# Supplementary material for: Copper-mediated radical alkylarylation of unactivated alkenes with acetonitrile leading to fluorenes and pyrroloindoles
Source: Royal Society of Chemistry journal article supplement (doi:10.1039/c5qo00329f), 2015-12-17

## Supporting Information

### Copper-mediated radical alkylarylation of unactivated alkenes with acetonitrile leading to fluorenes and pyrroloindoles

Xue-Qiang Chu, Zhen-Hua Xing, Hua Meng, Xiao-Ping Xu\* and Shun-Jun Ji\*

*Key Laboratory of Organic Synthesis of Jiangsu Province, College of Chemistry, Chemical Engineering and Materials Science & Collaborative Innovation Center of Suzhou Nano Science and Technology, Soochow University, Suzhou, 215123, People's Republic of China.*  
Fax : (+86)-512-65880307; phone: (+86)- 512-65880307; E-mail: [xuxp@suda.edu.cn](mailto:xuxp@suda.edu.cn);  
[shunjun@suda.edu.cn](mailto:shunjun@suda.edu.cn)

#### Table of Contents

|                                                                                     |             |
|-------------------------------------------------------------------------------------|-------------|
| General information.....                                                            | page S2     |
| General procedure for rapid assembly of fluorene and pyrroloindole derivatives..... | page S2     |
| General procedure for the synthesis of compound 10.....                             | page S3     |
| General procedure for the synthesis of compound 11.....                             | page S3     |
| Optimization of the reaction conditions (Table S1).....                             | page S3-4   |
| The photoluminescence spectra of prepared polycyclics.....                          | page S5     |
| Kinetic isotope effects (KIE) experiment (Figure S1) .....                          | page S5-S6  |
| The radical trapping experiment (Figure S2).....                                    | page S6-S7  |
| Analytical and spectral data for compounds.....                                     | page S7-22  |
| The <sup>1</sup> H and <sup>13</sup> C spectra of compounds.....                    | page S23-61 |

## Experimental Section:

### General

Unless otherwise stated, all reagents were purchased from commercial suppliers and used without further purification. All reactions were carried out in air and using undistilled solvent, without need of precautions to exclude air and moisture unless otherwise noted. Melting points were recorded on an Electrothermal digital melting point apparatus. IR spectra were recorded on a FT-IR spectrophotometer using KBr optics.  $^1\text{H}$ ,  $^{13}\text{C}$  NMR spectra were recorded in  $\text{CDCl}_3$  on 400 MHz spectrometers. Tetramethylsilane (TMS) served as internal standard for  $^1\text{H}$  NMR and  $^{13}\text{C}$  NMR. High resolution mass spectra were obtained using a commercial apparatus (ESI or EI Source).

### General procedure for rapid assembly of fluorene and pyrroloindole derivatives

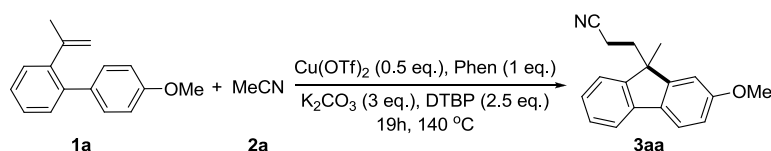

Alkene **1a** (0.2 mmol), acetonitrile **2a** (2 mL),  $\text{Cu}(\text{OTf})_2$  (0.1 mmol), 1,10-phenanthroline (0.2 mmol),  $\text{K}_2\text{CO}_3$  (0.6 mmol) and di-*tert*-butyl peroxide (0.5 mmol) was stirred at 140 °C under air in a pressure-tight tube. Upon completion of the reaction (indicated by TLC), solvent was removed in vacuum and the residue was purified by flash silica gel column chromatography using petroleum ether/ethyl acetate as eluent, affording pure product **3aa**.

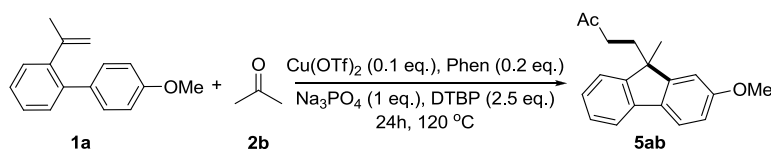

Alkene **1a** (0.3 mmol), acetone **2a** (2 mL),  $\text{Cu}(\text{OTf})_2$  (0.03 mmol), 1,10-phenanthroline (0.06 mmol),  $\text{Na}_3\text{PO}_4$  (0.3 mmol) and di-*tert*-butyl peroxide (0.75 mmol) was stirred at 120 °C under air in a pressure-tight tube. Upon completion of the reaction (indicated by TLC), solvent was removed in vacuum and the residue was purified by flash silica gel column chromatography using petroleum ether/ethyl acetate as eluent, affording pure product **5ab**.

### General procedure for the synthesis of compound **10**

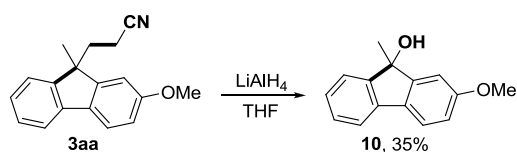

0.25 mmol of 3-(2-methoxy-9-methyl-9H-fluoren-9-yl)propanenitrile **3aa** was dissolved in 2.0 mL dry THF. Then 1 mmol of LiAlH<sub>4</sub> was added slowly at 0 °C. After 10 minutes, the cold bath was removed and the reaction mixture was stirred at room temperature for 3 h. The desired product 2-methoxy-9-methyl-9H-fluoren-9-ol **10** was obtained after purification by flash chromatography on silica gel (white solid, 35%).

### General procedure for the synthesis of compound **11**

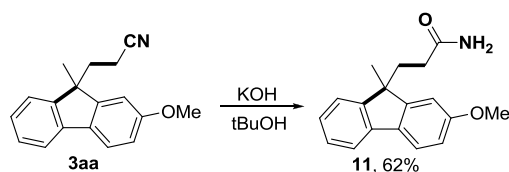

0.5 mmol of 3-(2-methoxy-9-methyl-9H-fluoren-9-yl)propanenitrile **3aa** and 2 mmol of KOH was dissolved in 2.0 mL of 2-methyl-2-propanol. The reaction mixture was stirred at 80 °C for 48 h. The desired product 3-(2-methoxy-9-methyl-9H-fluoren-9-yl)propanamide **11** was obtained after purification by flash chromatography on silica gel (white solid, 62%).

**Table S1:** Optimization of the reaction conditions<sup>a</sup>

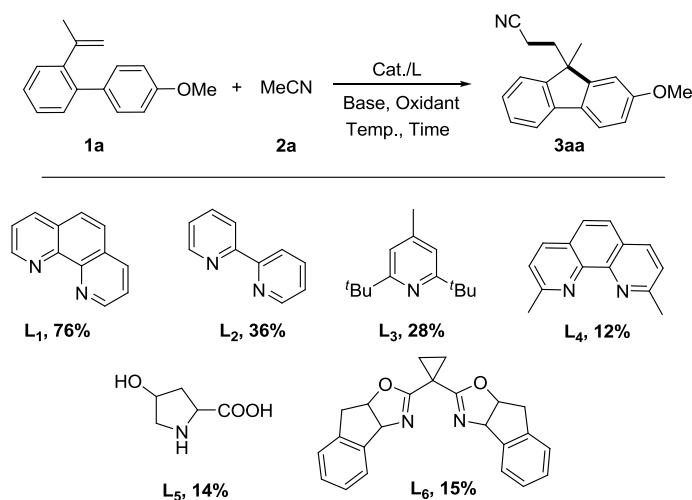

| Entry     | Catalyst<br>(equiv)                     | Ligand<br>(equiv)       | Oxidant<br>(x equiv) | Base<br>(x equiv)                     | Time<br>(h) | Temp.<br>(°C) | GC-Yield <sup>b</sup>     |                 |
|-----------|-----------------------------------------|-------------------------|----------------------|---------------------------------------|-------------|---------------|---------------------------|-----------------|
|           |                                         |                         |                      |                                       |             |               | 3aa                       | 1a <sup>c</sup> |
| 1         | Cu(OTf) <sub>2</sub> (0.5)              | L <sub>1</sub> (1)      | DTBP(2.5)            | K <sub>3</sub> PO <sub>4</sub> (3)    | 19          | 140           | 76                        | 0               |
| 2         | Cu(OTf) <sub>2</sub> (0.5)              | L <sub>2</sub> (1)      | DTBP(2.5)            | K <sub>3</sub> PO <sub>4</sub> (3)    | 19          | 140           | 36                        | 42              |
| 3         | Cu(OTf) <sub>2</sub> (0.5)              | L <sub>3</sub> (1)      | DTBP(2.5)            | K <sub>3</sub> PO <sub>4</sub> (3)    | 19          | 140           | 28                        | 20              |
| 4         | Cu(OTf) <sub>2</sub> (0.5)              | L <sub>4</sub> (1)      | DTBP(2.5)            | K <sub>3</sub> PO <sub>4</sub> (3)    | 19          | 140           | 12                        | 43              |
| 5         | Cu(OTf) <sub>2</sub> (0.5)              | L <sub>5</sub> (1)      | DTBP(2.5)            | K <sub>3</sub> PO <sub>4</sub> (3)    | 19          | 140           | 14                        | 50              |
| 6         | Cu(OTf) <sub>2</sub> (0.5)              | L <sub>6</sub> (1)      | DTBP(2.5)            | K <sub>3</sub> PO <sub>4</sub> (3)    | 19          | 140           | 15                        | 88              |
| 7         | Cu(OTf) <sub>2</sub> (0.5)              | --                      | DTBP(2.5)            | K <sub>3</sub> PO <sub>4</sub> (3)    | 19          | 140           | 0                         | --              |
| 8         | Cu(OTf) <sub>2</sub> (0.2)              | L <sub>1</sub> (0.4)    | DTBP(2.5)            | K <sub>3</sub> PO <sub>4</sub> (3)    | 19          | 140           | 10                        | 38              |
| 9         | Cu(OTf) <sub>2</sub> (0.5)              | L <sub>1</sub> (0.5)    | DTBP(2.5)            | K <sub>3</sub> PO <sub>4</sub> (3)    | 19          | 140           | 20                        | 28              |
| 10        | Cu(OTf) <sub>2</sub> (0.2)              | L <sub>1</sub> (0.2)    | DTBP(2.5)            | K <sub>3</sub> PO <sub>4</sub> (3)    | 19          | 140           | 24                        | 31              |
| <b>11</b> | <b>Cu(OTf)<sub>2</sub>(0.5)</b>         | <b>L<sub>1</sub>(1)</b> | <b>DTBP(2.5)</b>     | <b>K<sub>2</sub>CO<sub>3</sub>(3)</b> | <b>19</b>   | <b>140</b>    | <b>96(78)<sup>d</sup></b> | <b>0</b>        |
| 12        | Cu(OTf) <sub>2</sub> (0.5)              | L <sub>1</sub> (1)      | DTBP(2.5)            | CS <sub>2</sub> CO <sub>3</sub> (3)   | 19          | 140           | 36                        | 40              |
| 13        | Cu(OTf) <sub>2</sub> (0.5)              | L <sub>1</sub> (1)      | DTBP(2.5)            | NaOAc(3)                              | 19          | 140           | 49                        | 0               |
| 14        | Cu(OTf) <sub>2</sub> (0.5)              | L <sub>1</sub> (1)      | DTBP(2.5)            | ButOK(3)                              | 19          | 140           | 67                        | trace           |
| 15        | Cu(OTf) <sub>2</sub> (0.5)              | L <sub>1</sub> (1)      | DTBP(2.5)            | KOH(3)                                | 19          | 140           | 48                        | 18              |
| 16        | Cu(OTf) <sub>2</sub> (0.5)              | L <sub>1</sub> (1)      | DTBP(2.5)            | --                                    | 19          | 140           | trace                     | 78              |
| 17        | Cu(OAc) <sub>2</sub> (0.5)              | L <sub>1</sub> (1)      | DTBP(2.5)            | K <sub>2</sub> CO <sub>3</sub> (3)    | 19          | 140           | 61                        | 0               |
| 18        | CuOAc(0.5)                              | L <sub>1</sub> (1)      | DTBP(2.5)            | K <sub>2</sub> CO <sub>3</sub> (3)    | 19          | 140           | 56                        | trace           |
| 19        | Cu <sub>2</sub> O(0.5)                  | L <sub>1</sub> (1)      | DTBP(2.5)            | K <sub>2</sub> CO <sub>3</sub> (3)    | 19          | 140           | 33                        | 9               |
| 20        | Cu(NO <sub>3</sub> ) <sub>2</sub> (0.5) | L <sub>1</sub> (1)      | DTBP(2.5)            | K <sub>2</sub> CO <sub>3</sub> (3)    | 19          | 140           | 83                        | trace           |
| 21        | --                                      | L <sub>1</sub> (1)      | DTBP(2.5)            | K <sub>2</sub> CO <sub>3</sub> (3)    | 19          | 140           | 0                         | --              |
| 22        | Cu(OTf) <sub>2</sub> (0.5)              | L <sub>1</sub> (1)      | DCP(2.5)             | K <sub>2</sub> CO <sub>3</sub> (3)    | 19          | 140           | 62                        | trace           |
| 23        | Cu(OTf) <sub>2</sub> (0.5)              | L <sub>1</sub> (1)      | TBPB(2.5)            | K <sub>2</sub> CO <sub>3</sub> (3)    | 19          | 140           | 51                        | 0               |
| 24        | Cu(OTf) <sub>2</sub> (0.5)              | L <sub>1</sub> (1)      | BPO(2.5)             | K <sub>2</sub> CO <sub>3</sub> (3)    | 19          | 140           | 23                        | 17              |
| 25        | Cu(OTf) <sub>2</sub> (0.5)              | L <sub>1</sub> (1)      | DTBP(2.5)            | K <sub>2</sub> CO <sub>3</sub> (3)    | 19          | 130           | 87                        | 0               |
| 26        | Cu(OTf) <sub>2</sub> (0.5)              | L <sub>1</sub> (1)      | DTBP(2.5)            | K <sub>2</sub> CO <sub>3</sub> (3)    | 12          | 140           | 79                        | 0               |

<sup>a</sup>Reaction conditions: **1a** (0.2 mmol), **2a** (2 mL), catalyst (0.5 equiv), ligand (1 equiv), base (3 equiv) and oxidant (2.5 equiv) at 140 °C under air; DTBP = di-*tert*-butyl peroxide; DCP = dicumyl peroxide; TBPB = *tert*-butylperoxybenzoate; BPO = benzoyl peroxide. <sup>b</sup>Yields were determined by GC with an internal standard (biphenyl) on the basis of the ratio between the formed products and the initial amount of limiting reactant. <sup>c</sup>The recovery of **1a**. <sup>d</sup>Isolated yields.

**Figure S1:** The fluorescence spectra of prepared polycyclic **3va**, **3ta**, **5ba** and **5fa**

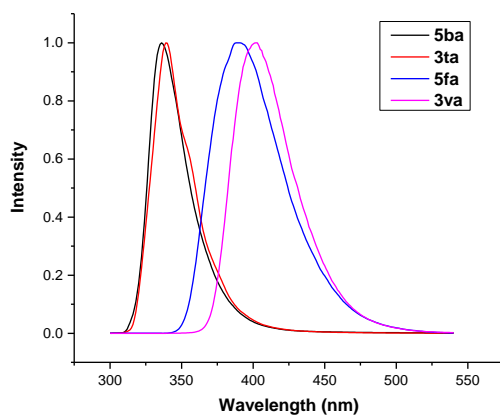

**Figure S2:** Kinetic isotope effects (KIE) experiment

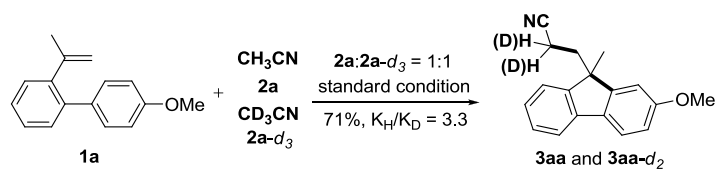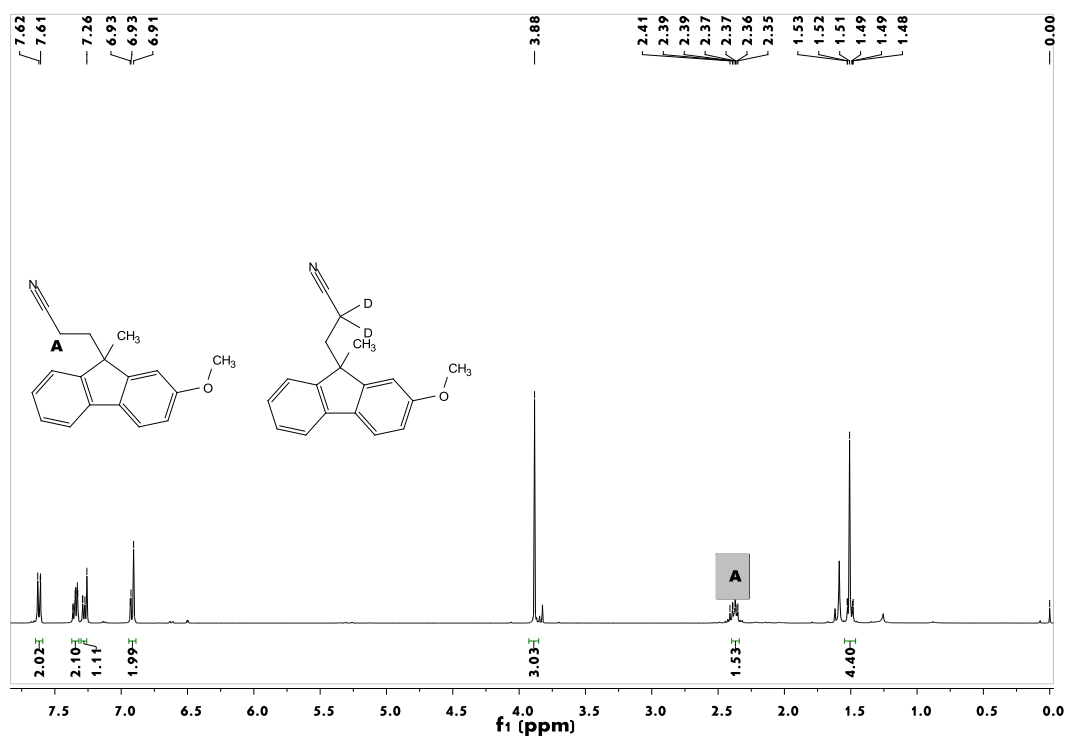

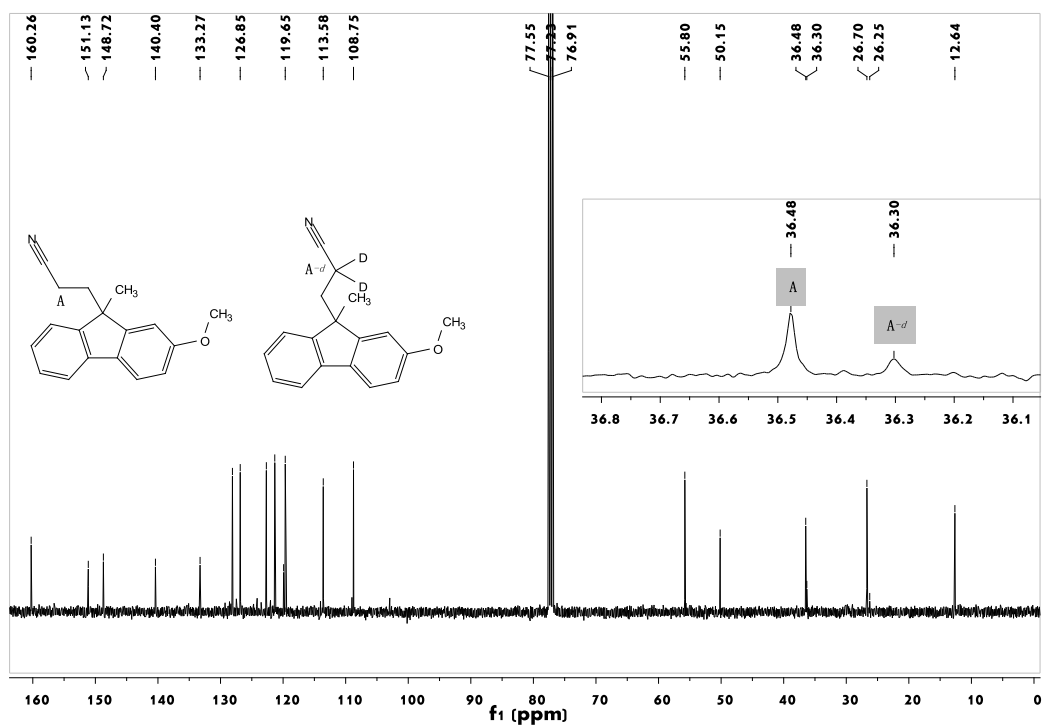

**Figure S3:** Trapping experiment with 2,2,6,6-tetramethylpiperidin-1-oxyl (TEMPO).

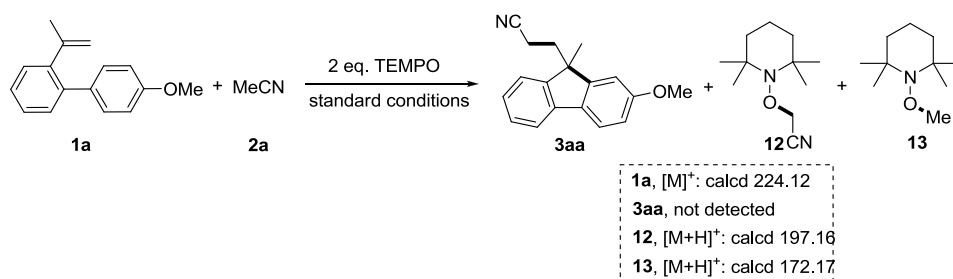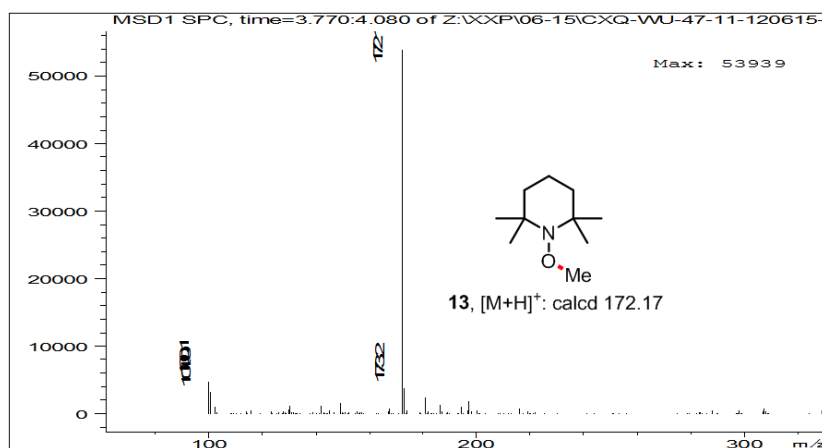

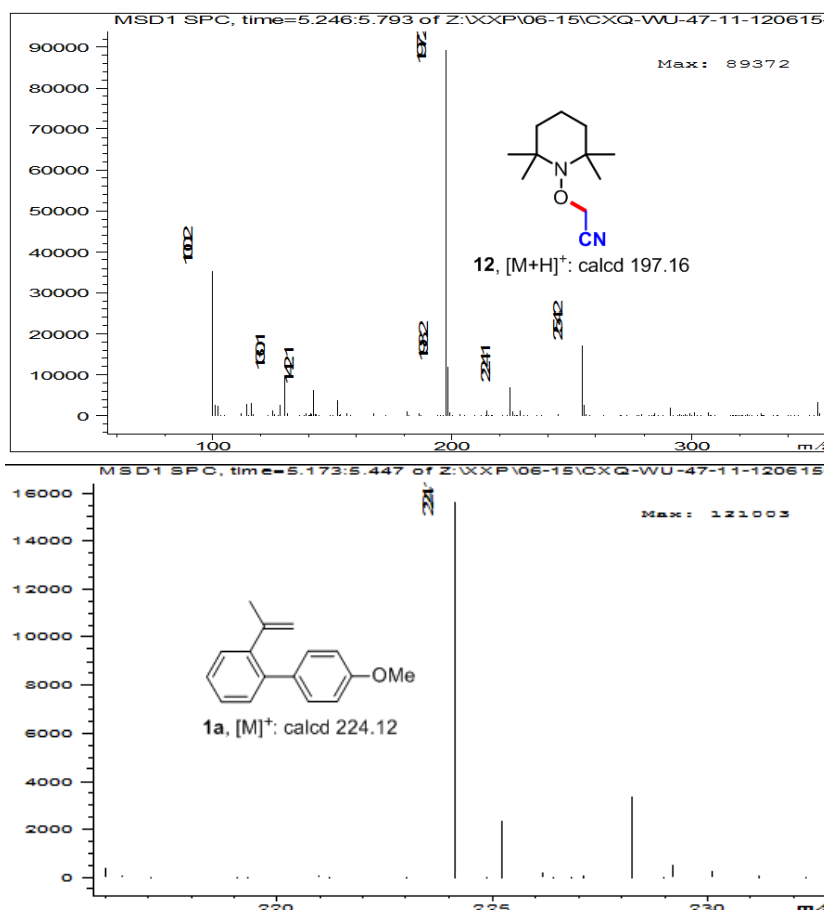

#### Analytical and spectral data of products:

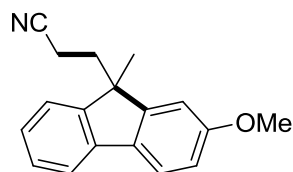

**3-(2-Methoxy-9-methyl-9H-fluoren-9-yl)propanenitrile (3aa):** Yield = 78%. Colourless oil. IR (KBr)  $\nu$  = 2960, 2925, 2866, 2246, 1610, 1459, 1280, 1253, 1036, 822, 736  $\text{cm}^{-1}$ . <sup>1</sup>H NMR (400 MHz, CDCl<sub>3</sub>):  $\delta$  = 7.64–7.59 (m, 2H), 7.37–7.31 (m, 2H), 7.29–7.25 (m, 1H), 6.94–6.89 (m, 2H), 3.88 (s, 3H), 2.45–2.31 (m, 2H), 1.51 (s, 3H), 1.50–1.47 (m, 2H) ppm. <sup>13</sup>C NMR (100 MHz, CDCl<sub>3</sub>):  $\delta$  = 160.3, 151.1, 148.7, 140.4, 133.3, 128.1, 126.8, 122.7, 121.3, 119.9, 119.6, 113.6, 108.8, 55.8, 50.2, 36.5, 26.7, 12.6 ppm. HRMS m/z: calcd for C<sub>18</sub>H<sub>17</sub>NNaO [M+Na]<sup>+</sup> 286.1202, found: 286.1205.

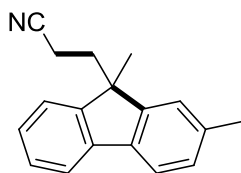

**3-(2,9-Dimethyl-9H-fluoren-9-yl)propanenitrile (3ba):** Yield = 72%. Colourless oil. IR (KBr)  $\nu$  = 2959, 2923, 2863, 2245, 1446, 1214, 823, 778, 738  $\text{cm}^{-1}$ .  $^1\text{H}$  NMR (400 MHz,  $\text{CDCl}_3$ ):  $\delta$  = 7.67 (dd,  $J$  = 5.5, 2.7 Hz, 1H), 7.60 (d,  $J$  = 8.2 Hz, 1H), 7.38–7.28 (m, 3H), 7.18 (d,  $J$  = 6.7 Hz, 2H), 2.44 (s, 3H), 2.42–2.36 (m, 2H), 1.51 (s, 3H), 1.51–1.46 (m, 2H) ppm.  $^{13}\text{C}$  NMR (100 MHz,  $\text{CDCl}_3$ ):  $\delta$  = 149.4, 149.1, 140.5, 138.1, 137.8, 128.9, 128.0, 127.5, 123.5, 122.8, 120.2, 120.2, 120.0, 50.0, 36.4, 26.7, 22.0, 12.7 ppm. HRMS  $m/z$ : calcd for  $\text{C}_{18}\text{H}_{17}\text{NNa}$   $[\text{M}+\text{Na}]^+$  270.1253, found: 270.1262.

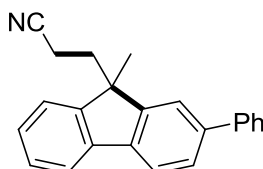

**3-(9-methyl-2-phenyl-9H-fluoren-9-yl)propanenitrile (3ca):** Yield = 50%. White solid. M.p. 108.2–109.3  $^{\circ}\text{C}$ . IR (KBr)  $\nu$  = 2987, 2972, 2246, 1435, 1407, 1251, 1075, 895, 760, 694  $\text{cm}^{-1}$ .  $^1\text{H}$  NMR (400 MHz,  $\text{CDCl}_3$ ):  $\delta$  = 7.80–7.72 (m, 2H), 7.67–7.60 (m, 3H), 7.59 (d,  $J$  = 1.1 Hz, 1H), 7.51–7.45 (m, 2H), 7.43–7.33 (m, 4H), 2.50–2.41 (m, 2H), 1.58 (s, 3H), 1.57–1.53 (m, 2H) ppm.  $^{13}\text{C}$  NMR (100 MHz,  $\text{CDCl}_3$ ):  $\delta$  = 149.9, 149.5, 141.3, 140.1, 139.6, 129.1, 128.2, 128.1, 127.7, 127.4, 127.3, 122.9, 121.5, 120.8, 120.6, 119.8, 50.3, 36.4, 26.7, 12.7 ppm. HRMS  $m/z$ : calcd for  $\text{C}_{23}\text{H}_{19}\text{NNa}$   $[\text{M}+\text{Na}]^+$  332.1410, found: 332.1407.

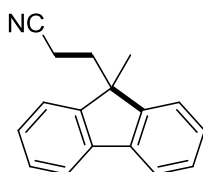

**3-(9-methyl-9H-fluoren-9-yl)propanenitrile (3da):** Yield = 59%. White solid. M.p. 72.2–74.5  $^{\circ}\text{C}$ . IR (KBr)  $\nu$  = 2955, 2920, 2852, 2242, 1443, 1260, 1076, 1025, 799, 731  $\text{cm}^{-1}$ .  $^1\text{H}$  NMR (400 MHz,  $\text{CDCl}_3$ ):  $\delta$  = 7.72 (dd,  $J$  = 6.1, 2.7 Hz, 2H), 7.40–7.33 (m, 6H), 2.47–2.37 (m, 2H), 1.53 (s, 3H), 1.51–1.45 (m, 2H) ppm.  $^{13}\text{C}$  NMR (100 MHz,  $\text{CDCl}_3$ ):  $\delta$  = 149.2, 140.4, 128.1, 128.0, 122.8, 120.5, 119.9, 50.2, 36.4, 26.6, 12.7 ppm. HRMS  $m/z$ : calcd for  $\text{C}_{17}\text{H}_{15}\text{NNa}$   $[\text{M}+\text{Na}]^+$  256.1097,



found: 256.1090.

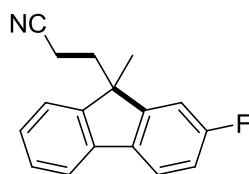

**3-(2-fluoro-9-methyl-9H-fluoren-9-yl)propanenitrile (3ea):** Yield = 74%. White solid. M.p. 60.1–61.7 °C. IR (KBr)  $\nu$  = 2957, 2922, 2862, 2246, 1613, 1444, 1265, 1186, 898, 821, 776, 734  $\text{cm}^{-1}$ .  $^1\text{H}$  NMR (400MHz,  $\text{CDCl}_3$ ):  $\delta$  = 7.71–7.63 (m, 2H), 7.41–7.30 (m, 3H), 7.11–7.05 (m, 2H), 2.46–2.33 (m, 2H), 1.56–1.50 (m, 5H) ppm.  $^{13}\text{C}$  NMR (100 MHz,  $\text{CDCl}_3$ ):  $\delta$  = 164.4, 162.0, 151.6, 151.6, 149.0, 149.0, 139.6, 136.4, 136.3, 128.3, 127.7, 122.8, 121.7, 121.6, 120.2, 119.6, 115.4, 115.2, 110.5, 110.3, 50.4, 50.4, 36.3, 26.5, 12.7 ppm. HRMS  $m/z$ : calcd for  $\text{C}_{17}\text{H}_{14}\text{FNNa}$  [ $\text{M}+\text{Na}$ ] $^+$  274.1002, found: 274.1008.

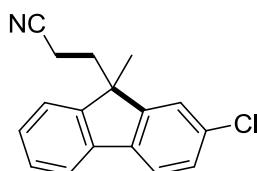

**3-(2-chloro-9-methyl-9H-fluoren-9-yl)propanenitrile (3fa):** Yield = 53%. Colourless oil. IR (KBr)  $\nu$  = 2959, 2920, 2850, 2245, 1632, 1443, 1263, 1083, 825, 789, 735  $\text{cm}^{-1}$ .  $^1\text{H}$  NMR (400MHz,  $\text{CDCl}_3$ ):  $\delta$  = 7.71–7.66 (m, 1H), 7.66–7.61 (m, 1H), 7.41–7.34 (m, 5H), 2.47–2.33 (m, 2H), 1.56–1.48 (m, 5H) ppm.  $^{13}\text{C}$  NMR (100 MHz,  $\text{CDCl}_3$ ):  $\delta$  = 151.1, 149.0, 139.3, 139.0, 133.8, 128.4, 128.3, 123.4, 122.9, 121.5, 120.6, 119.49, 50.4, 36.2, 26.5, 12.7 ppm. HRMS  $m/z$ : calcd for  $\text{C}_{17}\text{H}_{14}\text{ClNNa}$  [ $\text{M}+\text{Na}$ ] $^+$  290.0707, found: 290.0711.

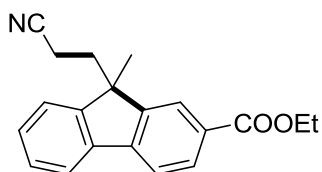

**ethyl 9-(2-cyanoethyl)-9-methyl-9H-fluorene-2-carboxylate (3ga):** Yield = 61%. White solid. M.p. 134.9–136.6 °C. IR (KBr)  $\nu$  = 2977, 2965, 2928, 2243, 1707, 1446, 1289, 1257, 1220, 1099, 1026, 860, 757, 740  $\text{cm}^{-1}$ .  $^1\text{H}$  NMR (400MHz,  $\text{CDCl}_3$ ):  $\delta$  = 8.11 (dd,  $J$  = 8.0, 1.5 Hz, 1H), 8.07–8.05 (m, 1H), 7.80–7.85 (m, 2H), 7.42 (d,  $J$  = 2.8 Hz, 3H), 4.46–4.39 (m, 2H), 2.55–2.40 (m, 2H), 1.57 (s, 3H), 1.53–1.47 (m, 2H), 1.47–1.40 (m, 3H) ppm.  $^{13}\text{C}$  NMR (100 MHz,  $\text{CDCl}_3$ ):  $\delta$  =

166.8, 150.3, 149.3, 144.9, 139.3, 130.1, 129.9, 129.2, 128.4, 124.0, 123.1, 121.4, 120.2, 119.5, 61.4, 50.3, 36.1, 26.5, 14.6, 12.7 ppm. HRMS m/z: calcd for C<sub>20</sub>H<sub>20</sub>NO<sub>2</sub> [M+H]<sup>+</sup> 306.1489, found: 306.1499.

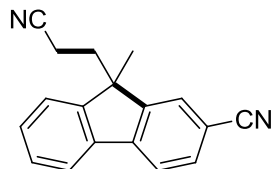

**9-(2-cyanoethyl)-9-methyl-9H-fluorene-2-carbonitrile (3ha):** Yield = 59%. Colourless oil. IR (KBr)  $\nu$  = 2961, 2922, 2850, 2223, 1609, 1447, 1184, 837, 783, 738 cm<sup>-1</sup>. <sup>1</sup>H NMR (400MHz, CDCl<sub>3</sub>):  $\delta$  = 7.85–7.77 (m, 2H), 7.73–7.66 (m, 2H), 7.48–7.42 (m, 3H), 2.45 (dd,  $J$  = 8.8, 7.4 Hz, 2H), 1.56 (s, 3H), 1.55–1.49 (m, 2H) ppm. <sup>13</sup>C NMR (100 MHz, CDCl<sub>3</sub>):  $\delta$  = 150.0, 149.8, 144.9, 138.5, 132.6, 129.9, 128.7, 126.6, 123.2, 121.7, 121.1, 119.3, 119.0, 111.0, 50.5, 35.8, 26.4, 12.7 ppm. HRMS m/z: calcd for C<sub>18</sub>H<sub>15</sub>N<sub>2</sub> [M+H]<sup>+</sup> 259.1230, found: 259.1231.

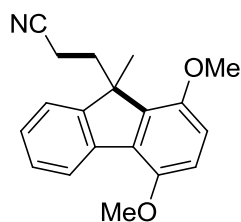

**3-(1,4-dimethoxy-9-methyl-9H-fluoren-9-yl)propanenitrile (3ia):** Yield = 65%. Colourless oil. IR (KBr)  $\nu$  = 2965, 2923, 2245, 1503, 1456, 1248, 1051, 1017, 756, 745, 668 cm<sup>-1</sup>. <sup>1</sup>H NMR (400MHz, CDCl<sub>3</sub>):  $\delta$  = 8.10–8.04 (m, 1H), 7.37–7.29 (m, 3H), 6.84 (d,  $J$  = 8.8 Hz, 1H), 6.76 (d,  $J$  = 8.8 Hz, 1H), 3.94 (s, 3H), 3.86 (s, 3H), 2.95–2.85 (m, 1H), 2.30–2.20 (m, 1H), 1.57 (s, 3H), 1.55–1.45 (m, 2H) ppm. <sup>13</sup>C NMR (100 MHz, CDCl<sub>3</sub>):  $\delta$  = 151.0, 150.5, 149.6, 139.6, 136.4, 129.7, 127.9, 127.2, 124.4, 121.7, 120.3, 110.9, 110.2, 55.9, 55.8, 51.3, 33.4, 24.3, 12.9 ppm. HRMS m/z: calcd for C<sub>19</sub>H<sub>19</sub>NNaO<sub>2</sub> [M+Na]<sup>+</sup> 316.1308, found: 316.1311.

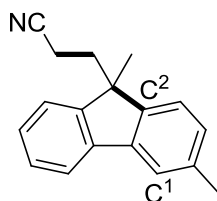

**3-(3,9-dimethyl-9H-fluoren-9-yl)propanenitrile (3ja) and 3-(1,9-dimethyl-9H-fluoren-9-yl)propanenitrile (3ja'):** Yield = 55% (C<sup>1</sup>/C<sup>2</sup> isomers, 3ja/3ja' =

1:1). IR (KBr)  $\nu$  = 2962, 2925, 2866, 2242, 1582, 1453, 1279, 1027, 821, 766, 741  $\text{cm}^{-1}$ . The  $^1\text{H}$  NMR spectrum of the isolated product showed a 1:1 mixture of **3ja** and its isomer **3ja'**.  $^1\text{H}$  NMR (400MHz,  $\text{CDCl}_3$ ) **3ja** and its isomer **3ja'**:  $\delta$  = 7.72–7.66 (m, 1H), 7.60–7.51 (m, 1H), 7.39–7.30 (m, 3H), 7.27–7.24 (m, 1H), 7.16 (d,  $J$  = 7.6 Hz, 0.5H), 7.08 (d,  $J$  = 7.5 Hz, 0.5H), 2.80–2.70 (m, 0.5H), 2.52 (s, 1.5H), 2.44 (s, 1.5H), 2.42–2.33 (m, 1.5H), 1.62 (s, 1.5H), 1.56–1.42 (m, 3.5H) ppm.  $^{13}\text{C}$  NMR (100 MHz,  $\text{CDCl}_3$ ) **3ja** and its isomer **3ja'**:  $\delta$  = 149.9, 149.6, 146.3, 145.4, 141.0, 140.5, 140.5, 140.3, 137.9, 134.5, 130.6, 128.9, 128.2, 128.0, 128.0, 127.9, 122.8, 122.5, 122.3, 121.1, 120.4, 120.2, 120.0, 119.9, 118.2, 51.5, 49.8, 36.4, 34.0, 26.7, 24.5, 21.7, 19.2, 12.7, 12.6 ppm. HRMS  $m/z$ : calcd for  $\text{C}_{18}\text{H}_{17}\text{NNa}$   $[\text{M}+\text{Na}]^+$  270.1253, found: 270.1256.

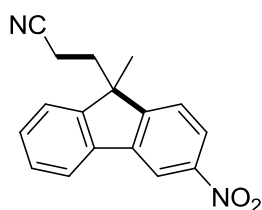

**3-(9-methyl-3-nitro-9H-fluoren-9-yl)propanenitrile (3ja)**: Yield = 23%. Yellow oil. IR (KBr)  $\nu$  = 2961, 2923, 2851, 2245, 1519, 1343, 1090, 1025, 782, 728  $\text{cm}^{-1}$ .  $^1\text{H}$  NMR (400MHz,  $\text{CDCl}_3$ ):  $\delta$  = 8.55 (d,  $J$  = 2.0 Hz, 1H), 8.25 (dd,  $J$  = 8.3, 2.1 Hz, 1H), 7.87–7.79 (m, 1H), 7.56 (d,  $J$  = 8.3 Hz, 1H), 7.50–7.42 (m, 3H), 2.48 (t,  $J$  = 8.1 Hz, 2H), 1.65–1.55 (m, 5H) ppm.  $^{13}\text{C}$  NMR (100 MHz,  $\text{CDCl}_3$ ):  $\delta$  = 156.0, 149.4, 148.7, 142.1, 138.2, 129.7, 128.8, 123.6, 123.2, 123.1, 121.4, 119.1, 115.6, 50.7, 35.9, 26.5, 12.7 ppm. HRMS  $m/z$ :  $\text{C}_{17}\text{H}_{14}\text{N}_2\text{NaO}_2$   $[\text{M}+\text{Na}]^+$  301.0947, found: 301.0941.

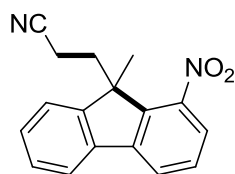

**3-(9-methyl-1-nitro-9H-fluoren-9-yl)propanenitrile (3ja')**: Yield = 40%. Yellow oil. IR (KBr)  $\nu$  = 2970, 2921, 2245, 1528, 1458, 1346, 1066, 762, 728  $\text{cm}^{-1}$ .  $^1\text{H}$  NMR (400MHz,  $\text{CDCl}_3$ ):  $\delta$  = 8.02 (dd,  $J$  = 7.6, 0.9 Hz, 1H), 7.96 (dd,  $J$  = 8.1, 0.9 Hz, 1H), 7.81–7.73 (m, 1H), 7.58 (t,  $J$  = 7.8 Hz, 1H), 7.51–7.41 (m, 3H), 3.27–3.17 (m, 1H), 2.42–2.32 (m, 1H), 1.63 (s, 3H), 1.61–1.49 (m, 2H) ppm.  $^{13}\text{C}$  NMR (100 MHz,  $\text{CDCl}_3$ ):  $\delta$  = 150.5, 148.4, 144.6, 141.1, 137.6, 129.8, 129.7, 128.5, 125.3, 123.8, 122.7, 120.6, 119.1, 77.6, 77.2, 76.9, 53.2, 34.5, 23.9, 13.0 ppm. HRMS  $m/z$ : calcd

for: C<sub>17</sub>H<sub>14</sub>N<sub>2</sub>NaO<sub>2</sub> [M+Na]<sup>+</sup> 301.0947, found: 301.0938.

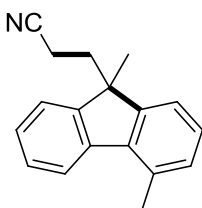

**3-(4,9-dimethyl-9H-fluoren-9-yl)propanenitrile (3la):** Yield = 57%. Colourless oil. IR (KBr)  $\nu$  = 2958, 2924, 2862, 2246, 1453, 1376, 1031, 792, 734 cm<sup>-1</sup>. <sup>1</sup>H NMR (400MHz, CDCl<sub>3</sub>):  $\delta$  = 7.86 (d,  $J$  = 7.5 Hz, 1H), 7.42–7.33 (m, 3H), 7.28–7.23 (m, 2H), 7.15 (dd,  $J$  = 6.5, 1.4 Hz, 1H), 2.70 (s, 3H), 2.44–2.37 (m, 2H), 1.50 (s, 3H), 1.49–1.43 (m, 2H) ppm. <sup>13</sup>C NMR (100 MHz, CDCl<sub>3</sub>):  $\delta$  = 149.6, 141.4, 138.4, 133.7, 130.4, 128.0, 127.7, 127.3, 123.6, 122.7, 120.2, 119.9, 49.7, 36.5, 27.0, 21.2, 12.6 ppm. HRMS  $m/z$ : calcd for C<sub>18</sub>H<sub>17</sub>NNa [M+Na]<sup>+</sup> 270.1253, found: 270.1245.

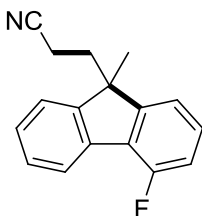

**3-(4-fluoro-9-methyl-9H-fluoren-9-yl)propanenitrile (3ma):** Yield = 76%. Colourless oil. IR (KBr)  $\nu$  = 2961, 2921, 2850, 2246, 1580, 1454, 1243, 1223, 951, 795, 729 cm<sup>-1</sup>. <sup>1</sup>H NMR (400MHz, CDCl<sub>3</sub>):  $\delta$  = 7.92 (d,  $J$  = 6.8 Hz, 1H), 7.43–7.36 (m, 3H), 7.34–7.28 (m, 1H), 7.17 (d,  $J$  = 7.5 Hz, 1H), 7.10–7.04 (m, 1H), 2.45–2.39 (m, 2H), 1.53 (s, 3H), 1.53–1.48 (m, 2H) ppm. <sup>13</sup>C NMR (100 MHz, CDCl<sub>3</sub>):  $\delta$  = 159.9, 157.4, 152.2, 148.6, 137.5, 137.5, 129.3, 129.3, 128.5, 128.2, 124.1, 124.0, 122.6, 119.6, 118.5, 118.5, 115.3, 115.1, 50.9, 36.4, 26.7, 12.7 ppm. HRMS  $m/z$ : calcd for C<sub>17</sub>H<sub>14</sub>FNNa [M+Na]<sup>+</sup> 274.1002, found: 274.1009.

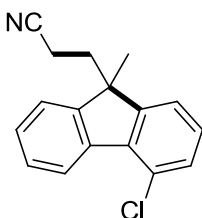

**3-(4-chloro-9-methyl-9H-fluoren-9-yl)propanenitrile (3na):** Yield = 49%. Colourless oil. IR (KBr)  $\nu$  = 2961, 2925, 2864, 2246, 1570, 1443, 1424, 1128, 797, 730 cm<sup>-1</sup>. <sup>1</sup>H NMR (400MHz, CDCl<sub>3</sub>):  $\delta$  = 8.43–8.37 (m, 1H), 7.45–7.38 (m, 3H), 7.35 (dd,  $J$  = 6.8, 2.2 Hz, 1H), 7.31–7.26 (m,

2H), 2.44–2.39 (m, 2H), 1.52 (s, 3H), 1.51–1.46 (m, 2H) ppm.  $^{13}\text{C}$  NMR (100 MHz,  $\text{CDCl}_3$ ):  $\delta$  = 151.8, 149.3, 139.1, 137.2, 129.7, 129.5, 128.6, 128.6, 128.2, 124.4, 122.5, 121.1, 119.6, 50.3, 36.4, 26.9, 12.6 ppm. HRMS  $m/z$ : calcd for  $\text{C}_{17}\text{H}_{14}\text{ClNNa}$   $[\text{M}+\text{Na}]^+$  290.0707, found: 290.0716.

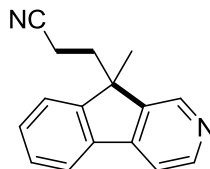

**3-(9-methyl-9H-indeno[2,1-c]pyridin-9-yl)propanenitrile (3oa):** Yield = 56%. White solid. M.p. 93.2–94.7 °C. IR (KBr)  $\nu$  = 2987, 2971, 2901, 2237, 1600, 1407, 1251, 1075, 742  $\text{cm}^{-1}$ .  $^1\text{H}$  NMR (400MHz,  $\text{CDCl}_3$ ):  $\delta$  = 8.69 (s, 1H), 8.65 (d,  $J$  = 4.8 Hz, 1H), 7.83–7.79 (m, 1H), 7.63 (d,  $J$  = 4.9 Hz, 1H), 7.55–7.43 (m, 3H), 2.58–2.42 (m, 2H), 1.61 (s, 3H), 1.59–1.49 (m, 2H) ppm.  $^{13}\text{C}$  NMR (100 MHz,  $\text{CDCl}_3$ ):  $\delta$  = 150.1, 149.5, 148.2, 145.0, 143.9, 138.0, 130.6, 128.6, 123.2, 122.2, 119.2, 115.3, 49.9, 35.9, 26.3, 12.8 ppm. HRMS  $m/z$ : calcd for  $\text{C}_{16}\text{H}_{14}\text{N}_2\text{Na}$   $[\text{M}+\text{Na}]^+$  257.1049, found: 257.1050.

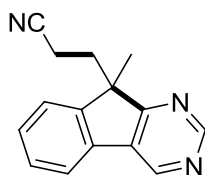

**3-(9-methyl-9H-indeno[2,1-d]pyrimidin-9-yl)propanenitrile (3pa):** Yield = 68%. White solid. M.p. 89.3–90.7 °C. IR (KBr)  $\nu$  = 2967, 2927, 2867, 2246, 1585, 1557, 1396, 1292, 1123, 1000, 809, 755  $\text{cm}^{-1}$ .  $^1\text{H}$  NMR (400MHz,  $\text{CDCl}_3$ ):  $\delta$  = 9.16 (s, 1H), 9.04 (s, 1H), 7.85–7.79 (m, 1H), 7.53–7.44 (m, 3H), 2.70–2.60 (m, 1H), 2.34–2.24 (m, 1H), 1.88–1.75 (m, 2H), 1.56 (s, 3H) ppm.  $^{13}\text{C}$  NMR (100 MHz,  $\text{CDCl}_3$ ):  $\delta$  = 177.3, 157.2, 148.4, 147.6, 134.9, 132.2, 130.0, 128.8, 123.5, 122.0, 119.0, 50.8, 34.0, 24.3, 12.9 ppm. HRMS  $m/z$ : calcd for  $\text{C}_{15}\text{H}_{14}\text{N}_3$   $[\text{M}+\text{H}]^+$  236.1182, found: 236.1192.

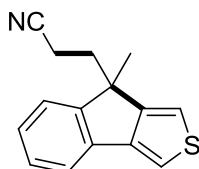

**3-(8-methyl-8H-indeno[1,2-c]thiophen-8-yl)propanenitrile (3qa):** Yield = 37%. White solid. M.p. 62.4–64.3 °C. IR (KBr)  $\nu$  = 2955, 2922, 2853, 2242, 1605, 1447, 1277, 1117, 1019, 751, 715

cm<sup>-1</sup>. <sup>1</sup>H NMR (400MHz, CDCl<sub>3</sub>): δ = 7.50–7.45 (m, 1H), 7.40 (d, *J* = 4.9 Hz, 1H), 7.34–9.29 (m, 2H), 7.25–7.20 (m, 2H), 2.46–2.31 (m, 2H), 1.75–1.62 (m, 2H), 1.57 (s, 3H) ppm. <sup>13</sup>C NMR (100 MHz, CDCl<sub>3</sub>): δ = 152.8, 151.3, 145.4, 138.2, 129.6, 128.0, 125.7, 122.5, 119.8, 119.7, 119.2, 50.0, 36.6, 26.8, 12.8 ppm. HRMS *m/z*: calcd for C<sub>15</sub>H<sub>13</sub>NNaS [M+Na]<sup>+</sup> 262.0661, found: 262.0669.

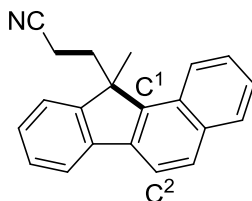

**3-(11-methyl-11H-benzo[a]fluoren-11-yl)propanenitrile (3ra) and**

**3-(11-methyl-11H-benzo[b]fluoren-11-yl)propanenitrile (3ra')**: Yield = 81% (C<sup>1</sup>/C<sup>2</sup> isomers,

**3ra/3ra'** = 4:1). White solid. IR (KBr)  $\nu$  = 2965, 2924, 2851, 2244, 1455, 1255, 1021, 824, 752

cm<sup>-1</sup>. The <sup>1</sup>H NMR spectrum of the isolated product showed a 4:1 mixture of **3ra** and its isomer

**3ra'**. <sup>1</sup>H NMR (400MHz, CDCl<sub>3</sub>) **3ra** and its isomer **3ra'**: δ = 8.16–8.07 (m, 1H), 7.97 (d, *J* = 8.1

Hz, 1H), 7.93–7.84 (m, 2H), 7.80 (d, *J* = 6.7 Hz, 1H), 7.64–7.56 (m, 1H), 7.54–7.40 (m, 2H),

7.45–7.36 (m, 2H), 3.01–2.91 (m, 0.8H), 2.68–2.55 (m, 0.8H), 2.53–2.45 (m, 0.4H), 1.77 (s, 2.4H),

1.61 (s, 0.6H), 1.58–1.50 (m, 0.4H), 1.37–1.31 (m, 1.6H) ppm. <sup>13</sup>C NMR (100 MHz, CDCl<sub>3</sub>) **3ra** and

its isomer **3ra'**: δ = 151.1, 149.6, 147.5, 142.6, 140.5, 139.8, 138.9, 138.4, 134.2, 133.8, 133.6, 130.2,

129.9, 129.7, 128.8, 128.4, 128.4, 128.2, 128.1, 127.8, 127.1, 126.2, 126.1, 125.5, 123.2, 123.1, 122.2,

121.6, 121.1, 120.2, 119.8, 119.8, 118.9, 118.7, 52.0, 49.8, 37.2, 35.6, 27.7, 26.0, 12.8, 12.7 ppm.

HRMS *m/z*: calcd for C<sub>21</sub>H<sub>17</sub>NNa [M+Na]<sup>+</sup> 306.1253, found: 306.1251.

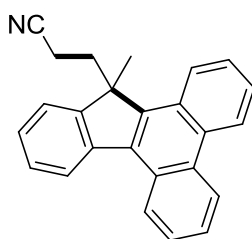

**3-(13-methyl-13H-indeno[1,2-l]phenanthren-13-yl)propanenitrile (3sa)**: Yield = 76%. Coless

oil. IR (KBr)  $\nu$  = 2987, 2971, 2243, 1732, 1455, 1374, 1241, 1066, 885, 776, 749 cm<sup>-1</sup>. <sup>1</sup>H NMR

(400MHz, CDCl<sub>3</sub>): δ = 8.70–8.63 (m, 2H), 8.38 (s, 1H), 8.33–8.27 (m, 1H), 7.98–7.92 (m, 1H),

7.79–7.73 (m, 2H), 7.66–7.59 (m, 3H), 7.47–7.40 (m, 2H), 2.64–2.44 (m, 2H), 1.86 (s, 3H), 1.75–1.58

(m, 2H) ppm. <sup>13</sup>C NMR (100 MHz, CDCl<sub>3</sub>): δ = 139.7, 139.1, 132.1, 131.9, 130.7, 130.5, 129.1,

129.1, 127.7, 127.4, 127.4, 127.2, 127.1, 126.9, 126.8, 124.6, 123.6, 123.0, 121.9, 120.6, 119.9, 43.8,

42.4, 34.5, 13.4 ppm. HRMS  $m/z$ : calcd for  $C_{25}H_{19}NNa$   $[M+Na]^+$  356.1410, found: 356.1405.

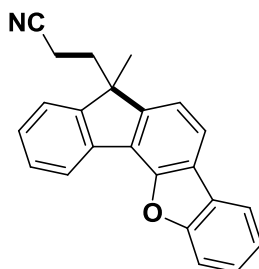

**3-(7-methyl-7H-benzo[d]fluoreno[4,3-b]furan-7-yl)propanenitrile (3ta):** Yield = 82%. White solid. M.p. 45–47 °C. IR (KBr)  $\nu$  = 2987, 2971, 2901, 2244, 1579, 1442, 1184, 1075, 826, 731  $cm^{-1}$ .  $^1H$  NMR (400MHz,  $CDCl_3$ ):  $\delta$  = 8.27 (d,  $J$  = 7.5 Hz, 1H), 8.00 (d,  $J$  = 7.3 Hz, 1H), 7.95 (d,  $J$  = 7.8 Hz, 1H), 7.69 (d,  $J$  = 8.2 Hz, 1H), 7.53–7.48 (m, 2H), 7.47–7.37 (m, 4H), 2.54–2.47 (m, 2H), 1.62 (s, 3H), 1.55–1.49 (m, 2H) ppm.  $^{13}C$  NMR (100 MHz,  $CDCl_3$ ):  $\delta$  = 156.9, 151.1, 149.3, 149.0, 138.1, 128.5, 127.9, 127.4, 124.8, 124.6, 124.2, 123.8, 123.3, 122.6, 120.8, 120.0, 119.8, 117.2, 112.2, 51.3, 36.6, 26.9, 12.7 ppm. HRMS  $m/z$ : calcd for  $C_{23}H_{17}NNaO$   $[M+Na]^+$  346.1202, found: 346.1210.

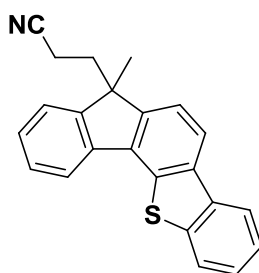

**3-(7-methyl-7H-benzo[d]fluoreno[4,3-b]thiophen-7-yl)propanenitrile (3ua):** Yield = 70%. White solid. M.p. 45–47 °C. IR (KBr)  $\nu$  = 2967, 2923, 2245, 1473, 1396, 1021, 1022, 824, 767, 736  $cm^{-1}$ .  $^1H$  NMR (400MHz,  $CDCl_3$ ):  $\delta$  = 8.26–8.18 (m, 2H), 8.00–7.94 (m, 2H), 7.58–7.41 (m, 6H), 2.58–2.49 (m, 2H), 1.62 (s, 3H), 1.54–1.49 (m, 2H) ppm.  $^{13}C$  NMR (100 MHz,  $CDCl_3$ ):  $\delta$  = 149.8, 148.2, 139.7, 139.7, 136.6, 135.2, 134.5, 132.7, 128.4, 128.0, 127.1, 125.0, 123.3, 122.7, 122.7, 121.9, 121.2, 119.8, 119.0, 50.9, 36.4, 26.8, 12.7 ppm. HRMS  $m/z$ : calcd for  $C_{23}H_{17}NNaS$   $[M+Na]^+$  362.0974, found: 362.0985.

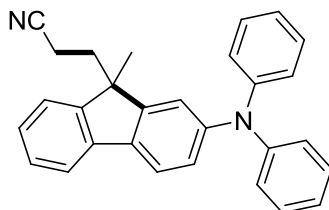

**3-(2-(diphenylamino)-9-methyl-9H-fluoren-9-yl)propanenitrile (3va):** Yield = 63%. White

solid. M.p. 120.0–121.5 °C. IR (KBr)  $\nu$  = 2956, 2923, 2244, 1584, 1486, 1446, 1273, 1024, 756, 739, 696  $\text{cm}^{-1}$ .  $^1\text{H}$  NMR (400MHz,  $\text{CDCl}_3$ ):  $\delta$  = 7.62 (d,  $J$  = 7.4 Hz, 1H), 7.55 (d,  $J$  = 8.2 Hz, 1H), 7.37–7.26 (m, 7H), 7.16–7.10 (m, 5H), 7.08–7.02 (m, 3H), 2.37–2.20 (m, 2H), 1.59–1.55 (m, 2H), 1.44 (s, 3H) ppm.  $^{13}\text{C}$  NMR (100 MHz,  $\text{CDCl}_3$ ):  $\delta$  = 150.6, 149.1, 148.3, 148.0, 140.3, 134.8, 129.6, 128.1, 127.1, 124.6, 123.8, 123.3, 122.7, 121.1, 119.9, 119.8, 118.1, 50.1, 36.2, 26.5, 12.7 ppm. HRMS  $m/z$ : calcd for  $\text{C}_{29}\text{H}_{24}\text{N}_2\text{Na}$   $[\text{M}+\text{Na}]^+$  423.1832, found: 423.1817.

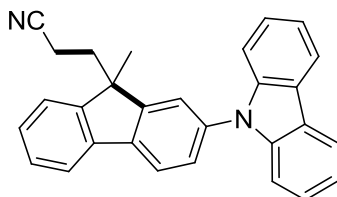

**3-(2-(9H-carbazol-9-yl)-9-methyl-9H-fluoren-9-yl)propanenitrile (3wa):** Yield = 77%. White solid. M.p. 62.0–63.5 °C. IR (KBr)  $\nu$  = 2989, 2953, 2244, 1595, 1495, 1450, 1334, 1229, 833, 749, 739, 723  $\text{cm}^{-1}$ .  $^1\text{H}$  NMR (400MHz,  $\text{CDCl}_3$ ):  $\delta$  = 8.16 (d,  $J$  = 7.8 Hz, 2H), 7.95–7.89 (m, 1H), 7.79 (d,  $J$  = 7.1 Hz, 1H), 7.61–7.56 (m, 2H), 7.47–7.39 (m, 7H), 7.33–7.28 (m, 2H), 2.48–2.36 (m, 2H), 1.69–1.63 (m, 2H), 1.58 (s, 3H) ppm.  $^{13}\text{C}$  NMR (100 MHz,  $\text{CDCl}_3$ ):  $\delta$  = 151.2, 149.4, 141.1, 139.7, 139.6, 137.4, 128.4, 128.4, 127.1, 126.3, 123.7, 123.0, 121.7, 121.7, 120.7, 120.6, 120.3, 119.5, 109.9, 50.5, 36.2, 26.6, 12.8 ppm. HRMS  $m/z$ : calcd for  $\text{C}_{29}\text{H}_{22}\text{N}_2\text{Na}$   $[\text{M}+\text{Na}]^+$  421.1675, found: 421.1680.

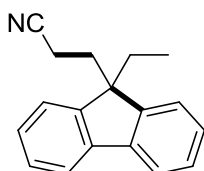

**3-(9-ethyl-9H-fluoren-9-yl)propanenitrile (4aa):** Yield = 46%. White solid. M.p. 78.2–80.1 °C. IR (KBr)  $\nu$  = 2964, 2924, 2853, 2245, 1448, 1363, 1169, 1081, 1021, 760, 733  $\text{cm}^{-1}$ .  $^1\text{H}$  NMR (400MHz,  $\text{CDCl}_3$ ):  $\delta$  = 7.74–7.69 (m, 2H), 7.40–7.33 (m, 6H), 2.45–2.38 (m, 2H), 2.06 (q,  $J$  = 7.4 Hz, 2H), 1.55–1.46 (m, 2H), 0.33 (t,  $J$  = 7.4 Hz, 3H) ppm.  $^{13}\text{C}$  NMR (100 MHz,  $\text{CDCl}_3$ ):  $\delta$  = 147.4, 141.6, 128.0, 127.9, 122.9, 120.3, 120.0, 55.0, 35.8, 33.0, 12.4, 8.4 ppm. HRMS  $m/z$ : calcd for  $\text{C}_{18}\text{H}_{17}\text{NNa}$   $[\text{M}+\text{Na}]^+$  270.1253, found: 270.1250.



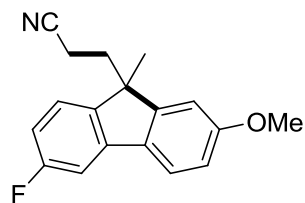

**3-(6-fluoro-2-methoxy-9-methyl-9H-fluoren-9-yl)propanenitrile (4ca):** Yield = 66%. Colourless oil. IR (KBr)  $\nu$  = 2988, 2963, 2926, 2245, 1614, 1584, 1487, 1431, 1284, 1172, 1037, 871, 823, 743  $\text{cm}^{-1}$ .  $^1\text{H}$  NMR (400MHz,  $\text{CDCl}_3$ ):  $\delta$  = 7.58 (d,  $J$  = 8.3 Hz, 1H), 7.30–7.26 (m, 2H), 6.99–6.88 (m, 3H), 3.89 (s, 3H), 2.40–2.33 (m, 2H), 1.53–1.51 (m, 1H), 1.50 (s, 3H) ppm.  $^{13}\text{C}$  NMR (100 MHz,  $\text{CDCl}_3$ ):  $\delta$  = 164.6, 162.2, 160.7, 151.9, 144.1, 144.0, 142.5, 142.4, 132.3, 123.8, 123.7, 121.7, 119.7, 113.8, 113.6, 113.4, 108.8, 107.0, 106.7, 55.8, 49.8, 36.4, 26.8, 12.6 ppm. HRMS  $m/z$ : calcd for  $\text{C}_{18}\text{H}_{16}\text{FNNaO}$   $[\text{M}+\text{Na}]^+$  304.1108, found: 304.1111.

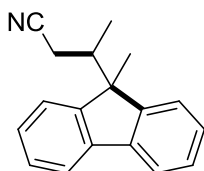

**3-(9-methyl-9H-fluoren-9-yl)butanenitrile (4da):** Yield = 57%. IR (KBr)  $\nu$  = 2965, 2925, 2245, 1446, 1383, 1296, 1026, 940, 765, 735  $\text{cm}^{-1}$ .  $^1\text{H}$  NMR (400MHz,  $\text{CDCl}_3$ ):  $\delta$  = 7.76–7.68 (m, 2H), 7.45 (d,  $J$  = 7.5 Hz, 1H), 7.41–7.29 (m, 5H), 2.56–2.47 (m, 1H), 1.81 (dd,  $J$  = 16.7, 3.4 Hz, 1H), 1.55 (s, 3H), 1.52–1.46 (m, 1H), 1.33 (d,  $J$  = 6.9 Hz, 3H) ppm.  $^{13}\text{C}$  NMR (100 MHz,  $\text{CDCl}_3$ ):  $\delta$  = 150.7, 140.7, 140.3, 128.1, 128.1, 128.0, 127.6, 124.5, 122.7, 120.5, 120.3, 119.7, 52.9, 40.1, 23.9, 20.4, 15.5 ppm. HRMS  $m/z$ : calcd for  $\text{C}_{18}\text{H}_{17}\text{NNa}$   $[\text{M}+\text{Na}]^+$  270.1253, found: 270.1262.

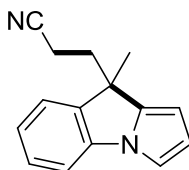

**3-(9-methyl-9H-pyrrolo[1,2-a]indol-9-yl)propanenitrile (5aa):** Yield = 35%. Colourless oil. IR (KBr)  $\nu$  = 2969, 2922, 2245, 1712, 1614, 1491, 1379, 1258, 1066, 750, 708  $\text{cm}^{-1}$ .  $^1\text{H}$  NMR (400MHz,  $\text{CDCl}_3$ ):  $\delta$  = 7.35–7.27 (m, 2H), 7.24 (d,  $J$  = 7.7 Hz, 1H), 7.16–7.12 (m, 1H), 7.02 (dd,  $J$  = 2.8, 0.9 Hz, 1H), 6.37 (t,  $J$  = 3.1 Hz, 1H), 6.04 (dd,  $J$  = 3.3, 0.9 Hz, 1H), 2.32–2.24 (m, 2H), 1.92–1.84 (m, 1H), 1.76–1.69 (m, 1H), 1.55 (s, 3H) ppm.  $^{13}\text{C}$  NMR (100 MHz,  $\text{CDCl}_3$ ):  $\delta$  = 141.8, 141.5, 140.2, 128.6, 124.1, 123.6, 119.7, 113.8, 110.5, 110.2, 101.3, 77.6, 77.2, 76.9, 44.9, 37.0, 26.7, 13.2 ppm.

HRMS m/z: calcd for C<sub>15</sub>H<sub>15</sub>N<sub>2</sub> [M+H]<sup>+</sup> 223.1230, found: 223.1235.

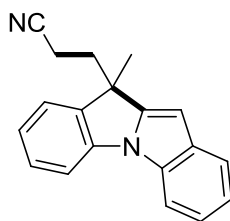

**3-(10-methyl-10H-indolo[1,2-a]indol-10-yl)propanenitrile (5ba):** Yield = 60%. Colourless oil. IR (KBr)  $\nu$  = 2963, 2924, 2865, 2245, 1601, 1489, 1453, 1180, 1010, 785, 744, 694 cm<sup>-1</sup>. <sup>1</sup>H NMR (400MHz, CDCl<sub>3</sub>):  $\delta$  = 7.77–7.72 (m, 1H), 7.65 (d, *J* = 8.0 Hz, 1H), 7.57 (d, *J* = 7.8 Hz, 1H), 7.44–7.38 (m, 1H), 7.35–7.29 (m, 2H), 7.23–7.14 (m, 2H), 6.43 (s, 1H), 2.41–2.35 (m, 2H), 1.96–1.86 (m, 1H), 1.79–1.73 (m, 1H), 1.63 (s, 3H) ppm. <sup>13</sup>C NMR (100 MHz, CDCl<sub>3</sub>):  $\delta$  = 148.5, 140.5, 140.3, 133.4, 131.0, 129.1, 123.6, 123.4, 122.6, 121.6, 121.1, 119.5, 111.1, 110.8, 95.9, 44.7, 37.2, 27.3, 13.3 ppm. HRMS m/z: calcd for C<sub>19</sub>H<sub>16</sub>N<sub>2</sub>Na [M+Na]<sup>+</sup> 295.1206, found: 295.1210.

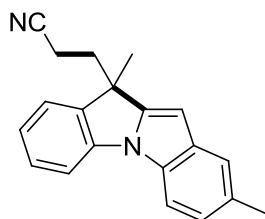

**3-(2,10-dimethyl-10H-indolo[1,2-a]indol-10-yl)propanenitrile (5ca):** Yield = 61%. Colourless oil. IR (KBr)  $\nu$  = 2962, 2922, 2855, 2246, 1608, 1572, 1486, 1300, 1019, 790, 746, 693 cm<sup>-1</sup>. <sup>1</sup>H NMR (400MHz, CDCl<sub>3</sub>):  $\delta$  = 7.62 (d, *J* = 8.4 Hz, 1H), 7.52 (d, *J* = 7.8 Hz, 1H), 7.45–7.36 (m, 2H), 7.32 (d, *J* = 7.4 Hz, 1H), 7.17–7.10 (m, 2H), 6.34 (s, 1H), 2.48 (s, 3H), 2.40–2.33 (m, 2H), 1.94–1.84 (m, 1H), 1.77–1.72 (m, 1H), 1.62 (s, 3H) ppm. <sup>13</sup>C NMR (100 MHz, CDCl<sub>3</sub>):  $\delta$  = 148.6, 140.6, 140.2, 133.7, 130.5, 129.2, 129.0, 124.0, 123.5, 123.1, 121.4, 119.5, 110.7, 110.6, 95.4, 44.7, 37.2, 27.3, 21.7, 13.3 ppm. HRMS m/z: calcd for C<sub>20</sub>H<sub>18</sub>N<sub>2</sub>Na [M+Na]<sup>+</sup> 309.1362, found: 309.1374.

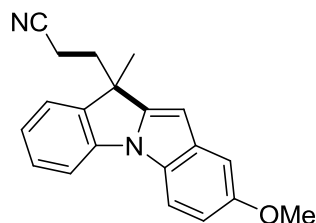

**3-(2-methoxy-10-methyl-10H-indolo[1,2-a]indol-10-yl)propanenitrile (5da):** Yield = 60%. White solid. M.p. 91.4–93.0 °C. IR (KBr)  $\nu$  = 2958, 2928, 2243, 1573, 1485, 1186, 1039, 875, 776,

732 cm<sup>-1</sup>. <sup>1</sup>H NMR (400MHz, CDCl<sub>3</sub>): δ = 7.63 (d, *J* = 8.8 Hz, 1H), 7.50 (d, *J* = 7.8 Hz, 1H), 7.42–7.37 (m, 1H), 7.32 (d, *J* = 7.5 Hz, 1H), 7.17–7.10 (m, 2H), 6.95 (dd, *J* = 8.8, 2.5 Hz, 1H), 6.36 (s, 1H), 3.88 (s, 3H), 2.40–2.33 (m, 2H), 1.95–1.85 (m, 1H), 1.79–1.73 (m, 1H), 1.62 (s, 3H) ppm. <sup>13</sup>C NMR (100 MHz, CDCl<sub>3</sub>): δ = 155.0, 149.2, 140.5, 140.1, 134.1, 129.0, 126.1, 123.5, 123.1, 119.5, 112.2, 111.6, 110.3, 103.9, 95.6, 56.1, 44.8, 37.1, 27.2, 13.3 ppm. HRMS *m/z*: calcd for C<sub>20</sub>H<sub>18</sub>N<sub>2</sub>NaO [M+Na]<sup>+</sup> 325.1311, found: 325.1318.

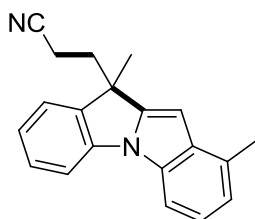

**3-(1,10-dimethyl-10H-indolo[1,2-a]indol-10-yl)propanenitrile (5ea):** Yield = 65%. Colourless oil. IR (KBr)  $\nu$  = 2968, 2922, 2245, 1598, 1499, 1476, 1225, 1076, 1046, 761, 693 cm<sup>-1</sup>. <sup>1</sup>H NMR (400MHz, CDCl<sub>3</sub>): δ = 7.61–7.54 (m, 2H), 7.44–7.38 (m, 1H), 7.34 (d, *J* = 7.4 Hz, 1H), 7.24–7.19 (m, 1H), 7.18–7.13 (m, 1H), 7.04–6.99 (m, 1H), 6.45 (d, *J* = 0.5 Hz, 1H), 2.58 (s, 3H), 2.43–2.34 (m, 2H), 1.96–1.86 (m, 1H), 1.78–1.72 (m, 1H), 1.64 (s, 3H) ppm. <sup>13</sup>C NMR (100 MHz, CDCl<sub>3</sub>): δ = 147.9, 140.6, 140.3, 133.1, 131.1, 130.6, 129.0, 123.6, 123.4, 122.7, 121.4, 119.6, 110.8, 108.7, 94.3, 77.6, 77.2, 76.9, 44.8, 37.2, 27.4, 19.0, 13.4 ppm. HRMS *m/z*: calcd for C<sub>20</sub>H<sub>18</sub>N<sub>2</sub>Na [M+Na]<sup>+</sup> 309.1362, found: 309.1373.

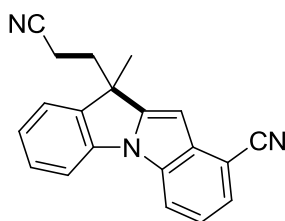

**10-(2-cyanoethyl)-10-methyl-10H-indolo[1,2-a]indole-1-carbonitrile (5fa):** Yield = 61%. Colourless oil. IR (KBr)  $\nu$  = 2987, 2971, 2901, 2218, 1617, 1493, 1227, 1074, 774, 748 cm<sup>-1</sup>. <sup>1</sup>H NMR (400MHz, CDCl<sub>3</sub>): δ = 7.97 (d, *J* = 8.3 Hz, 1H), 7.60 (d, *J* = 7.9 Hz, 1H), 7.57–7.53 (m, 1H), 7.50–7.44 (m, 1H), 7.42–7.34 (m, 2H), 7.26–7.23 (m, 1H), 6.70 (d, *J* = 0.5 Hz, 1H), 2.49–2.39 (m, 2H), 1.98–1.90 (m, 1H), 1.84–1.76 (m, 1H), 1.68 (s, 3H) ppm. <sup>13</sup>C NMR (100 MHz, CDCl<sub>3</sub>): δ = 151.4, 140.2, 139.7, 134.7, 130.6, 129.3, 126.0, 124.6, 124.0, 122.3, 118.9, 118.4, 115.5, 111.2, 104.1, 95.0, 45.2, 36.8, 27.1, 13.4 ppm. HRMS *m/z*: calcd for C<sub>20</sub>H<sub>16</sub>N<sub>3</sub> [M+H]<sup>+</sup> 298.1339, found: 298.1343.

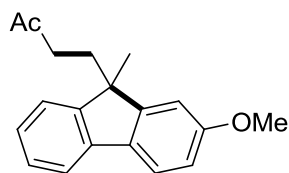

**4-(2-methoxy-9-methyl-9H-fluoren-9-yl)butan-2-one (5ab):** Yield = 46%. Colourless oil. IR (KBr)  $\nu$  = 1712, 1456, 1253, 1036, 823, 736  $\text{cm}^{-1}$ .  $^1\text{H}$  NMR (400MHz,  $\text{CDCl}_3$ ):  $\delta$  = 7.63 (dd,  $J$  = 7.5, 1.8 Hz, 2H), 7.35–7.30 (m, 2H), 7.23 (dd,  $J$  = 7.4, 0.8 Hz, 1H), 6.90 (dd,  $J$  = 7.3, 2.1 Hz, 2H), 3.87 (s, 3H), 2.34–2.24 (m, 2H), 1.79 (s, 3H), 1.66 (d,  $J$  = 8.1 Hz, 2H), 1.48 (s, 3H) ppm.  $^{13}\text{C}$  NMR (100 MHz,  $\text{CDCl}_3$ ):  $\delta$  = 209.2, 160.0, 153.0, 150.5, 140.4, 133.3, 127.5, 126.5, 122.9, 121.0, 119.3, 113.2, 108.8, 55.8, 50.1, 38.9, 34.0, 30.1, 27.2 ppm. HRMS  $m/z$ : calcd for  $\text{C}_{19}\text{H}_{21}\text{O}_2$   $[\text{M}+\text{H}]^+$  281.1536, found: 281.1539.

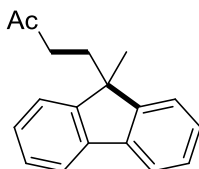

**4-(9-methyl-9H-fluoren-9-yl)butan-2-one (5db):** Yield = 50%. Colourless oil. IR (KBr)  $\nu$  = 1713, 1444, 1359, 1158, 765, 735  $\text{cm}^{-1}$ .  $^1\text{H}$  NMR (400MHz,  $\text{CDCl}_3$ ):  $\delta$  = 7.73 (dd,  $J$  = 6.8, 1.8 Hz, 2H), 7.39–7.37 (m, 1H), 7.36 (s, 2H), 7.34–7.29 (m, 3H), 2.37–2.30 (m, 2H), 1.77 (s, 3H), 1.66–1.61 (m, 2H), 1.50 (s, 3H) ppm.  $^{13}\text{C}$  NMR (100 MHz,  $\text{CDCl}_3$ ):  $\delta$  = 209.1, 151.0, 140.4, 127.6, 127.5, 123.0, 120.1, 50.1, 38.8, 33.9, 30.1, 27.1 ppm. HRMS  $m/z$ : calcd for  $\text{C}_{18}\text{H}_{19}\text{O}$   $[\text{M}+\text{H}]^+$  251.1430, found: 251.1430.

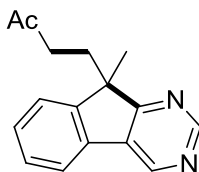

**4-(9-methyl-9H-indeno[2,1-d]pyrimidin-9-yl)butan-2-one (5pb):** Yield = 47%. Colourless oil. IR (KBr)  $\nu$  = 1711, 1585, 1556, 1395, 1161, 809, 754  $\text{cm}^{-1}$ .  $^1\text{H}$  NMR (400MHz,  $\text{CDCl}_3$ ):  $\delta$  = 9.15 (s, 1H), 9.03 (s, 1H), 7.81 (dd,  $J$  = 5.3, 2.4 Hz, 1H), 7.51–7.41 (m, 3H), 2.52–2.42 (m, 1H), 2.34–2.25 (m, 1H), 1.89 (s, 3H), 1.84–1.78 (m, 2H), 1.54 (s, 3H) ppm.  $^{13}\text{C}$  NMR (100 MHz,  $\text{CDCl}_3$ ):  $\delta$  = 207.9, 178.8, 157.0, 149.2, 148.0, 134.8, 132.2, 129.7, 128.2, 123.7, 121.6, 50.8, 38.6, 32.1, 30.0, 24.5 ppm. HRMS  $m/z$ : calcd for  $\text{C}_{16}\text{H}_{17}\text{N}_2\text{O}$   $[\text{M}+\text{H}]^+$  253.1335, found: 253.1344.

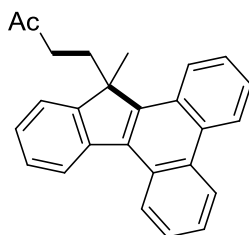

**4-(13-methyl-13H-indeno[1,2-l]phenanthren-13-yl)butan-2-one (5sb):** Yield = 54%. Colourless oil. IR (KBr)  $\nu = 1710, 1455, 1159, 776, 750 \text{ cm}^{-1}$ .  $^1\text{H NMR}$  (400MHz,  $\text{CDCl}_3$ ):  $\delta = 8.67\text{--}8.61$  (m, 2H), 8.38 (s, 1H), 8.34–8.25 (m, 1H), 7.95 (dd,  $J = 5.9, 3.3 \text{ Hz}$ , 1H), 7.74 (dd,  $J = 8.5, 6.6 \text{ Hz}$ , 2H), 7.65–7.57 (m, 3H), 7.42–7.36 (m, 2H), 2.56–2.48 (m, 1H), 2.46–2.37 (m, 1H), 1.90–1.82 (m, 1H), 1.82 (d,  $J = 4.4 \text{ Hz}$ , 3H), 1.80–1.75 (m, 1H), 1.74 (s, 3H) ppm.  $^{13}\text{C NMR}$  (100 MHz,  $\text{CDCl}_3$ ):  $\delta = 209.1, 141.5, 140.9, 132.1, 131.7, 130.5, 130.5, 129.0, 128.8, 127.8, 127.2, 127.2, 127.1, 126.8, 124.7, 123.3, 123.0, 121.2, 120.1, 42.0, 41.3, 39.9, 35.4, 30.1$  ppm. HRMS  $m/z$ : calcd for  $\text{C}_{26}\text{H}_{23}\text{O}$   $[\text{M}+\text{H}]^+$  351.1743, found: 351.1736.

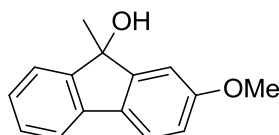

**2-methoxy-9-methyl-9H-fluoren-9-ol (10):** Yield = 35%. White solid. M.p. 121.2–123.0 °C. IR (KBr)  $\nu = 3314, 2922, 2852, 1609, 1459, 1261, 1092, 1033, 803, 735 \text{ cm}^{-1}$ .  $^1\text{H NMR}$  (400MHz,  $\text{CDCl}_3$ ):  $\delta = 7.53$  (dd,  $J = 8.3, 2.6 \text{ Hz}$ , 3H), 7.36–7.30 (m, 1H), 7.26–7.22 (m, 1H), 7.12 (d,  $J = 2.4 \text{ Hz}$ , 1H), 6.92–6.88 (m, 1H), 3.87 (s, 3H), 1.98 (s, 1H), 1.73 (s, 3H) ppm.  $^{13}\text{C NMR}$  (100 MHz,  $\text{CDCl}_3$ ):  $\delta = 160.5, 152.0, 149.7, 139.1, 131.6, 129.2, 127.1, 123.3, 121.2, 119.5, 114.9, 109.1, 76.9, 55.8, 26.5$  ppm. HRMS  $m/z$ : calcd for  $\text{C}_{15}\text{H}_{13}\text{O}$   $[\text{M}-\text{OH}]^+$  209.0961, found: 209.0959.

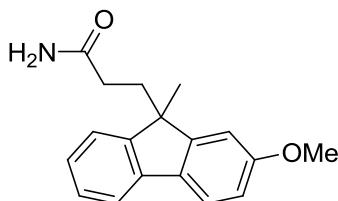

**3-(2-methoxy-9-methyl-9H-fluoren-9-yl)propanamide (11):** Yield = 62%. Colourless oil. IR (KBr)  $\nu = 3449, 3334, 3189, 2956, 2923, 2854, 1660, 1611, 1458, 1272, 1036, 776, 736 \text{ cm}^{-1}$ .  $^1\text{H NMR}$  (400MHz,  $\text{CDCl}_3$ ):  $\delta = 7.61$  (d,  $J = 8.3 \text{ Hz}$ , 2H), 7.39–7.29 (m, 2H), 7.26–7.22 (m, 1H), 6.97–6.86 (m, 2H), 5.08 (d,  $J = 99.6 \text{ Hz}$ , 2H), 3.87 (s, 3H), 2.44–2.31 (m, 2H), 1.50 (s, 3H), 1.47–1.39 (m, 2H) ppm.  $^{13}\text{C NMR}$  (100 MHz,  $\text{CDCl}_3$ ):  $\delta = 175.5, 160.1, 152.9, 150.4, 140.3, 133.2, 127.5,$

---

126.6, 122.9, 120.9, 119.3, 113.3, 108.8, 55.8, 50.3, 35.6, 30.7, 27.1 ppm. HRMS m/z: calcd for  $C_{18}H_{19}NNaO_2$   $[M+Na]^+$  304.1308, found: 304.1317.

The  $^1\text{H}$ ,  $^{13}\text{C}$  spectra of compounds:

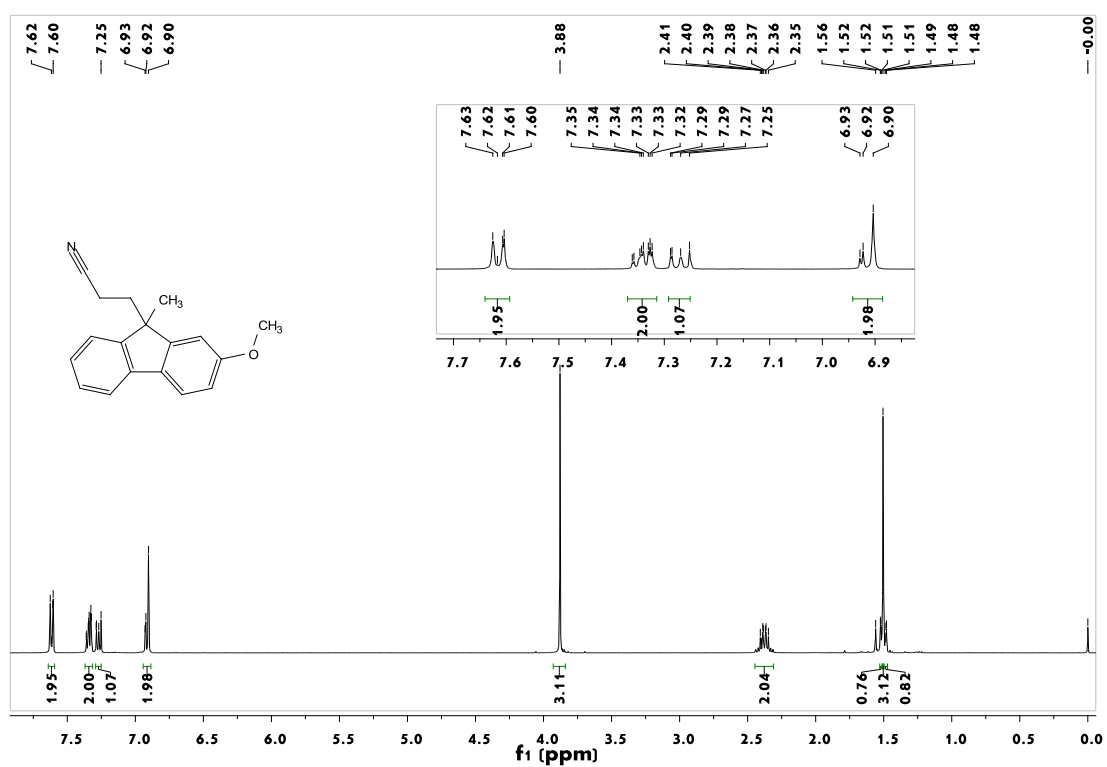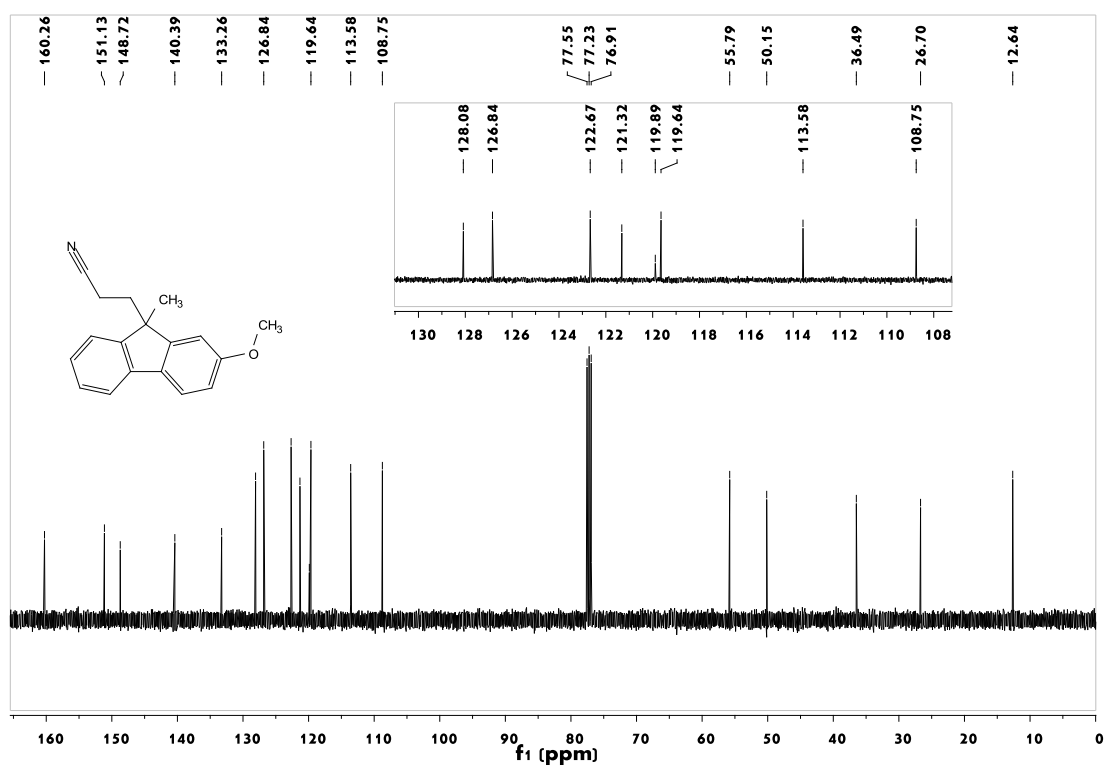

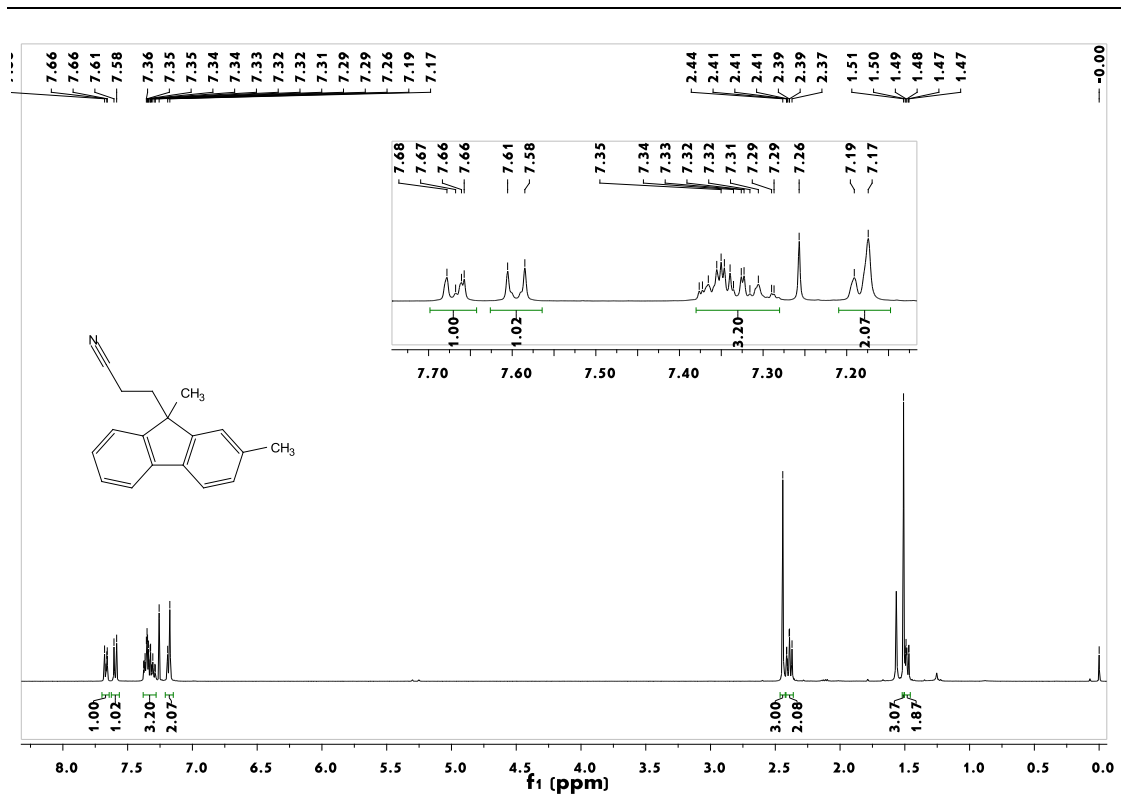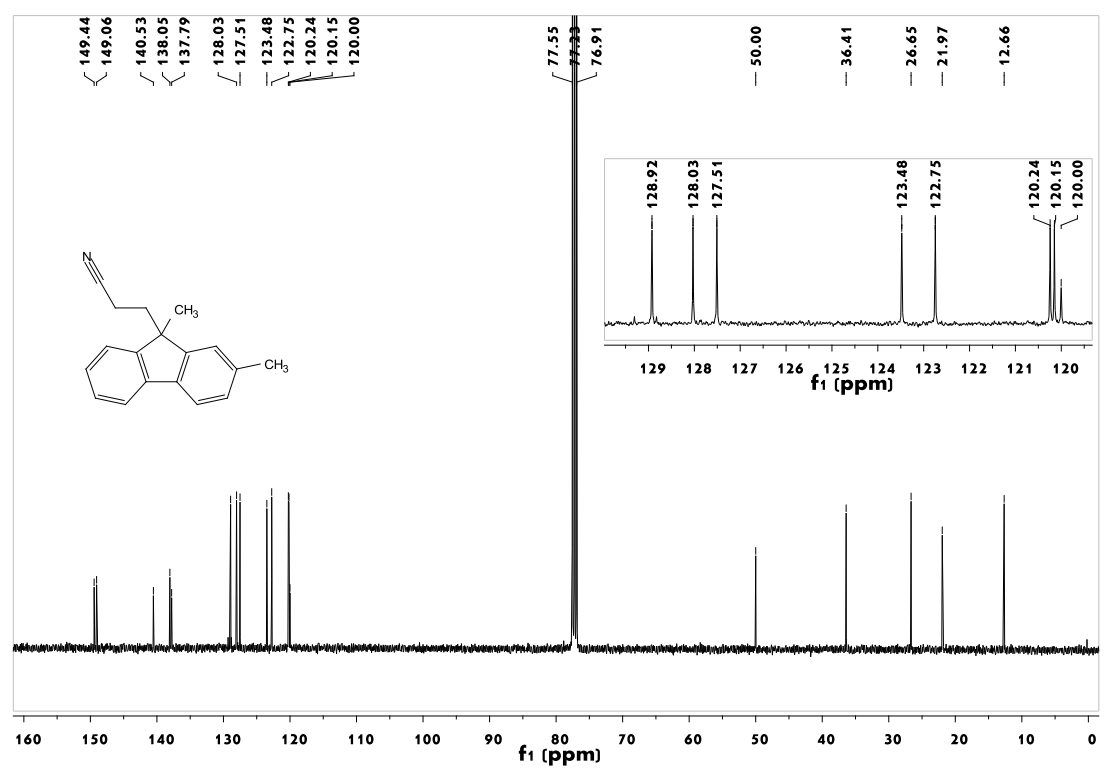



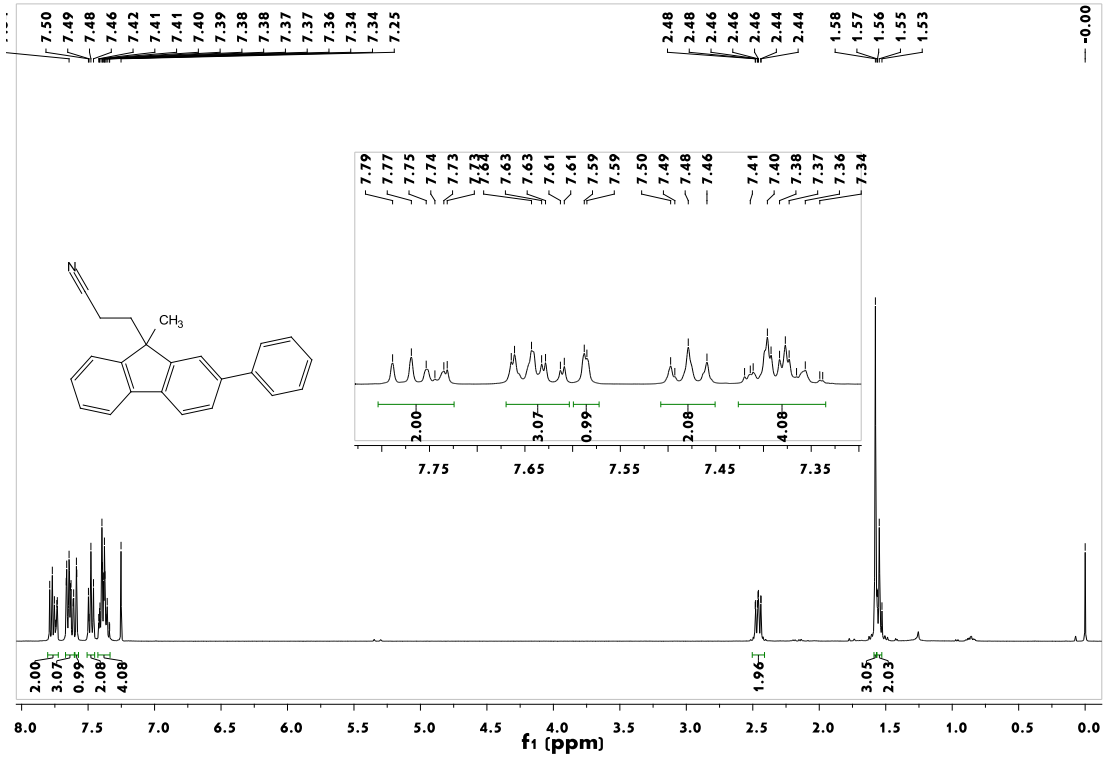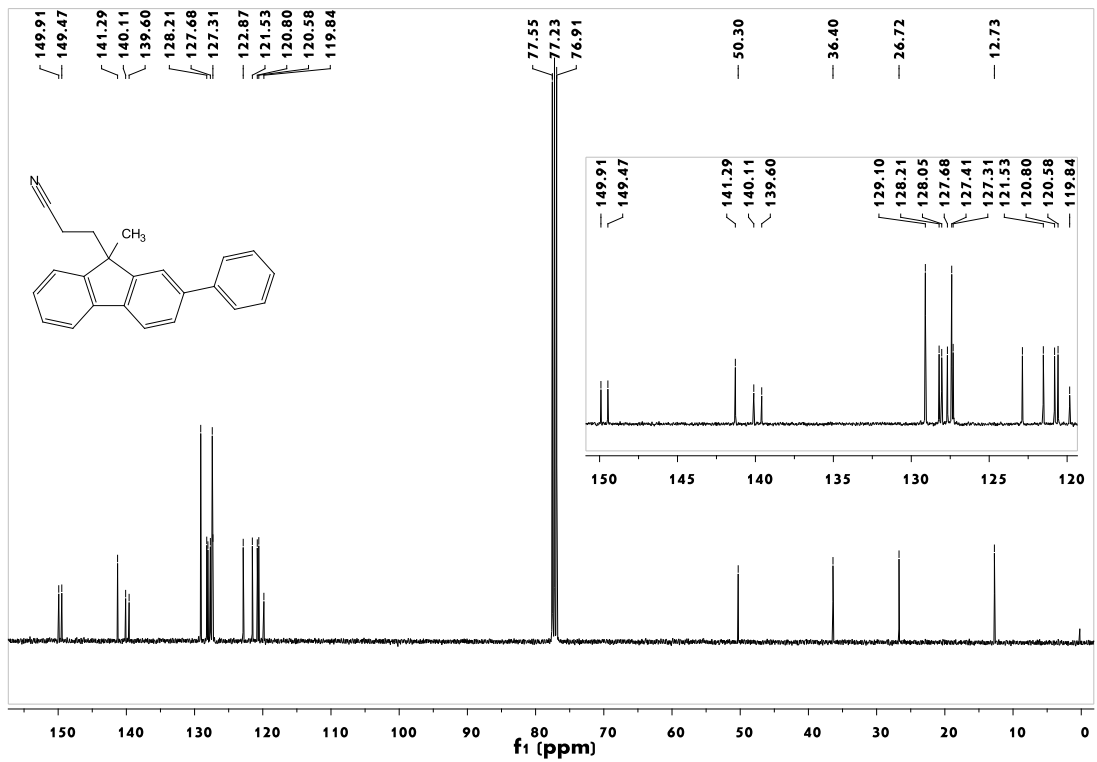

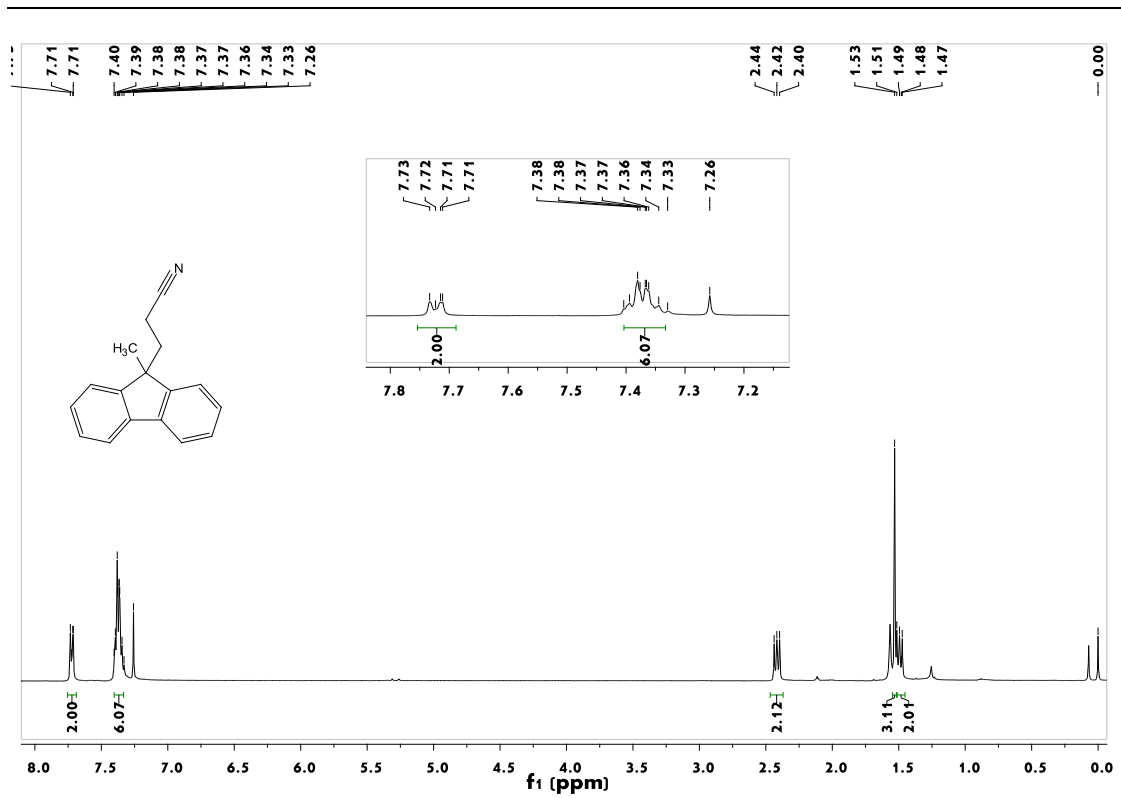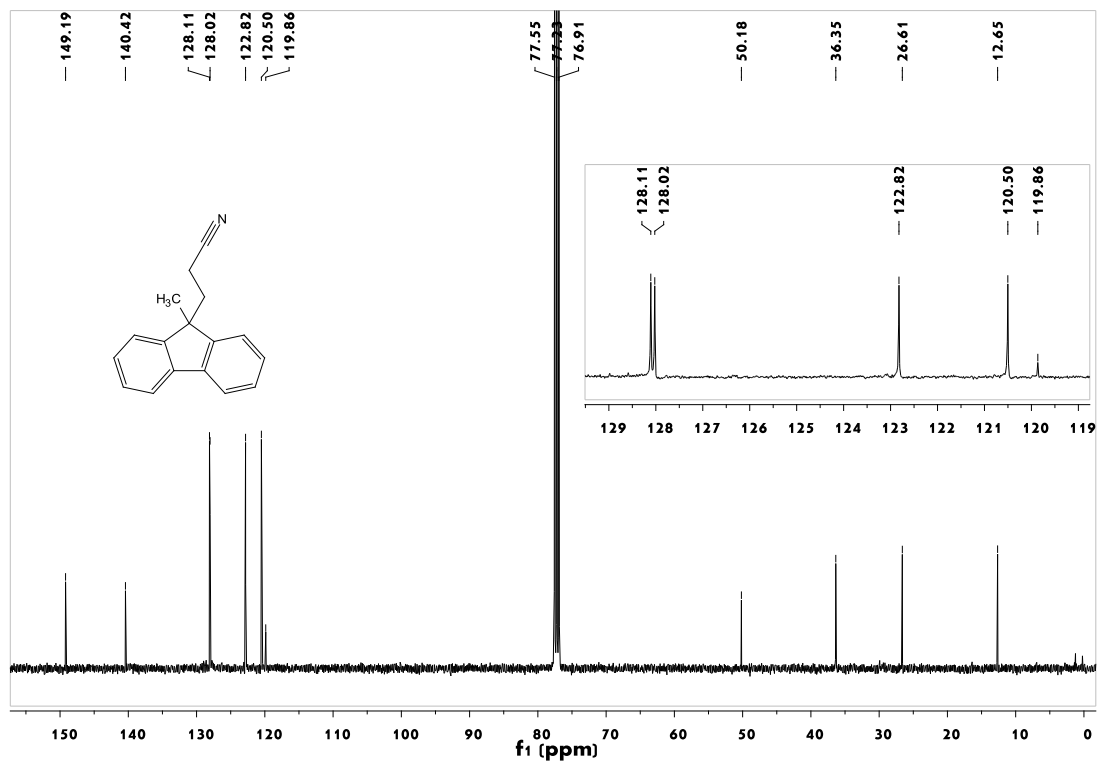

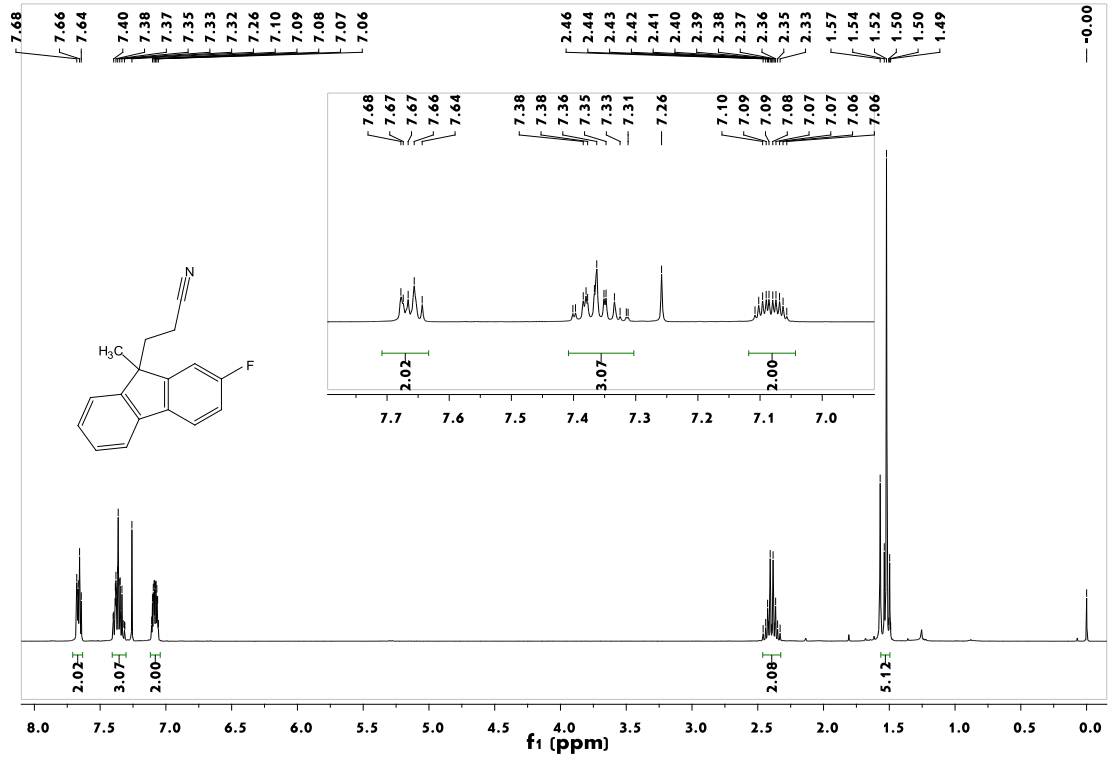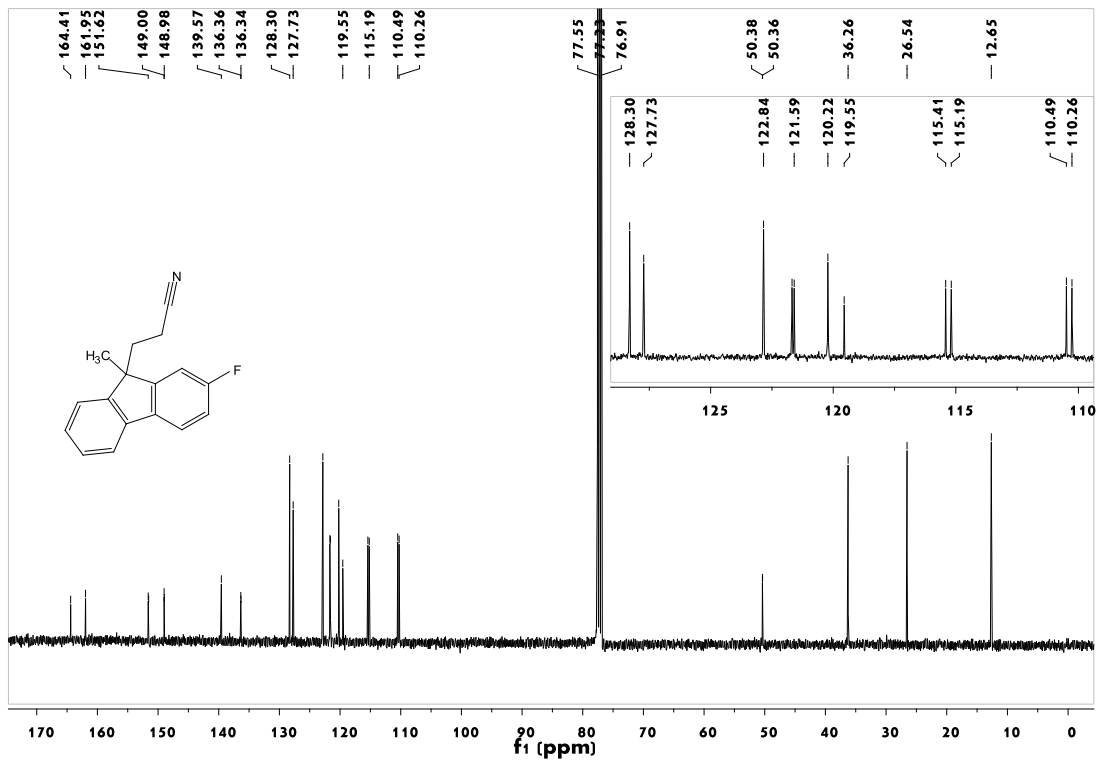

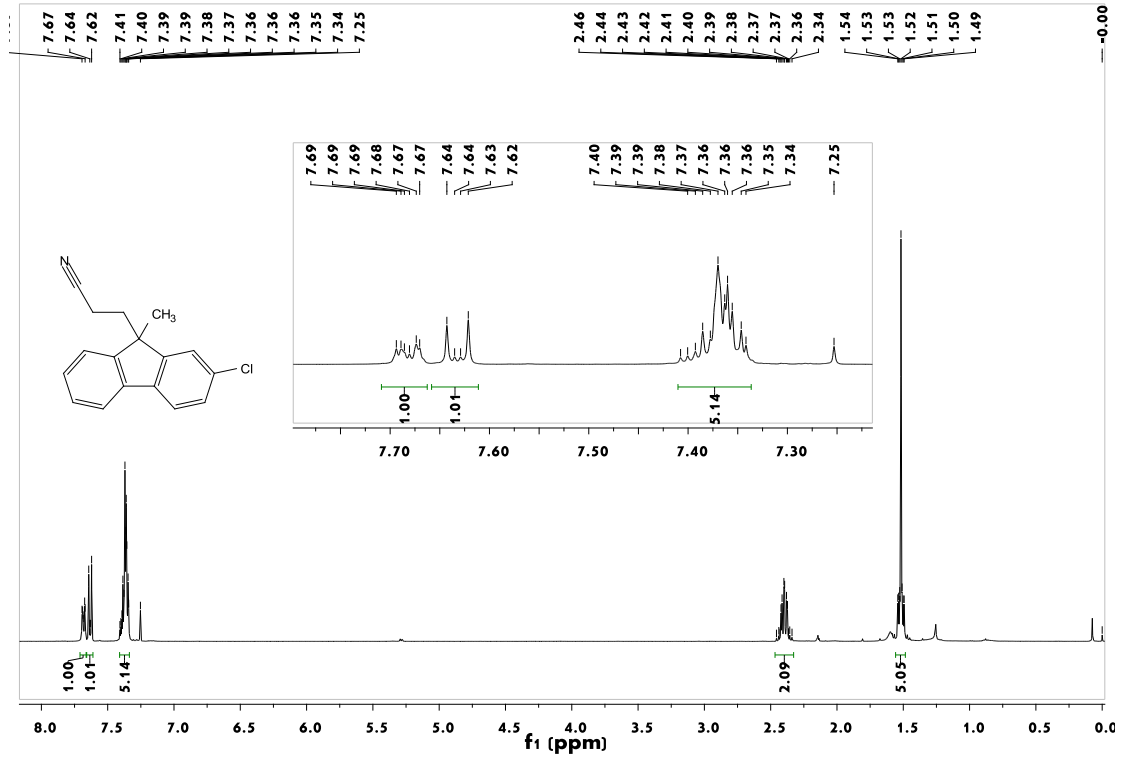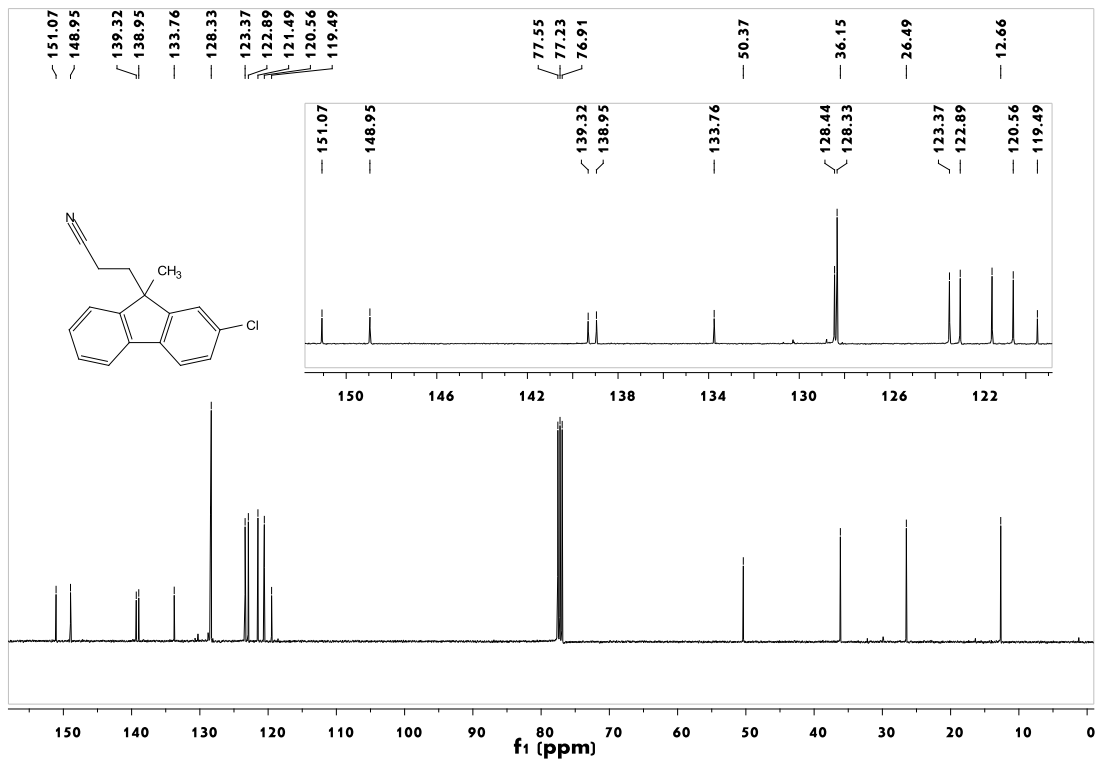

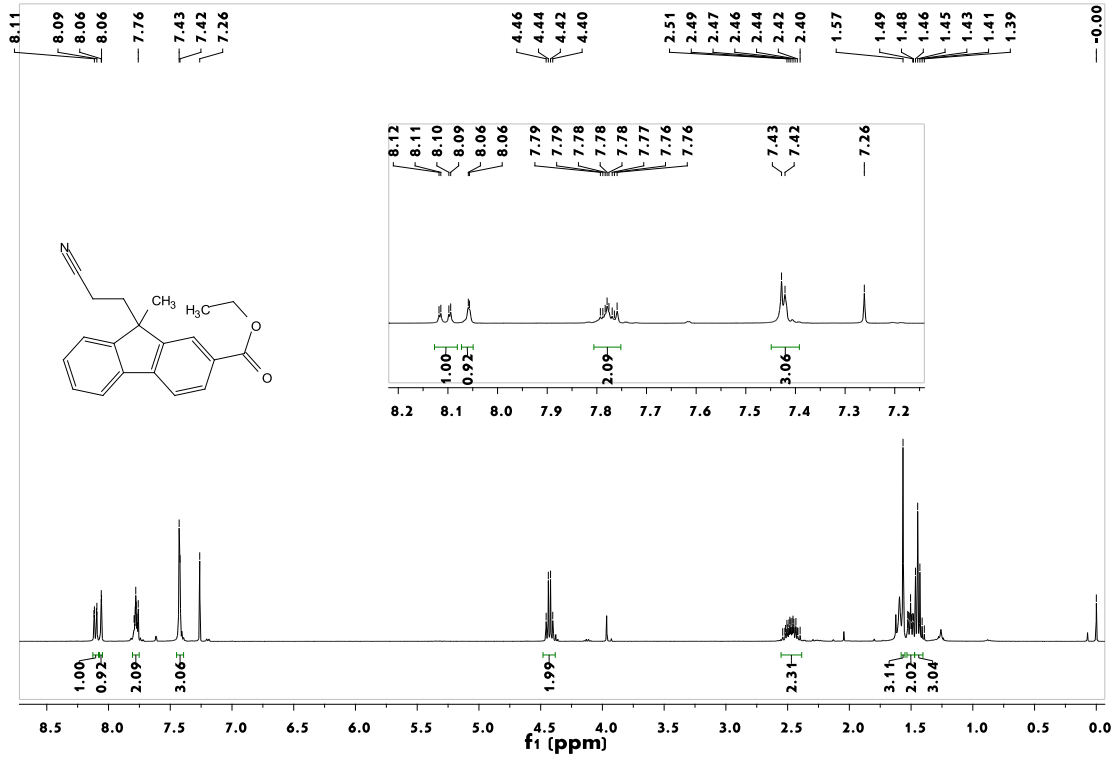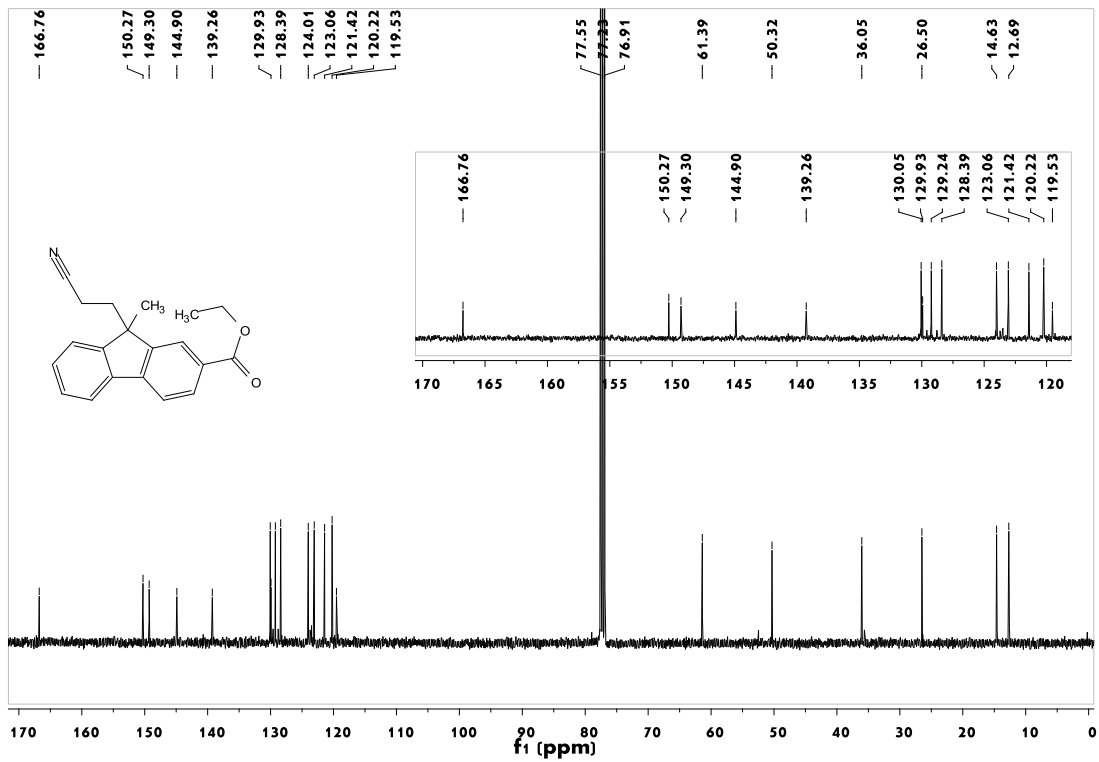

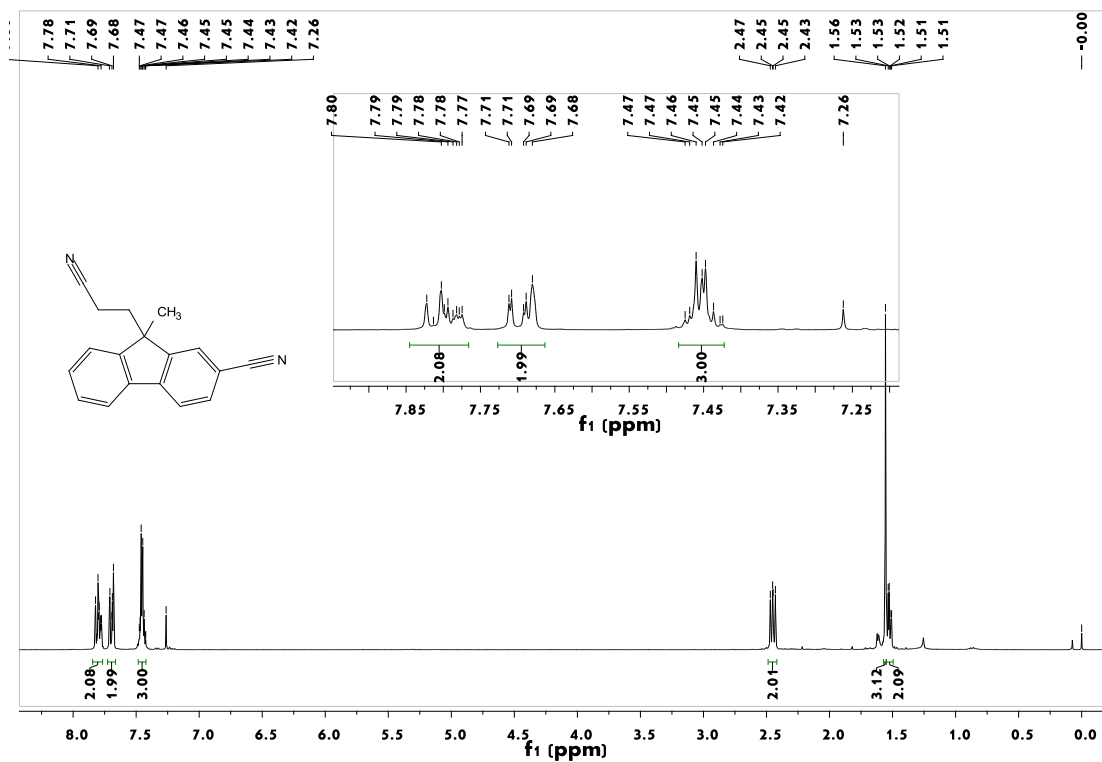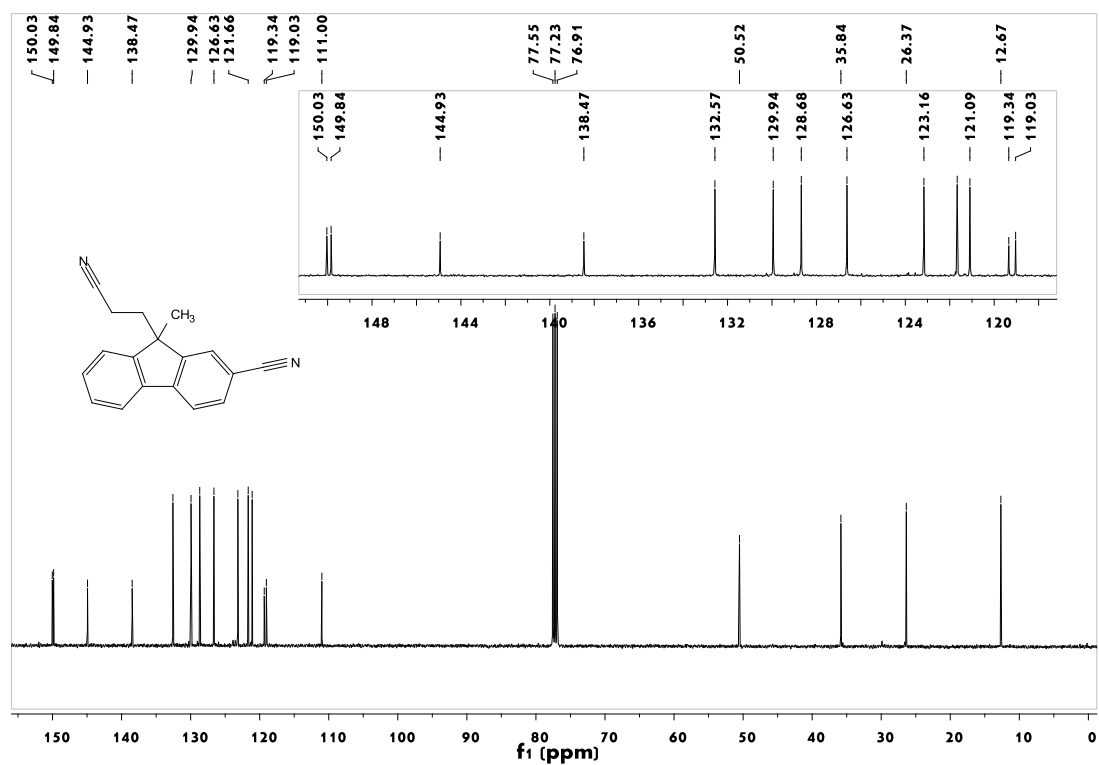

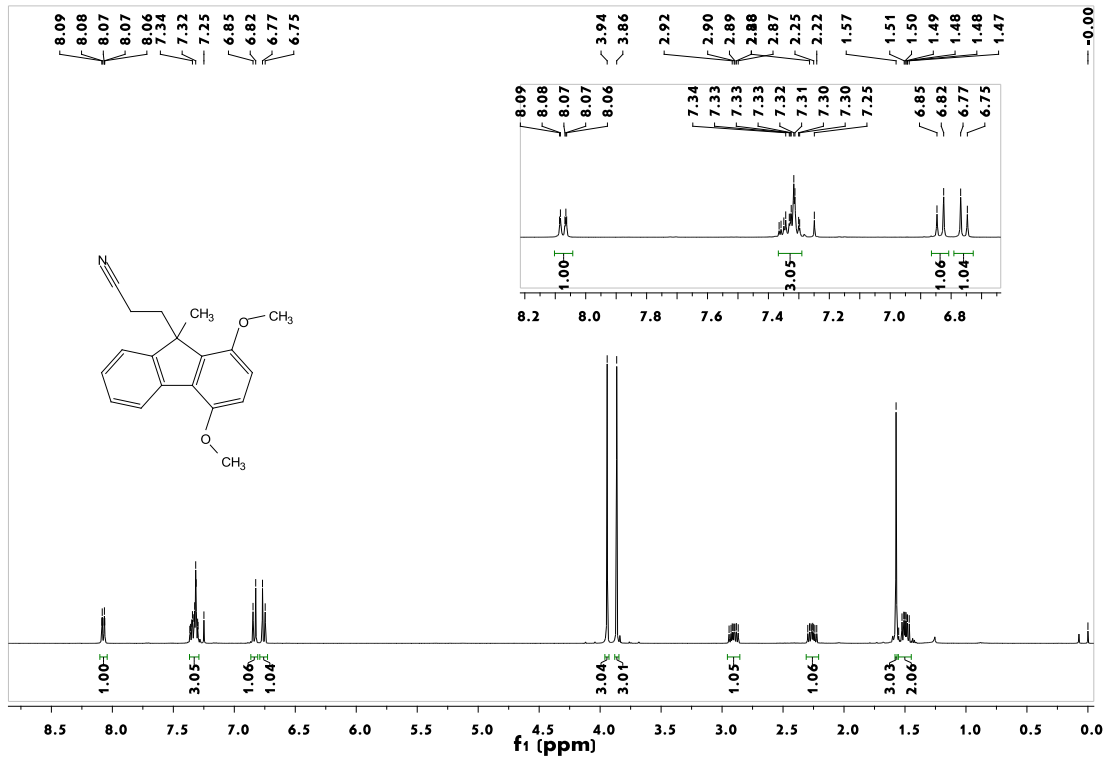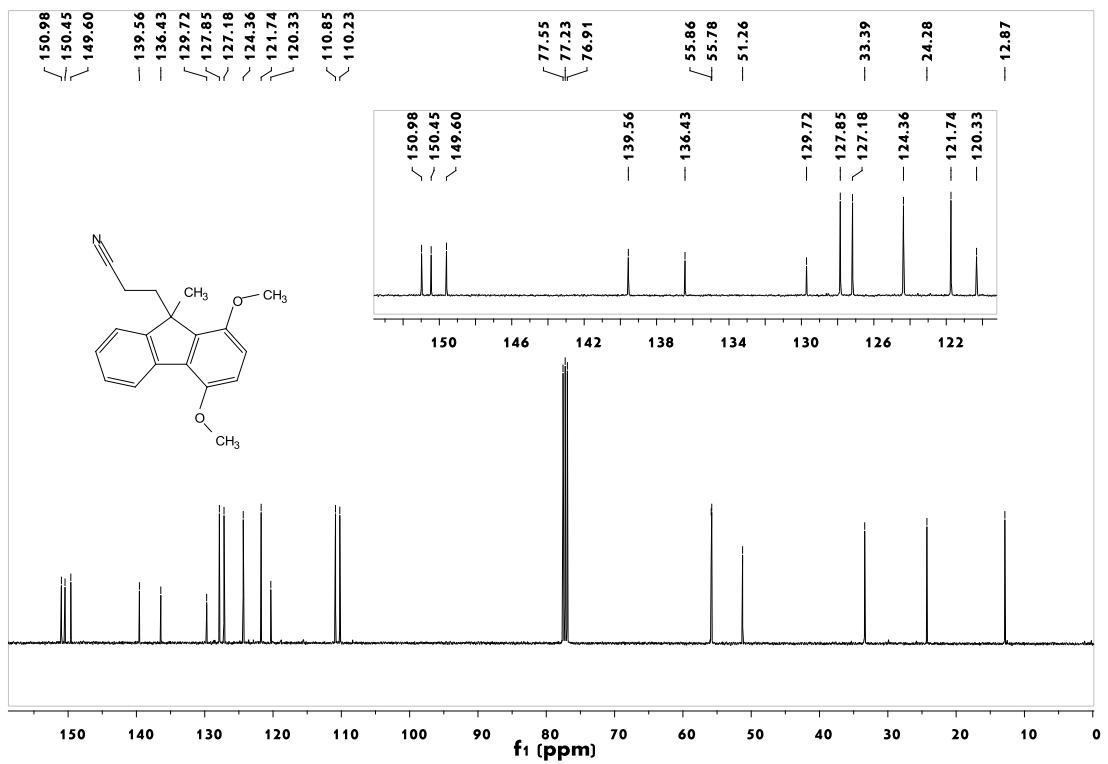

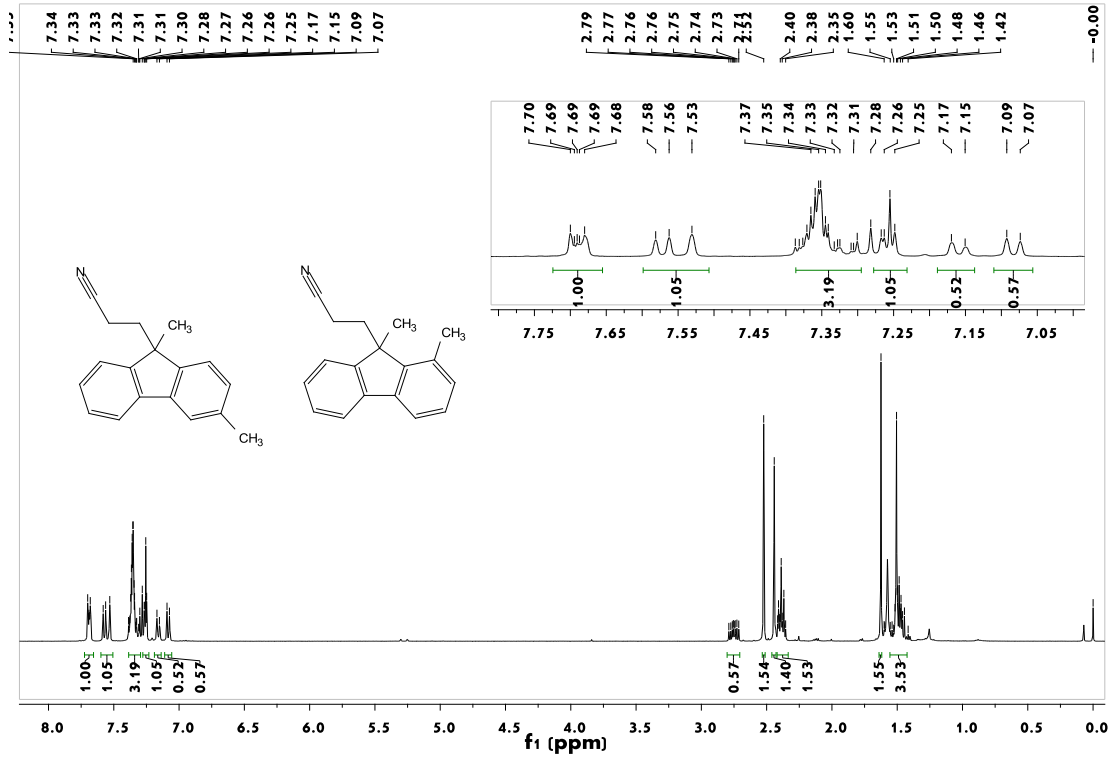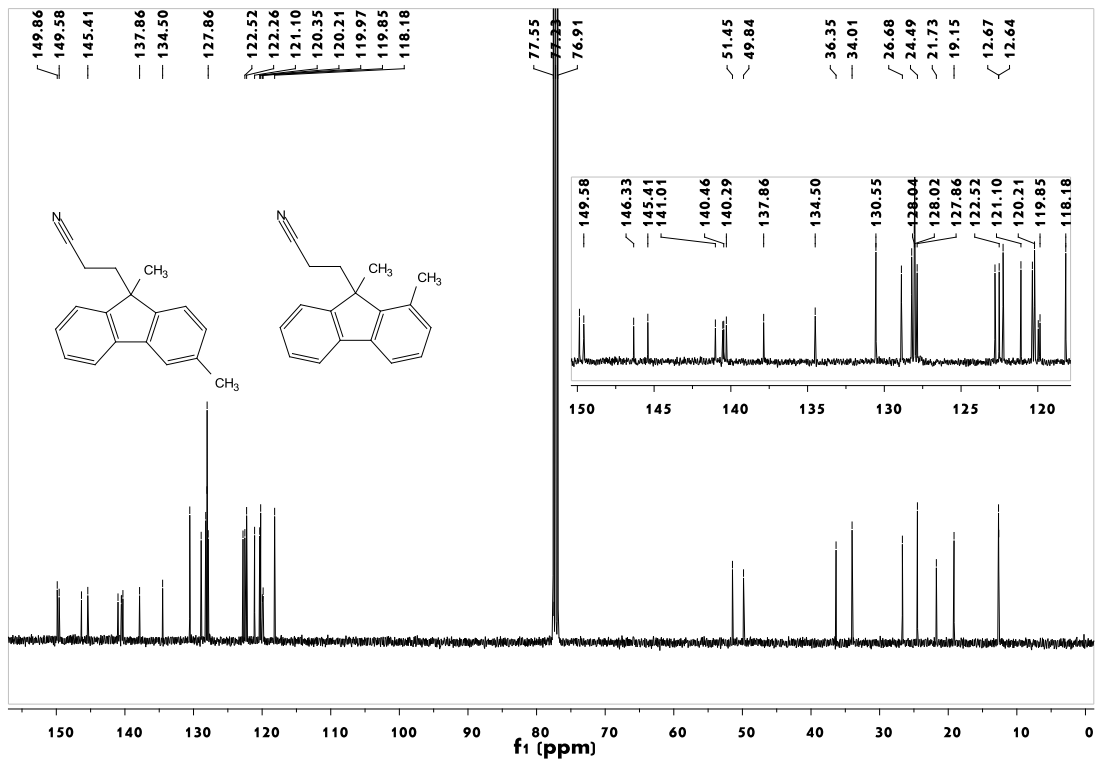



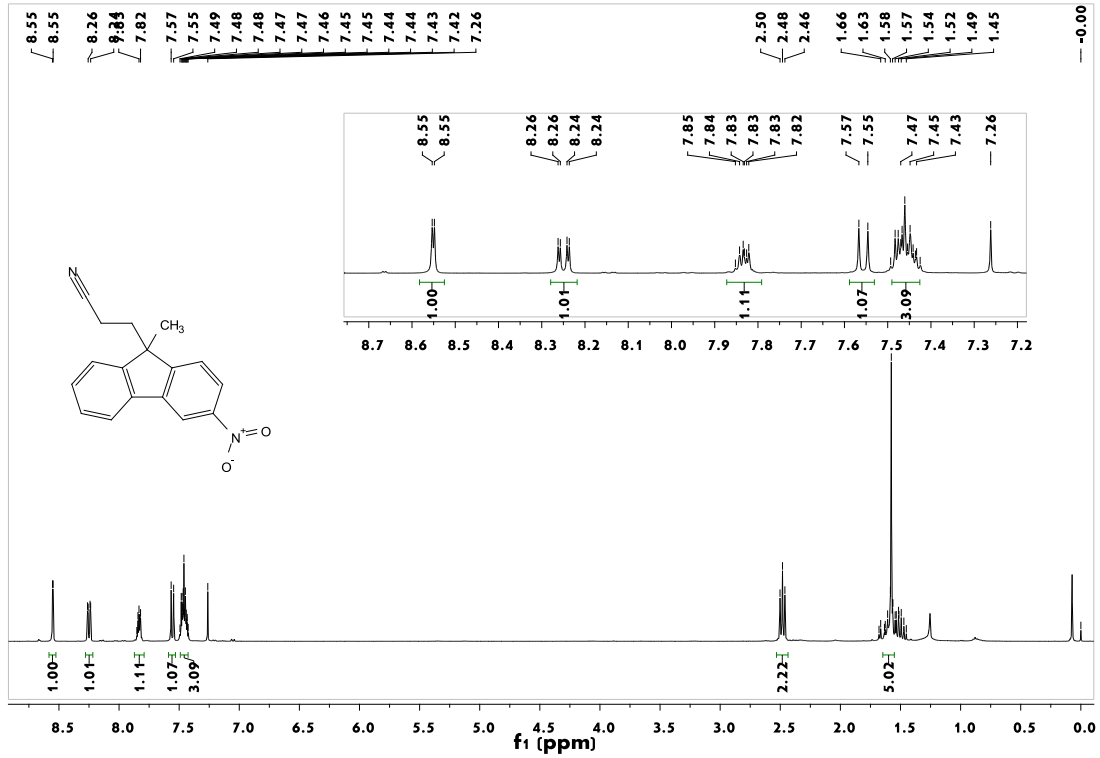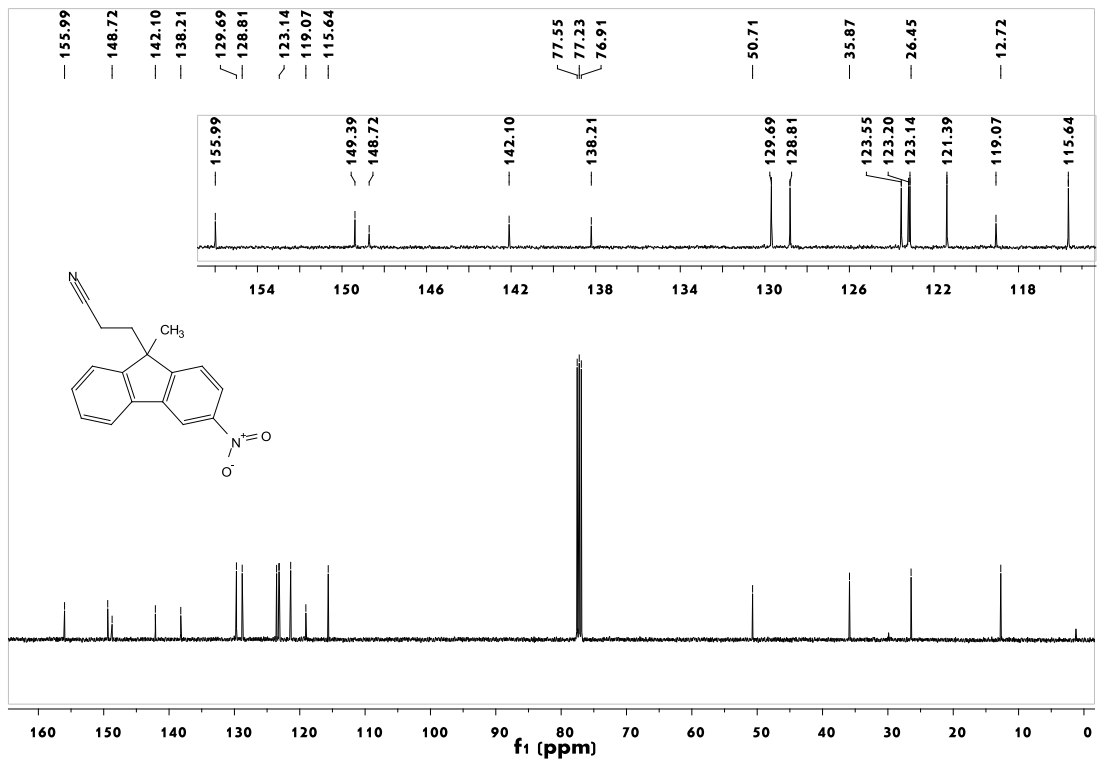

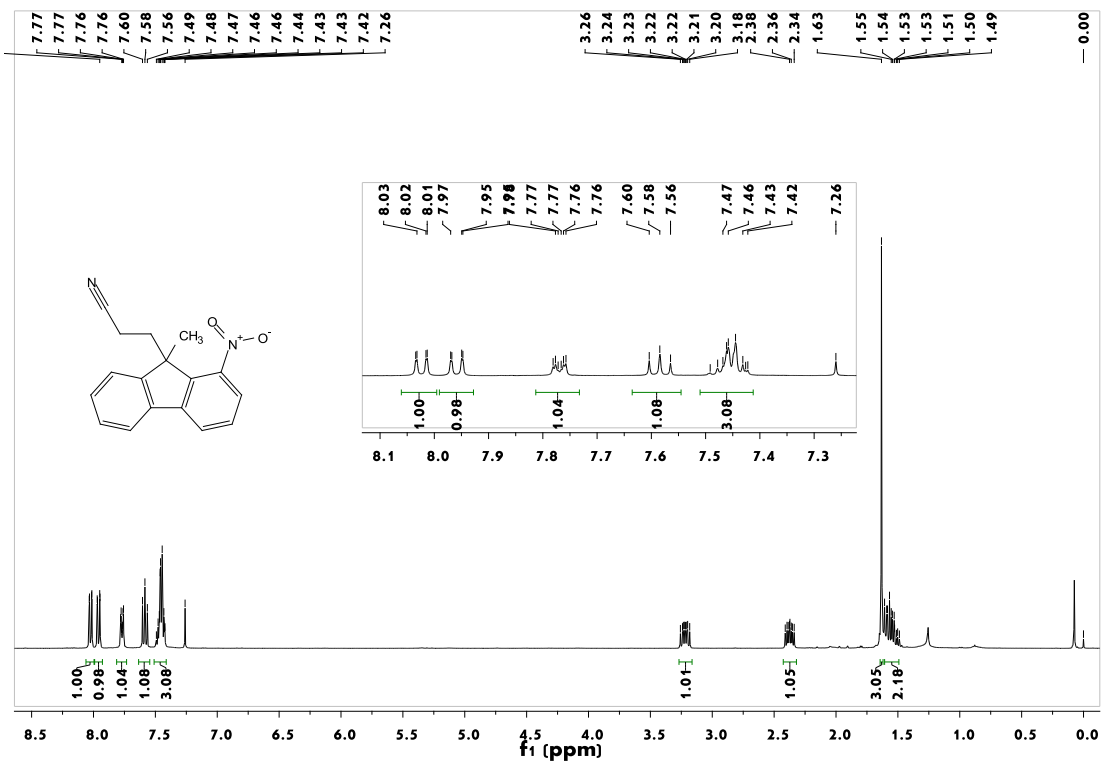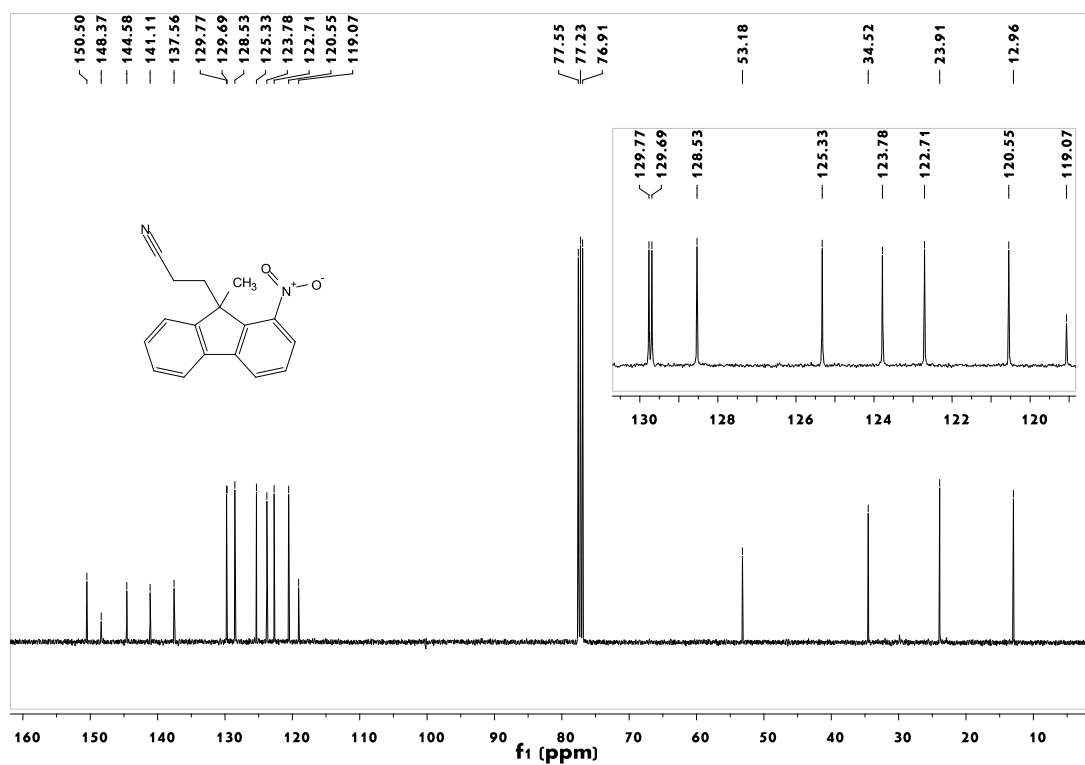

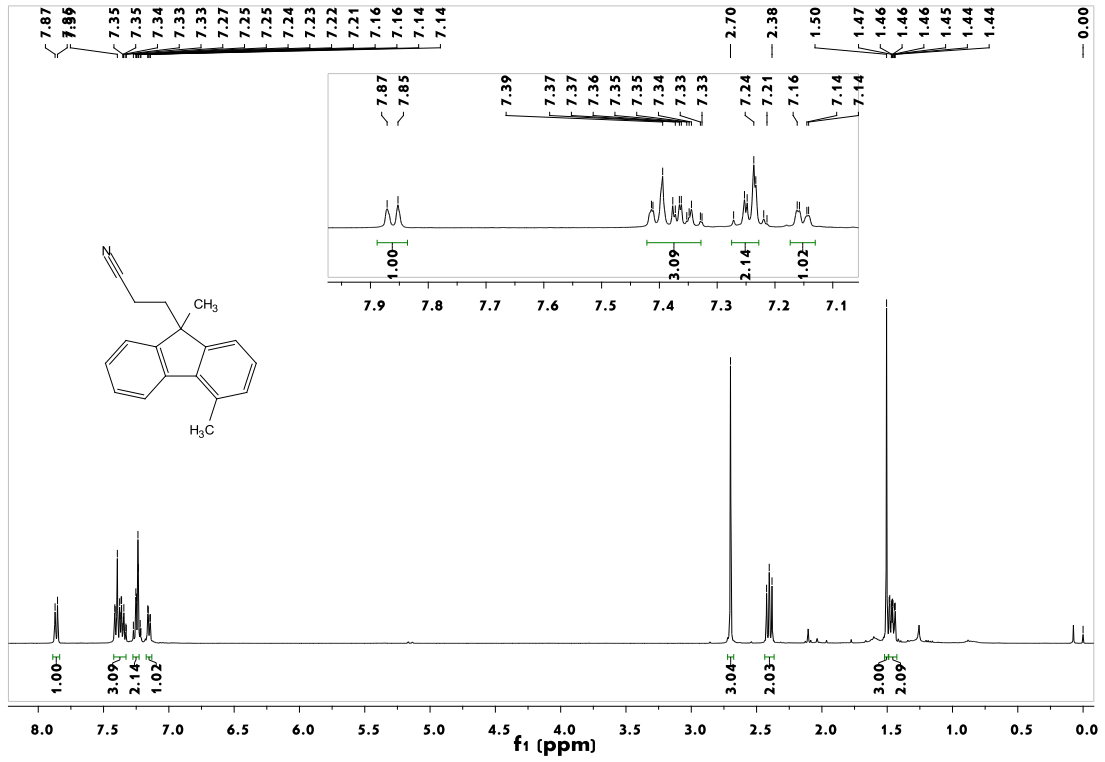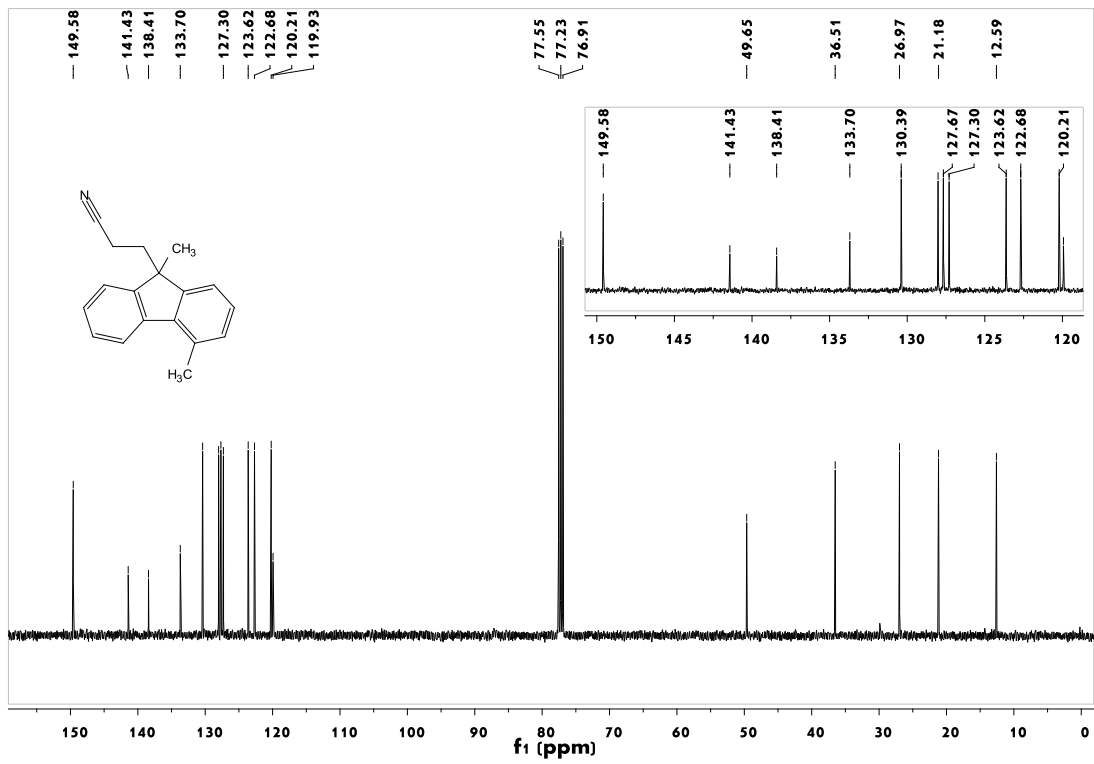

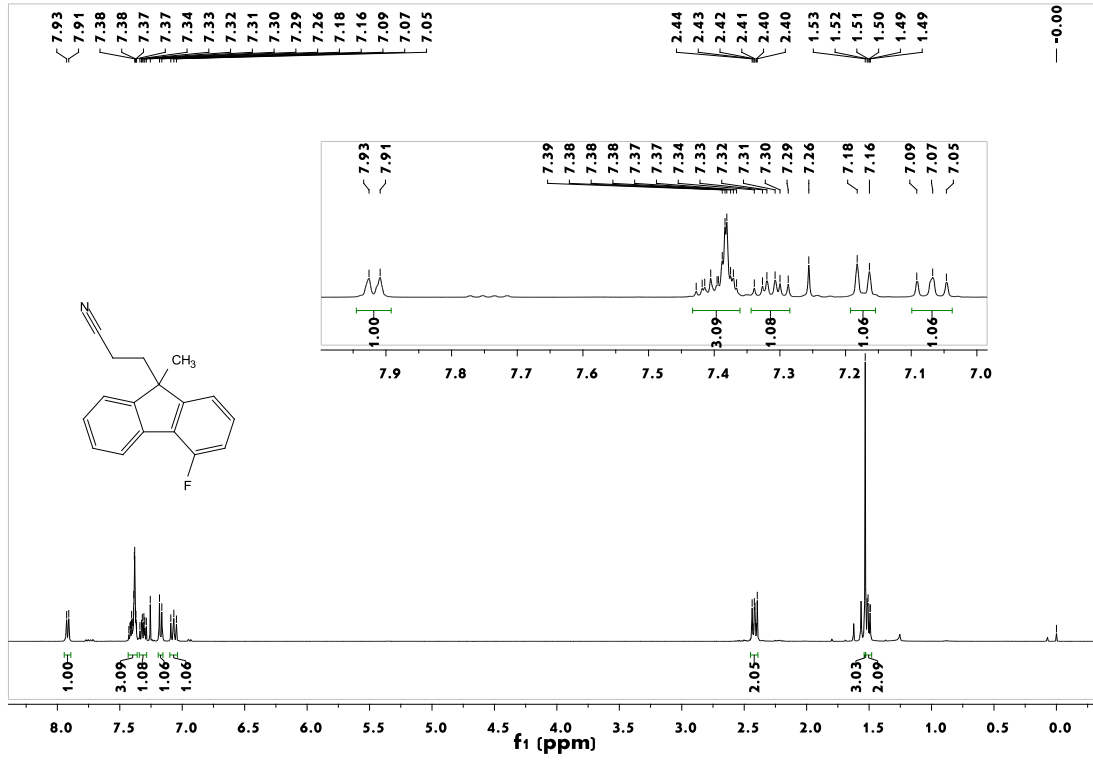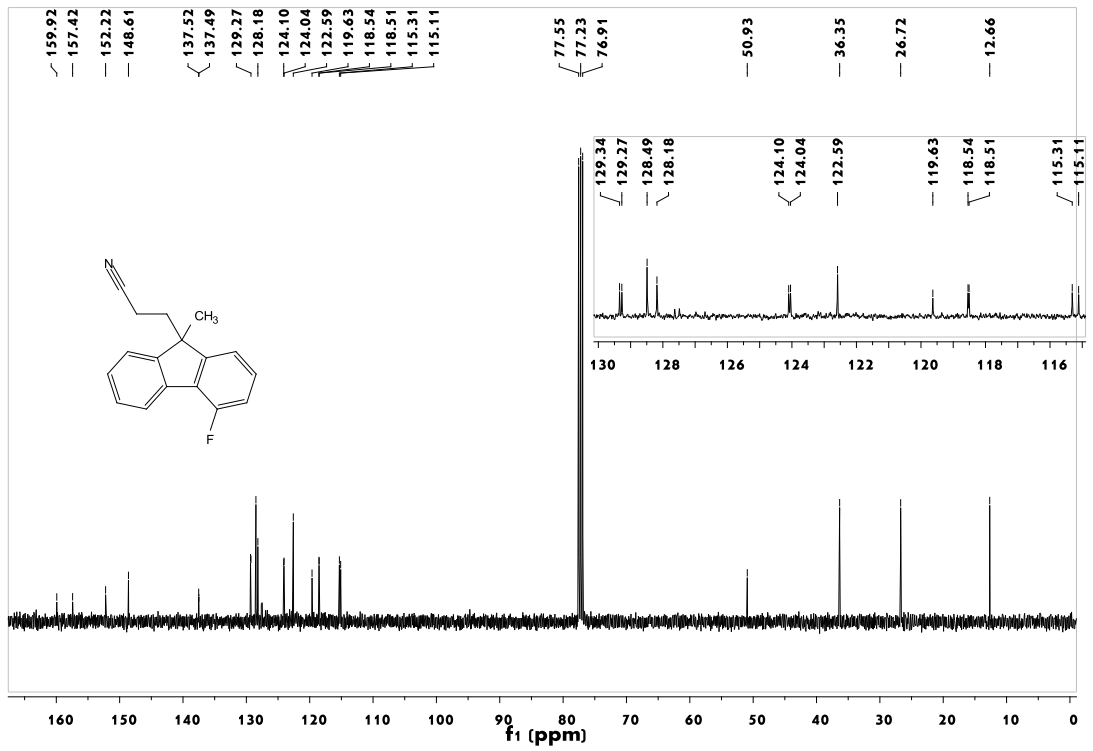

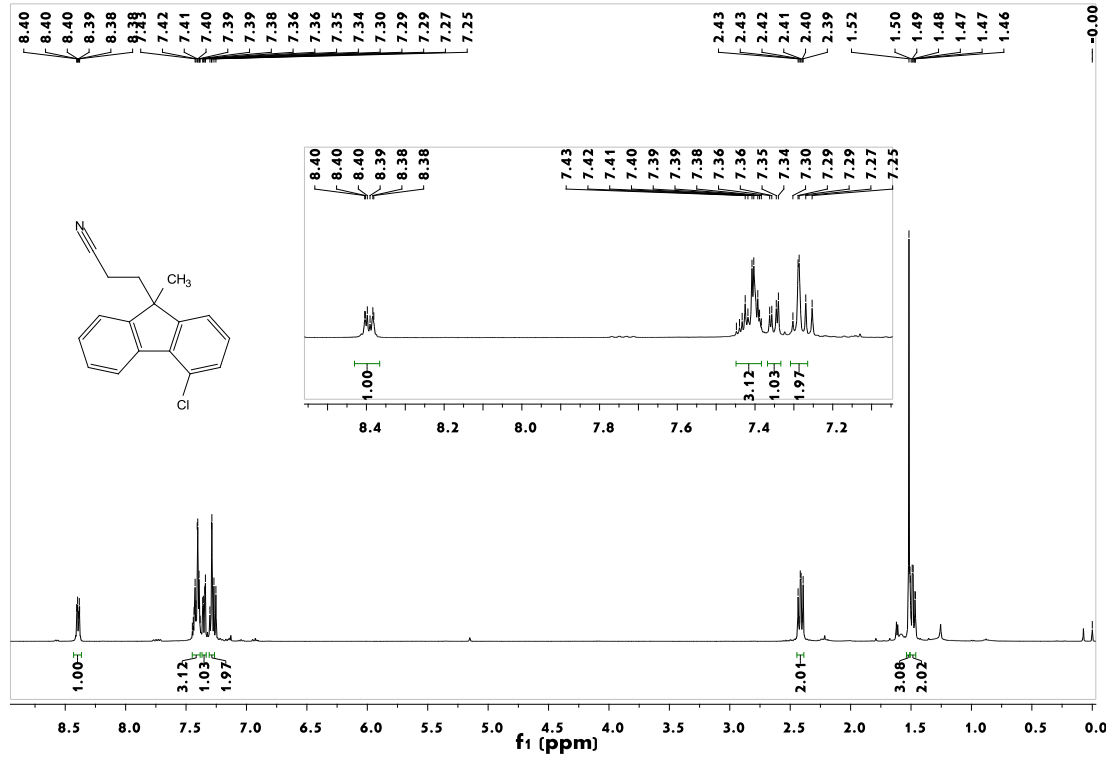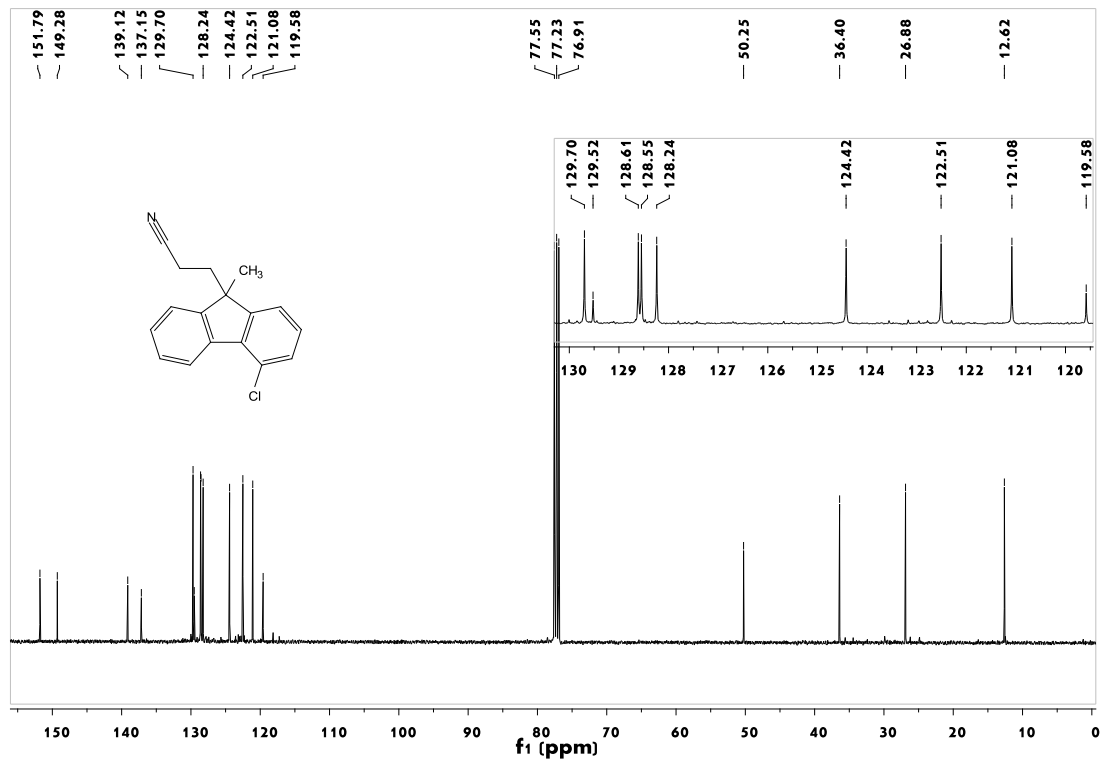

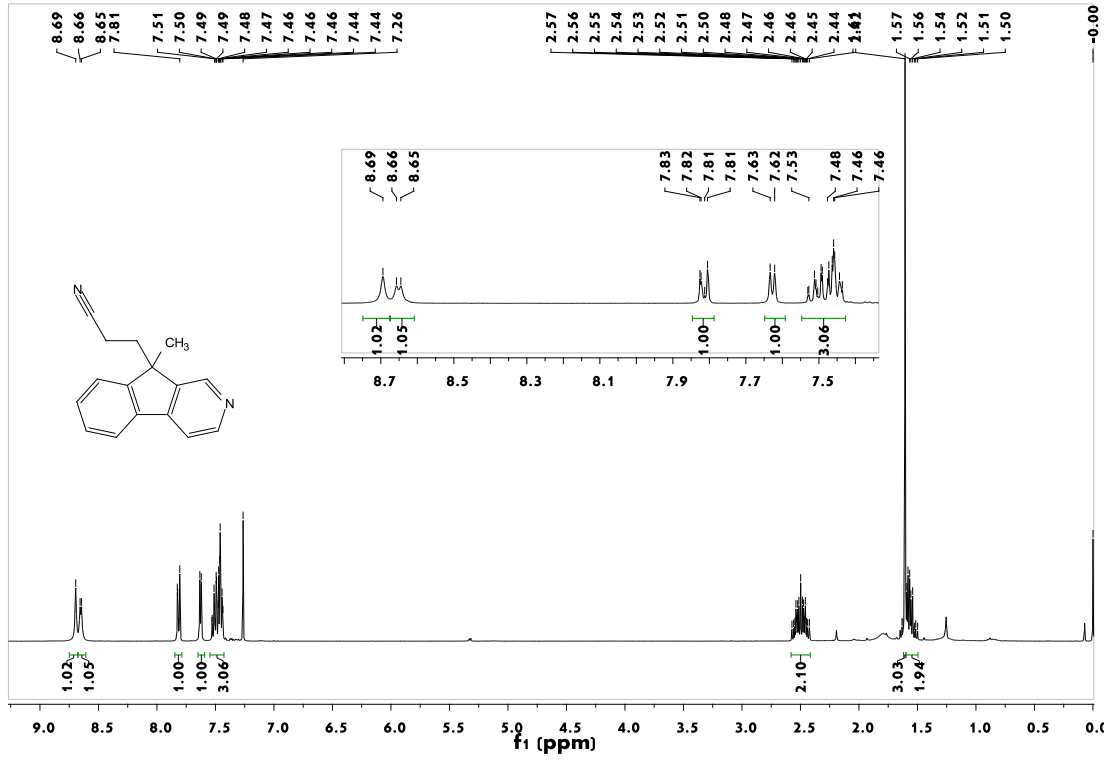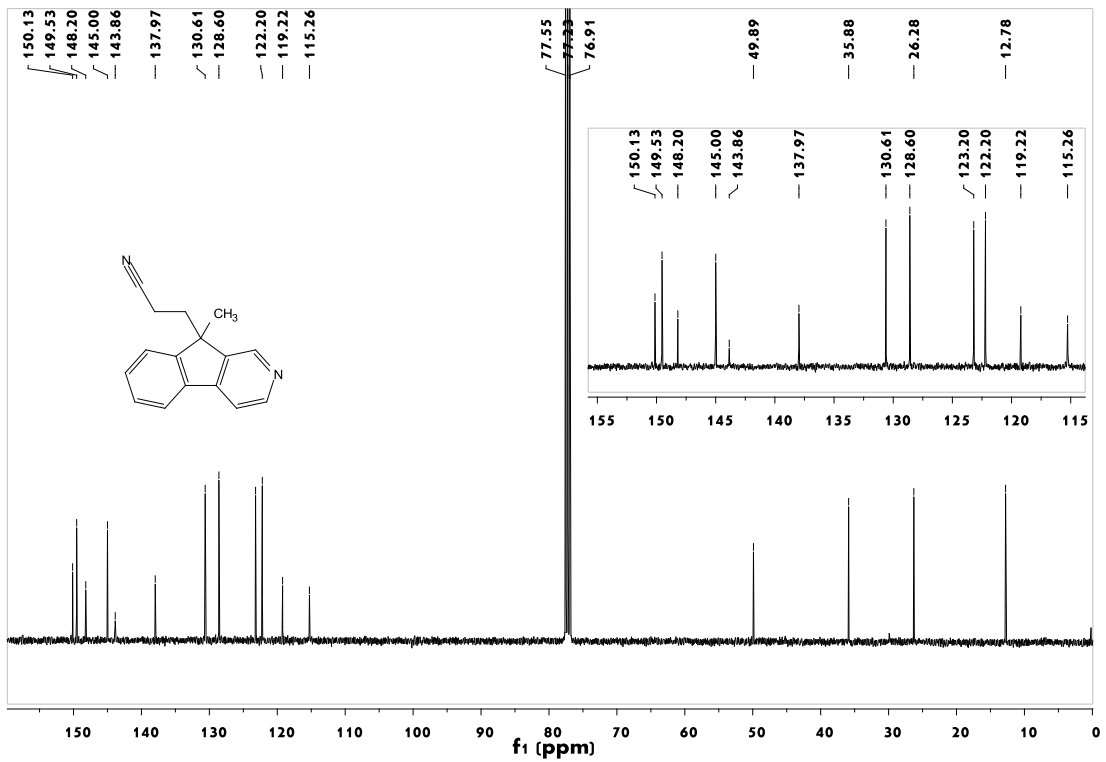

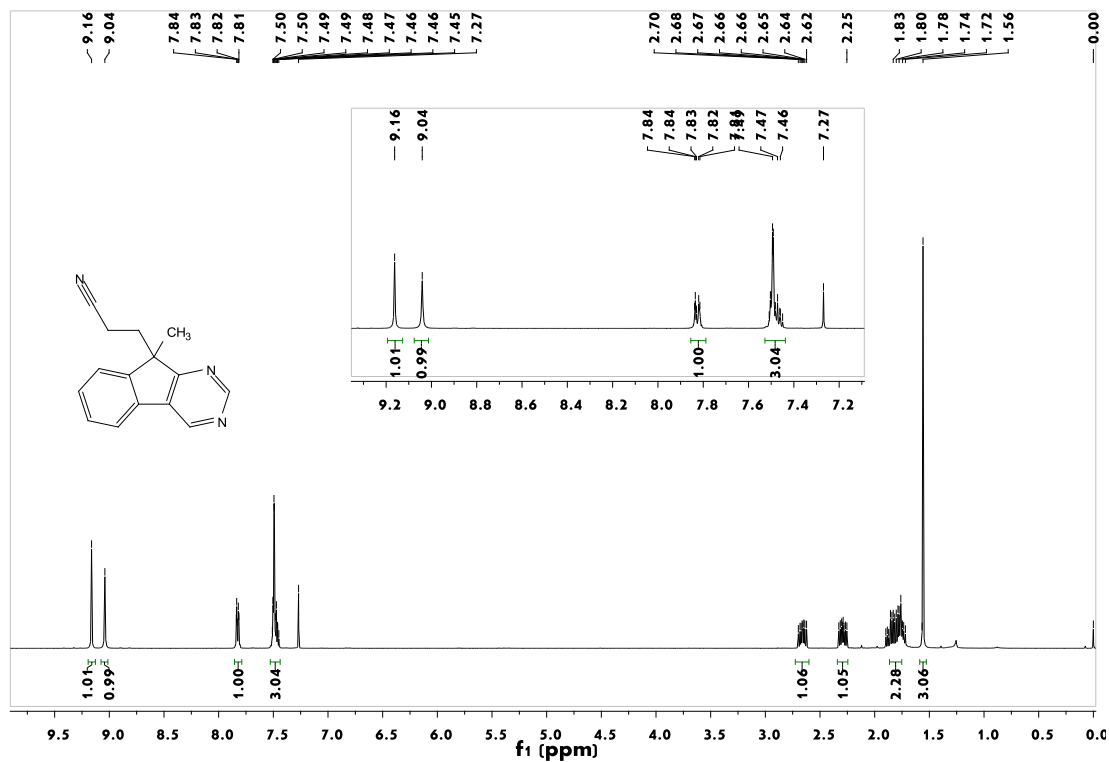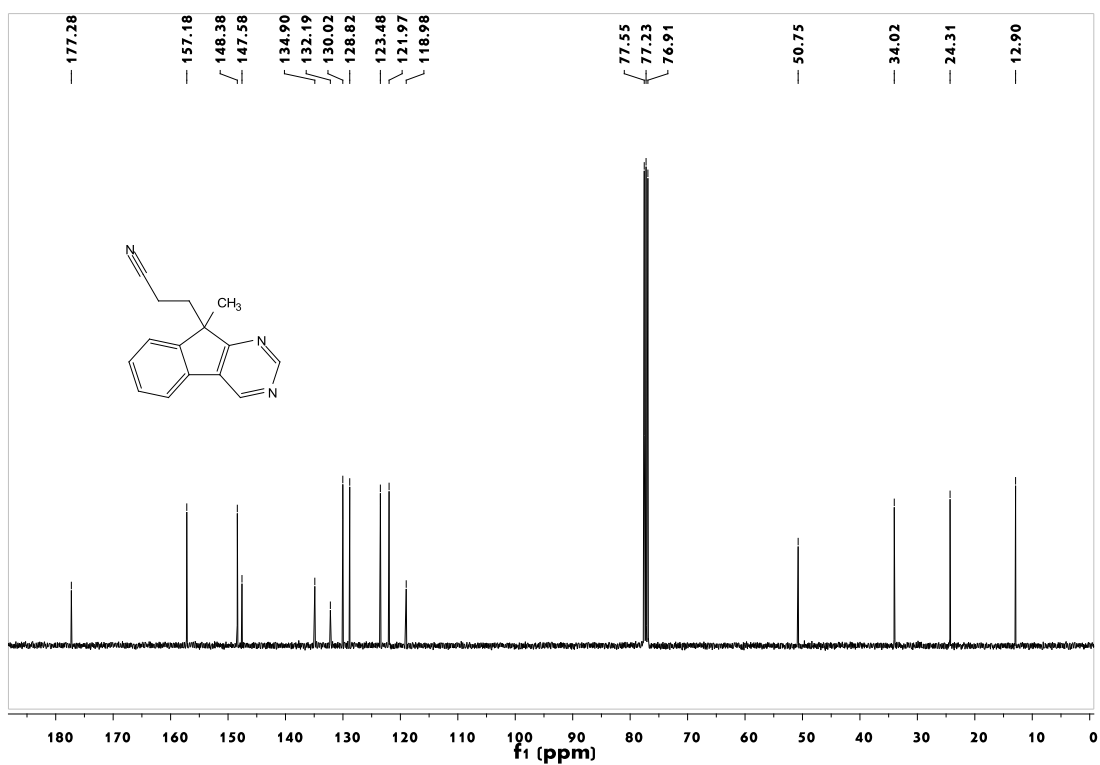

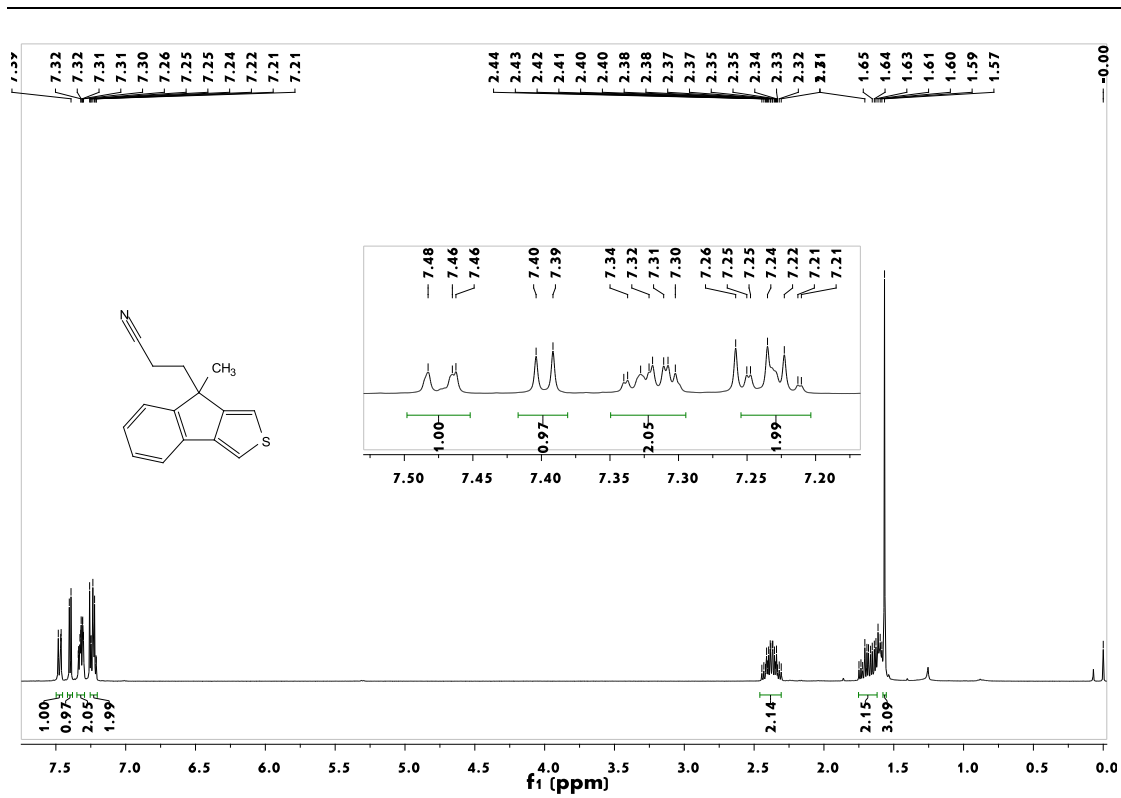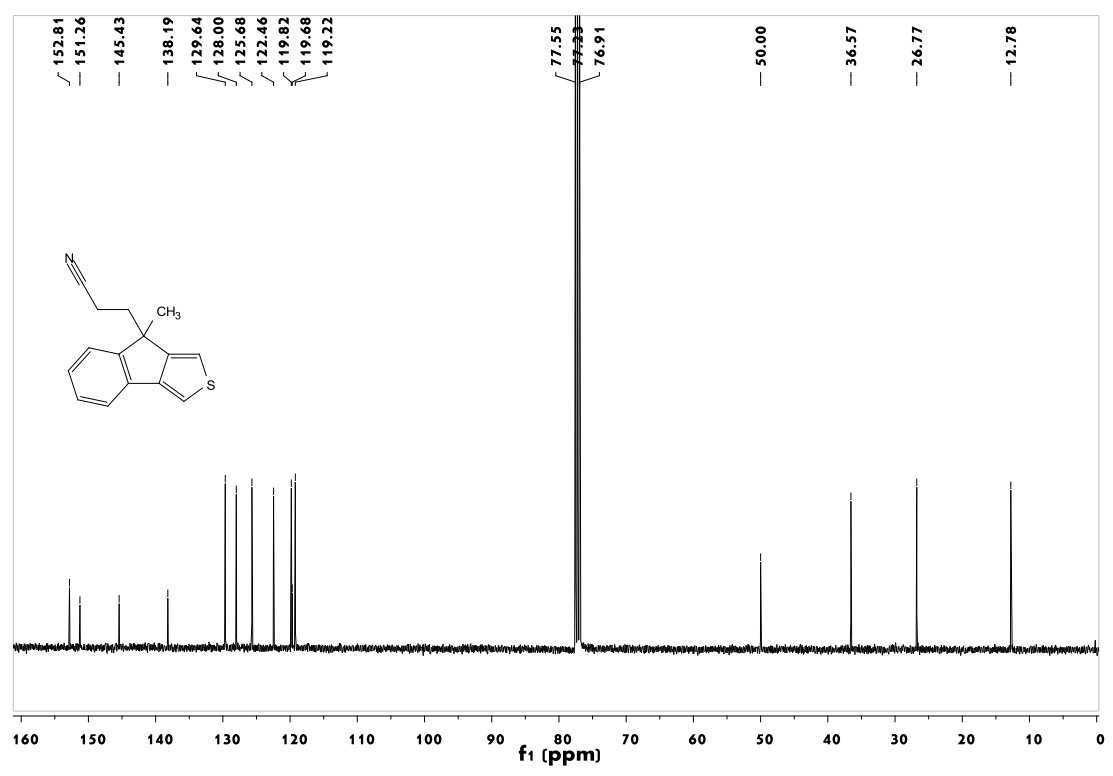



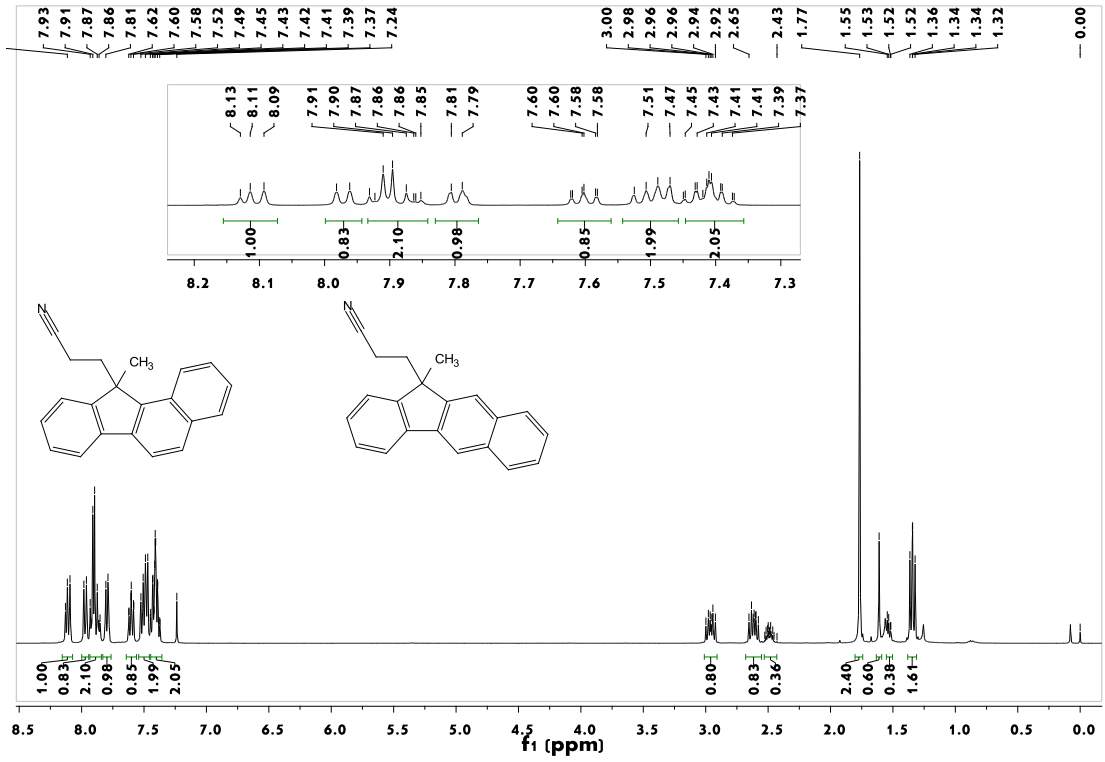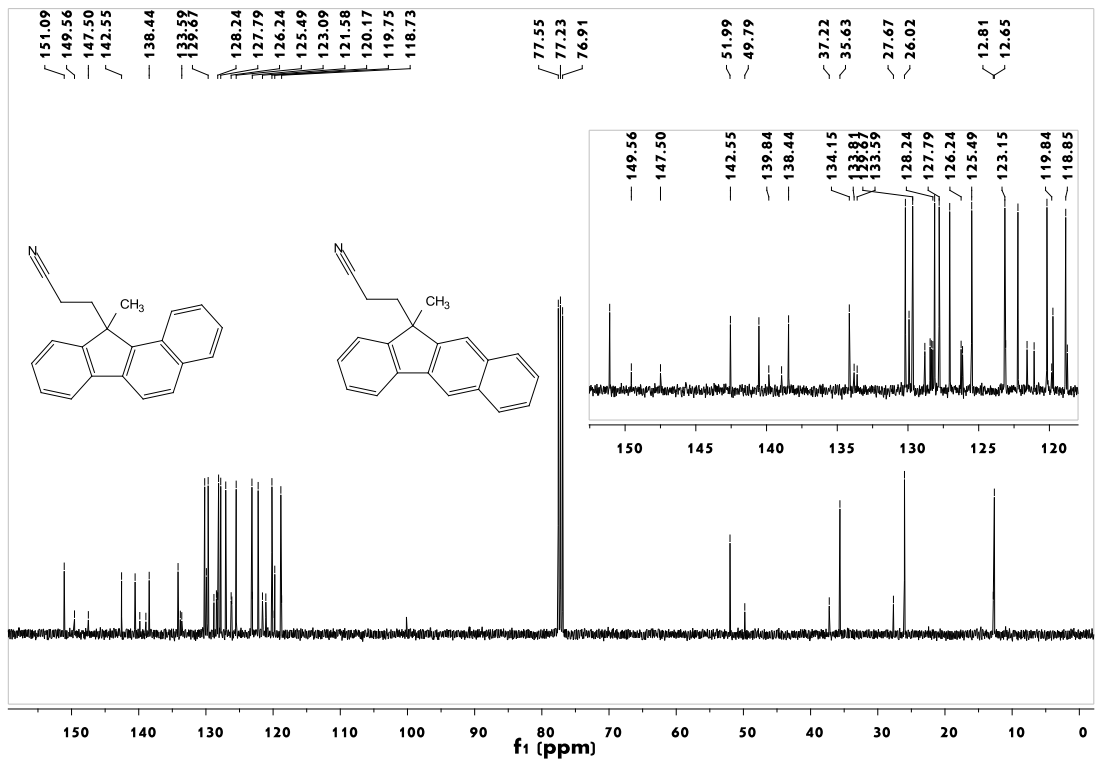

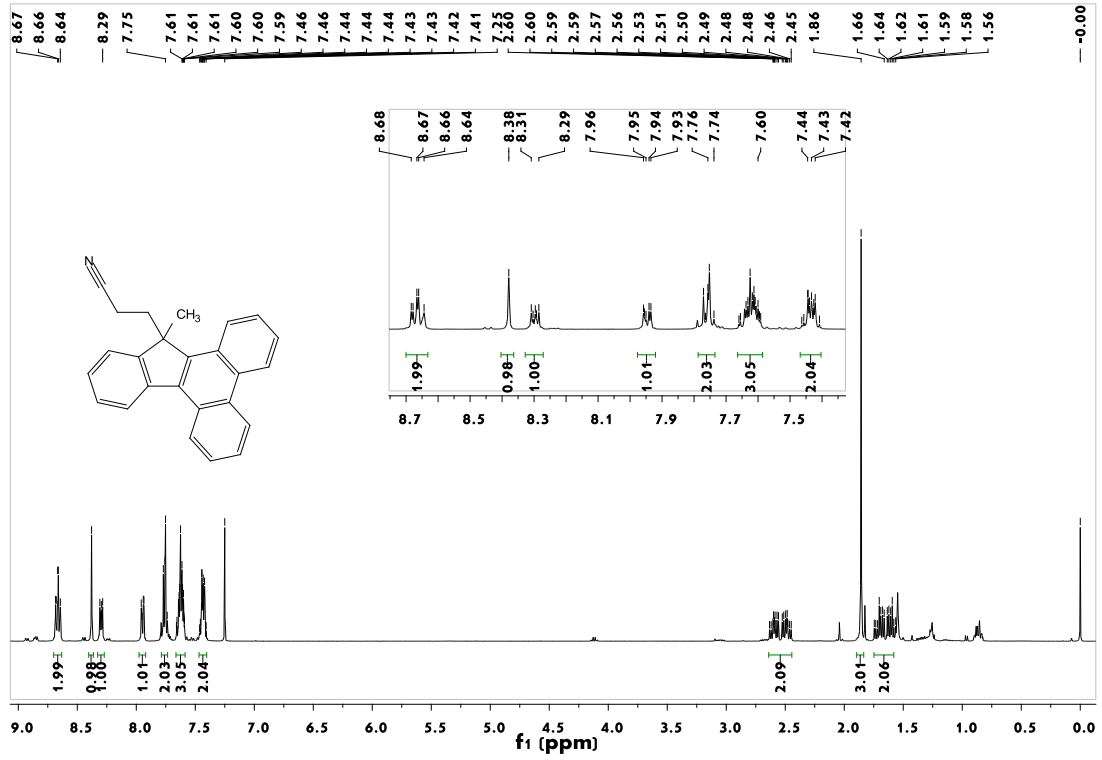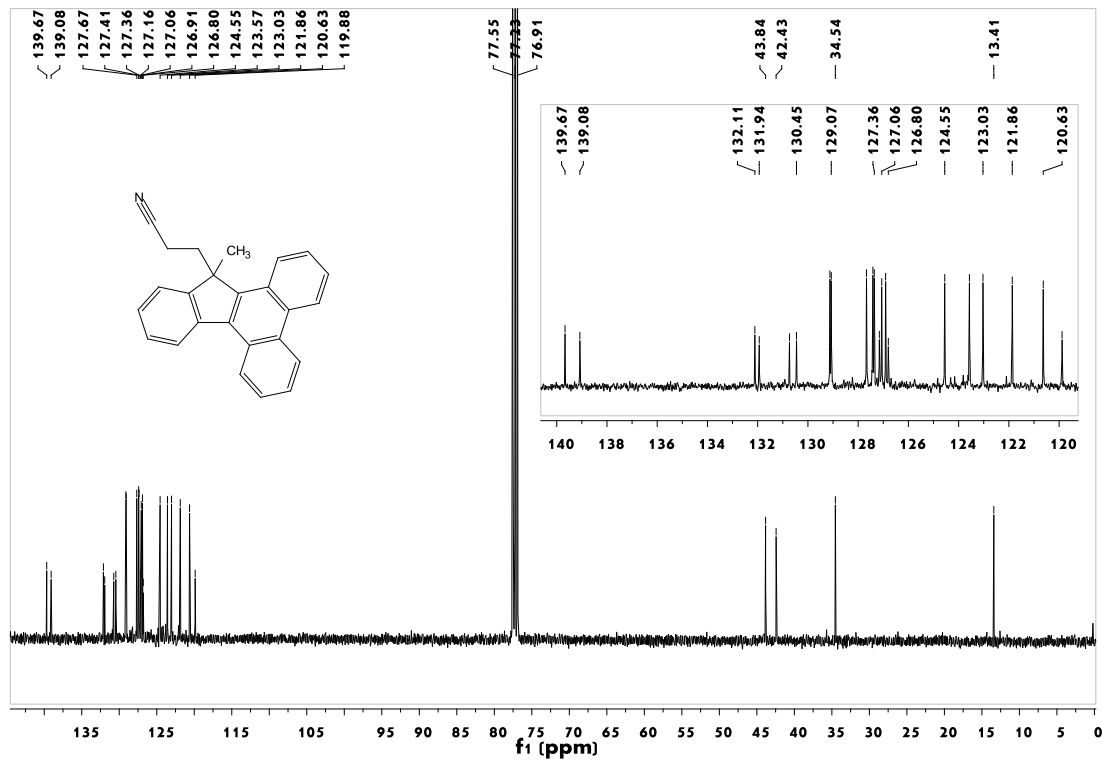

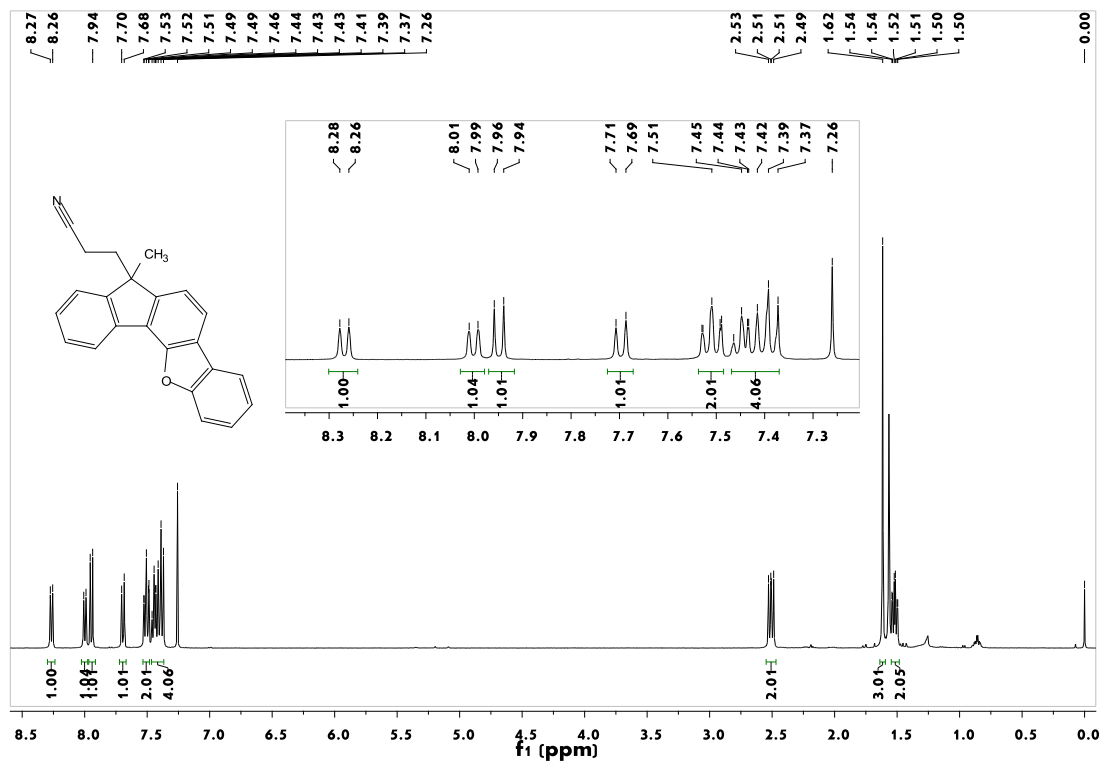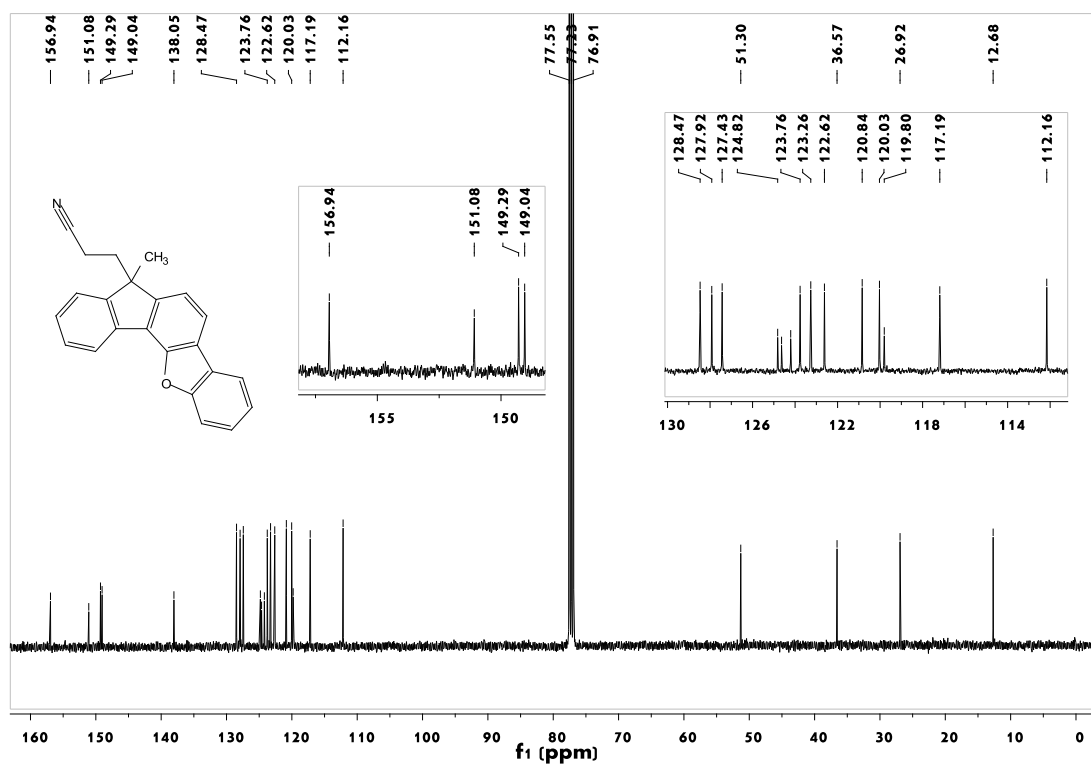

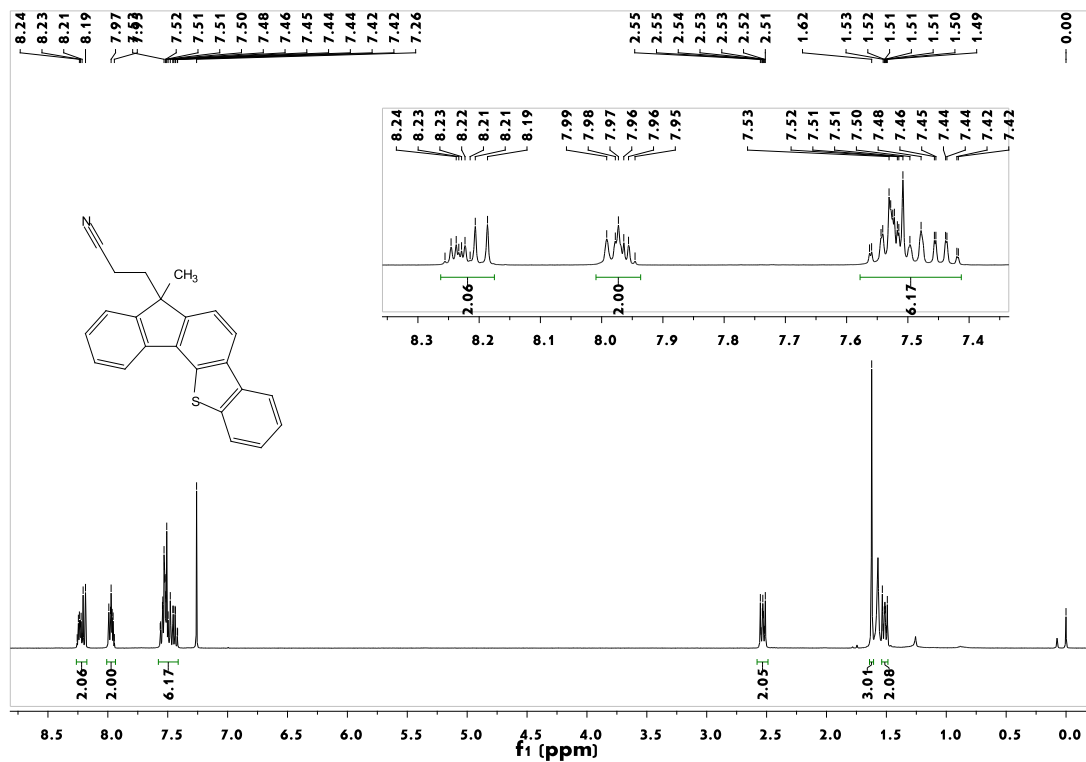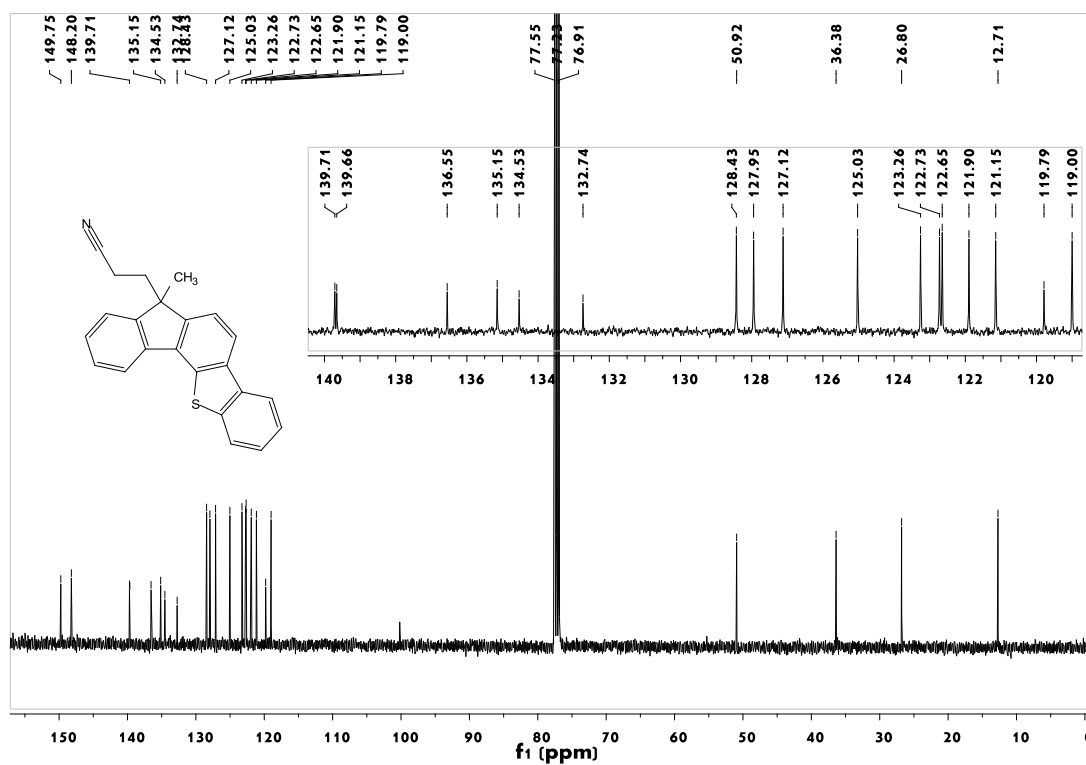

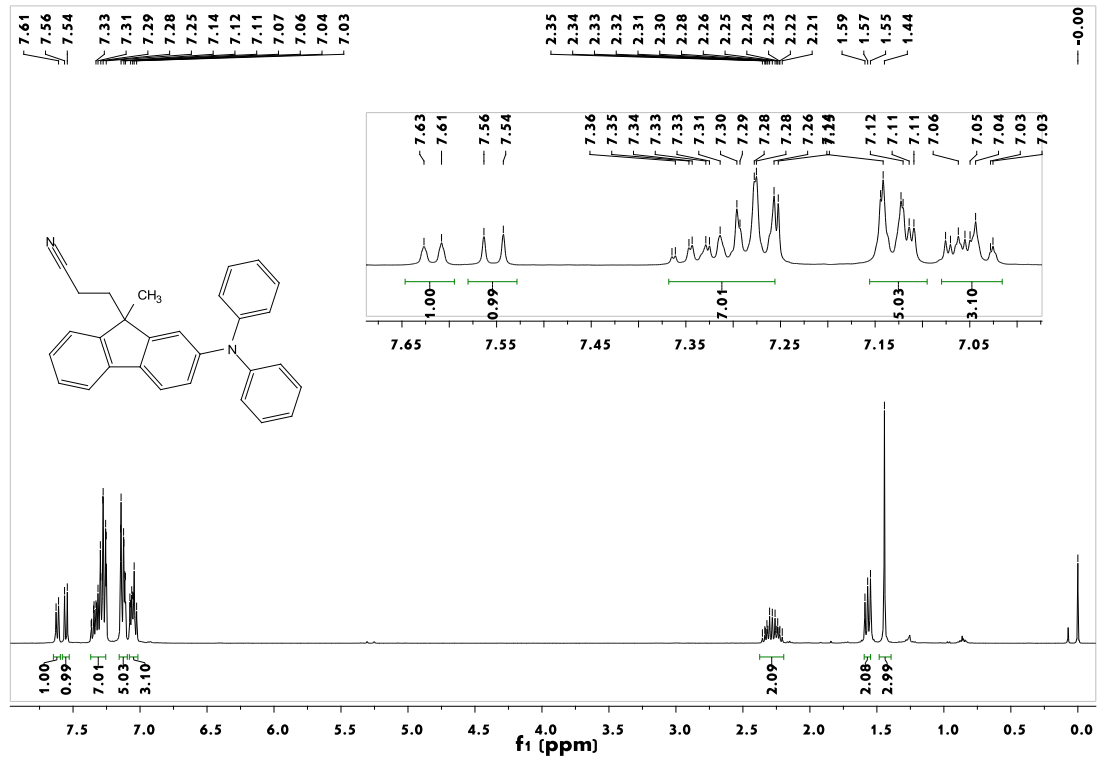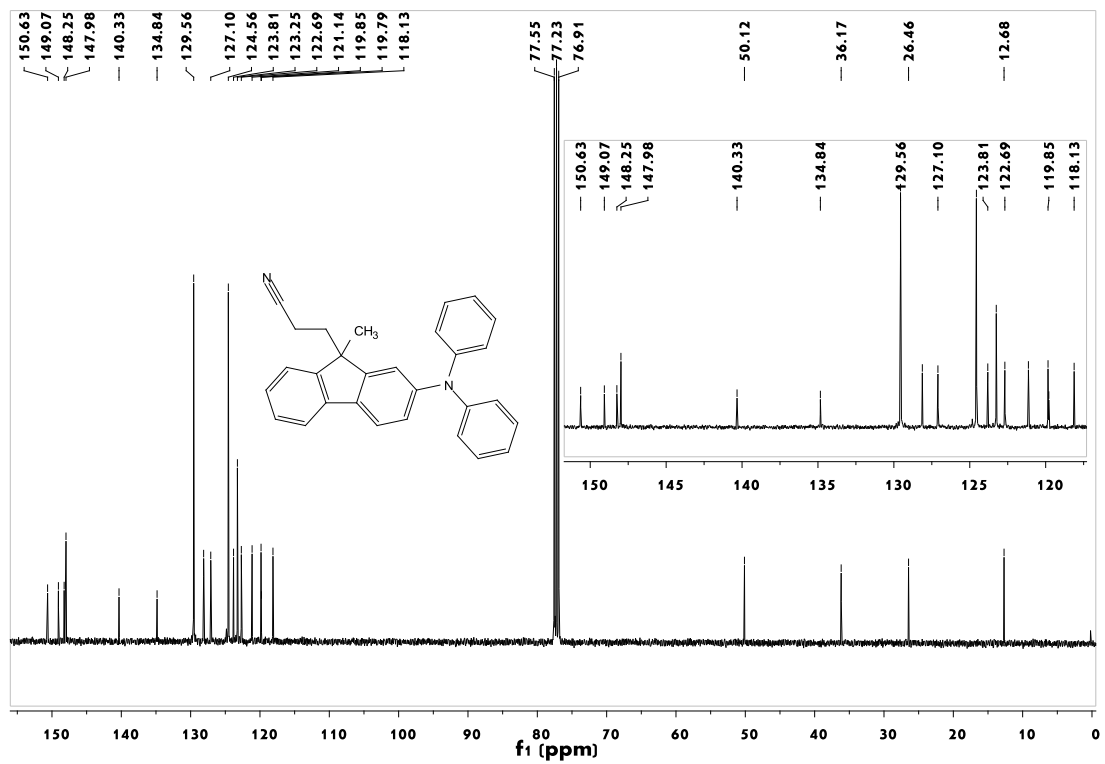

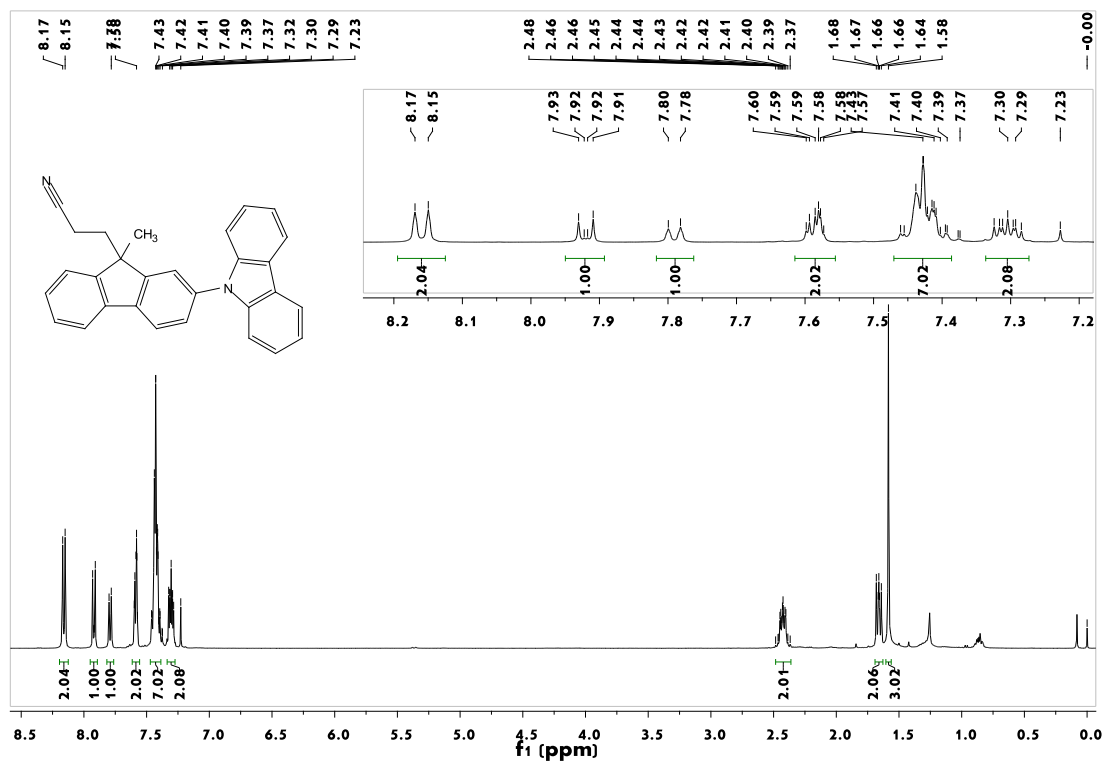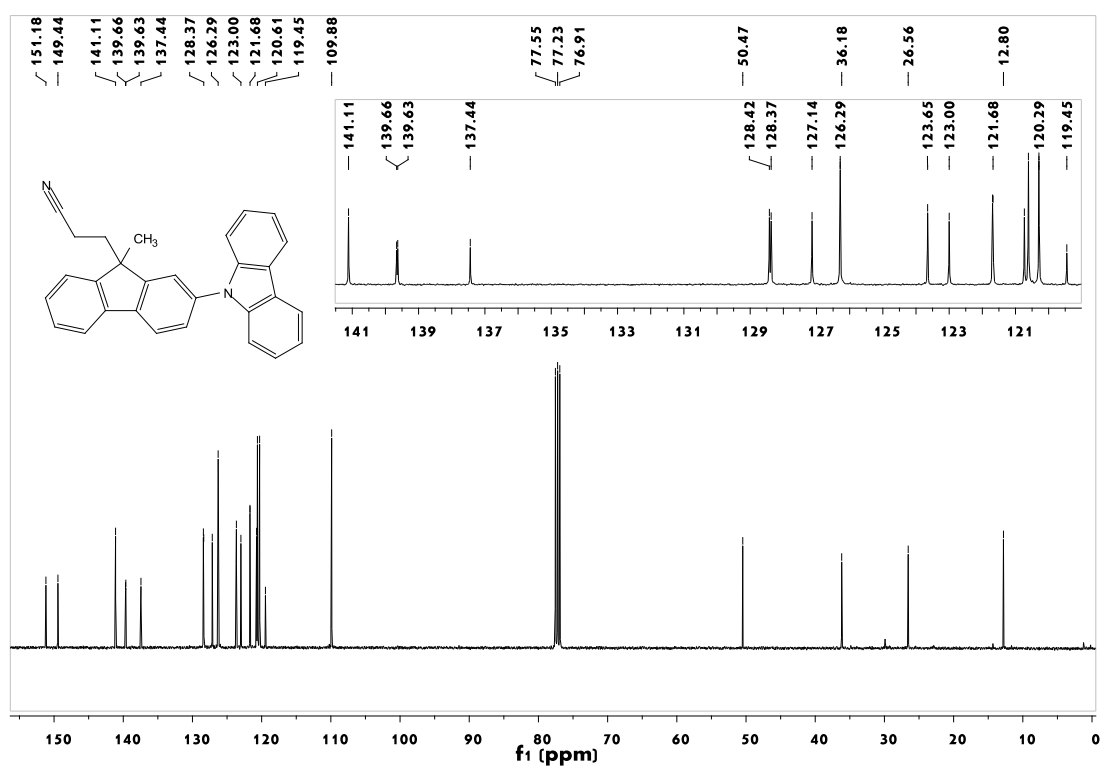

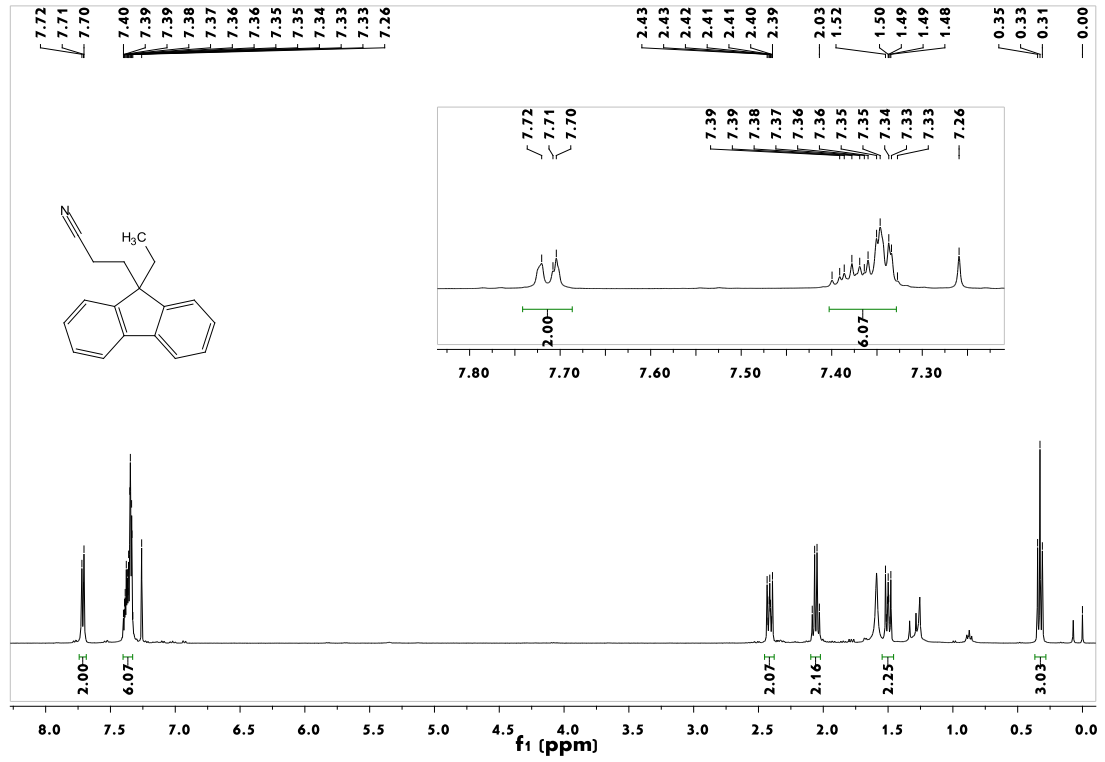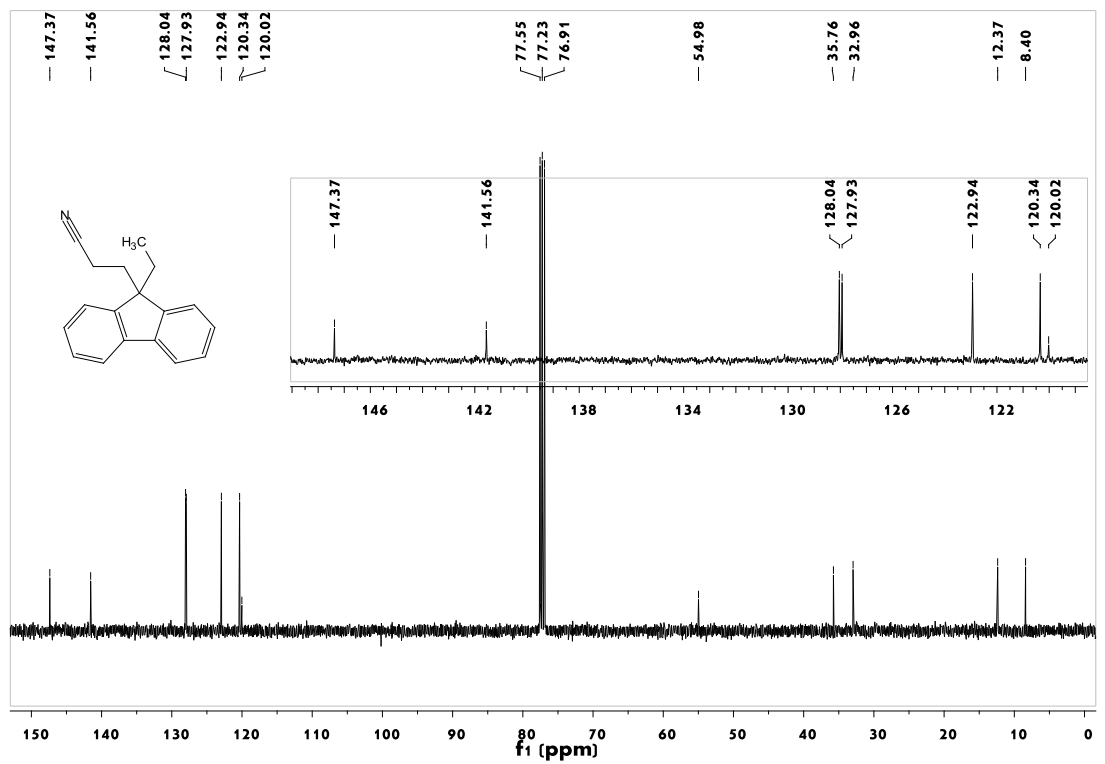

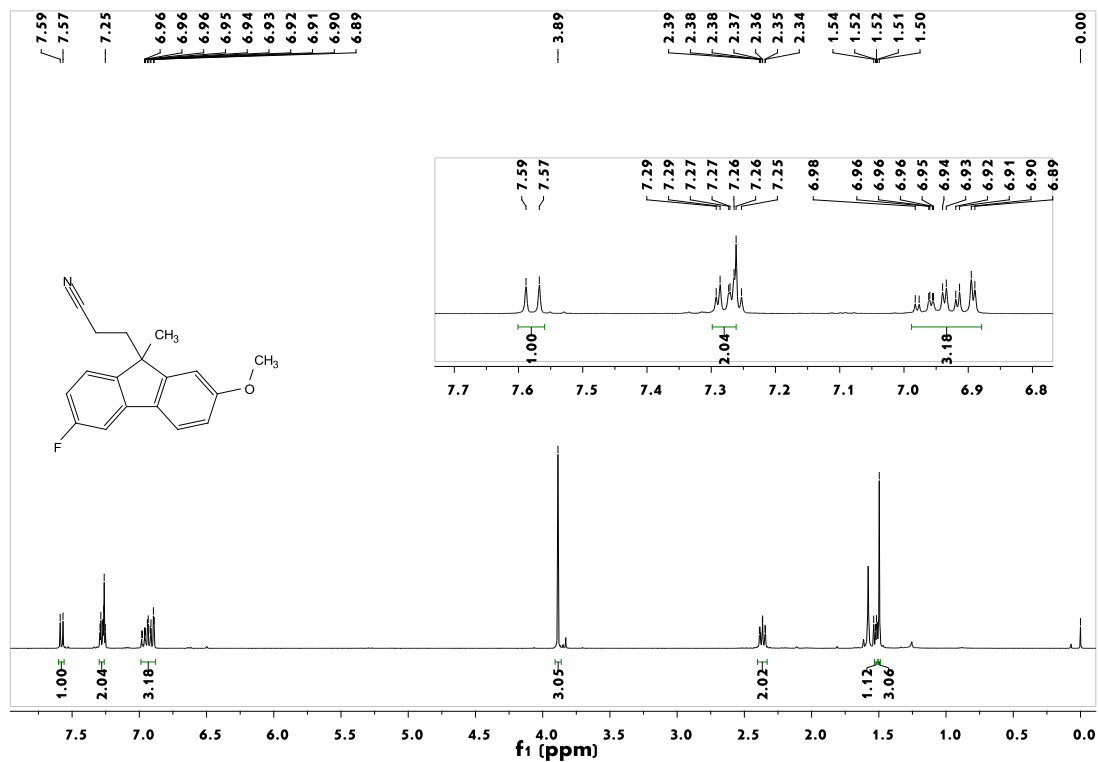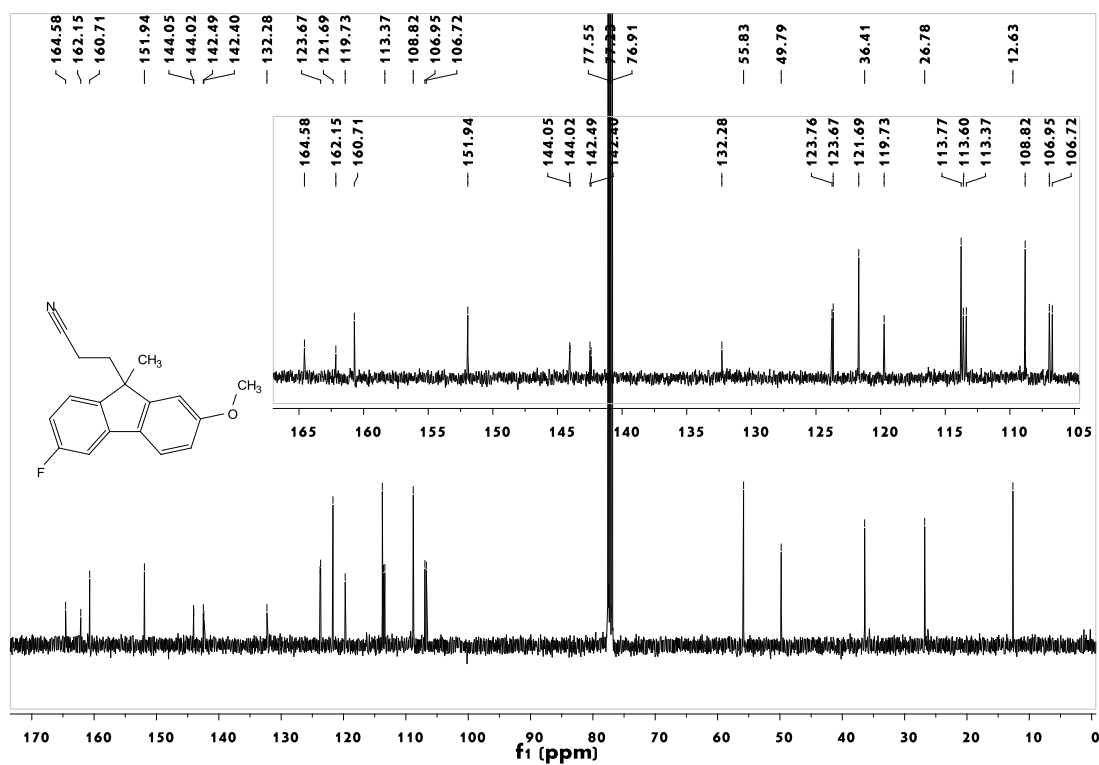



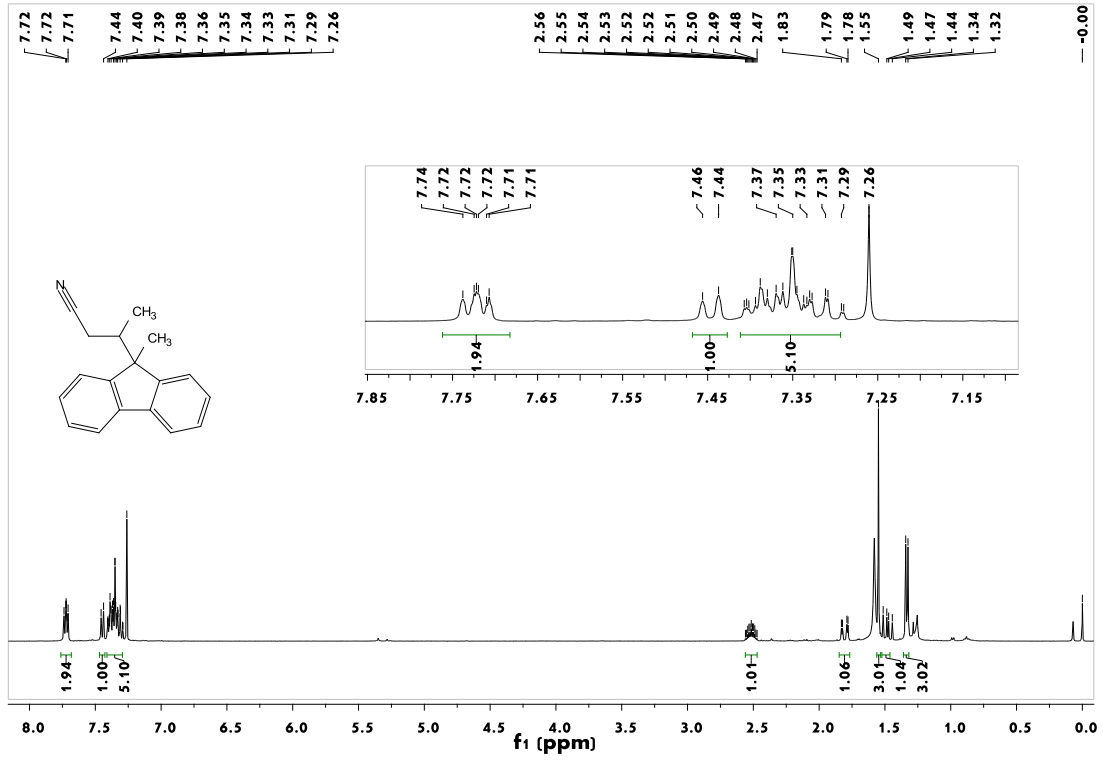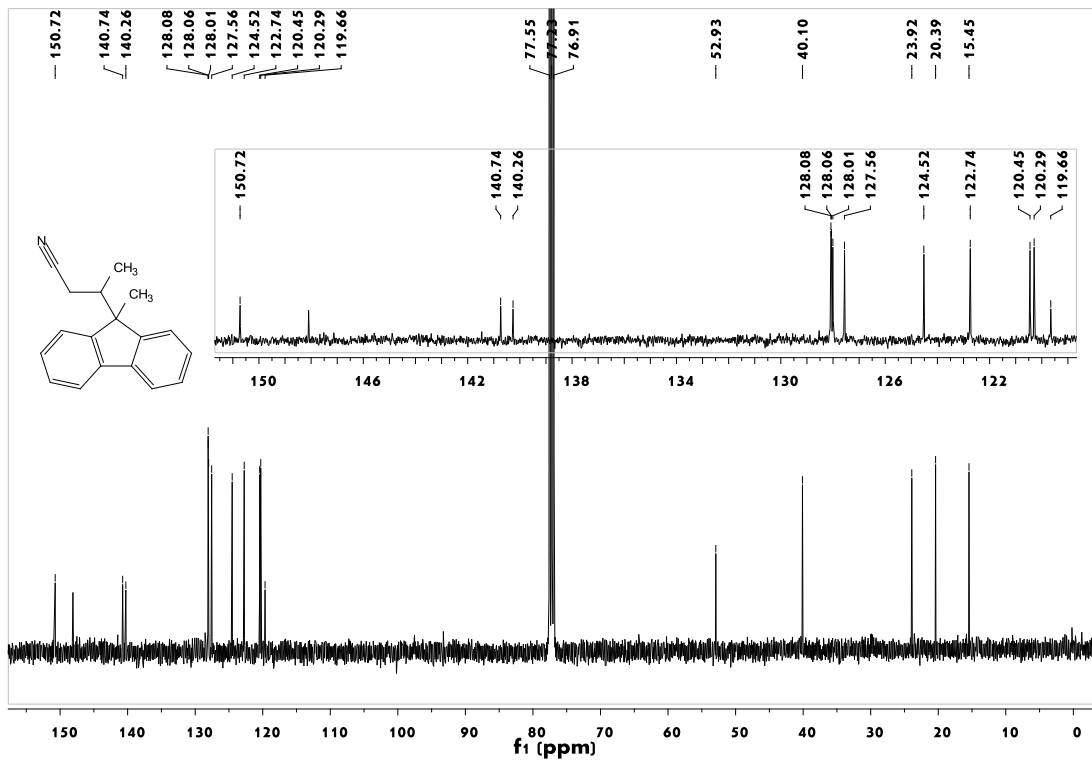

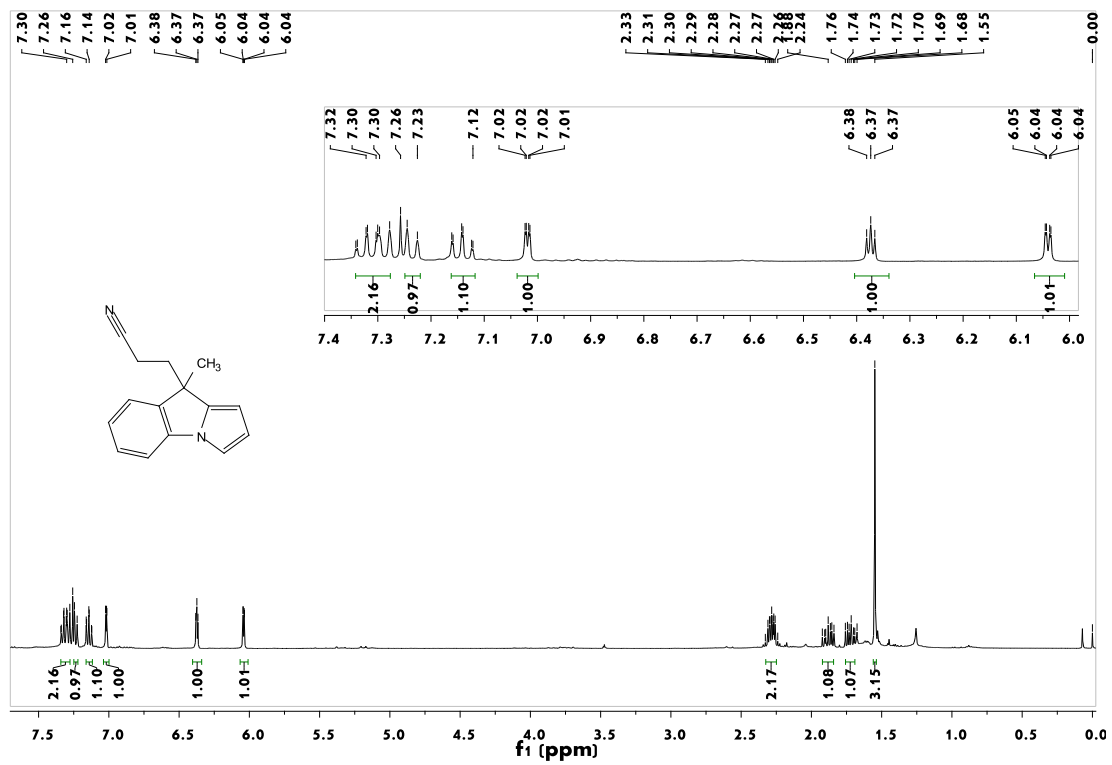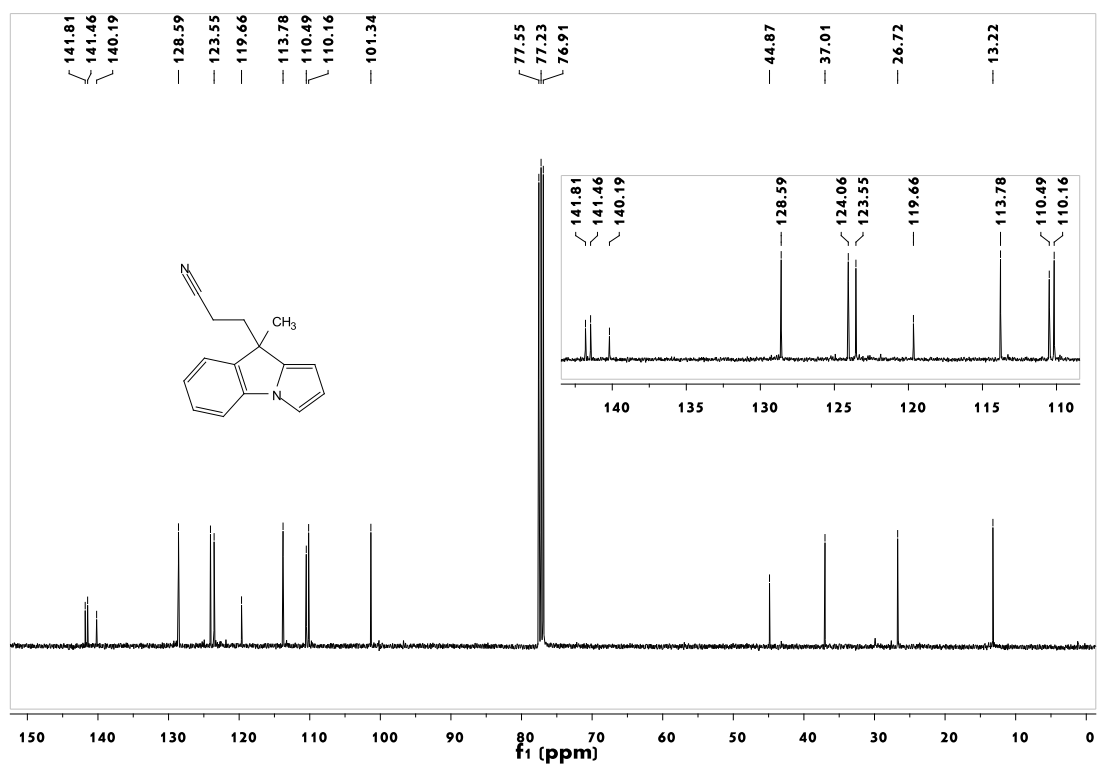



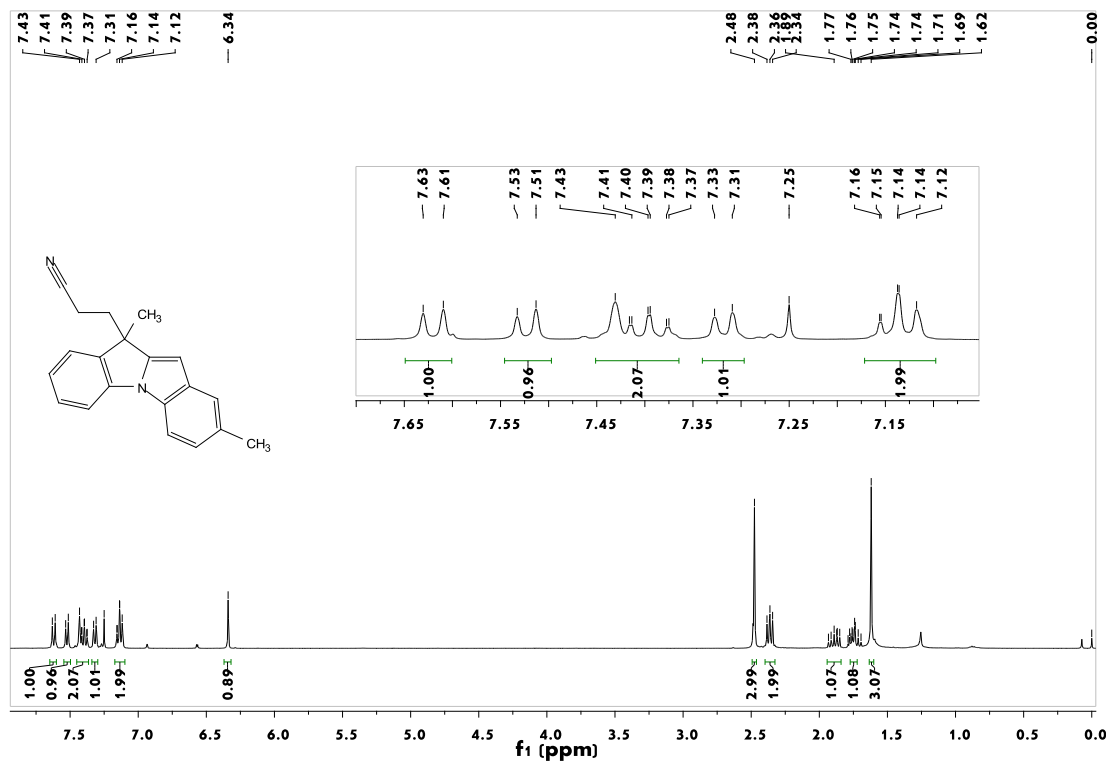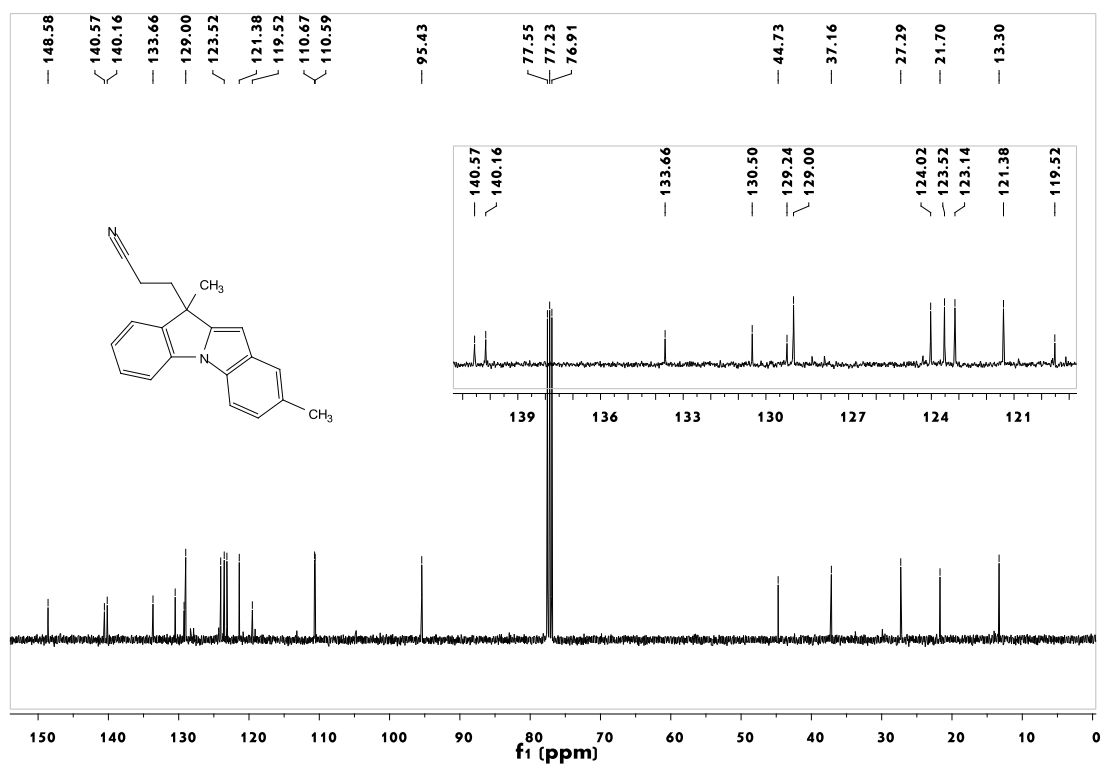

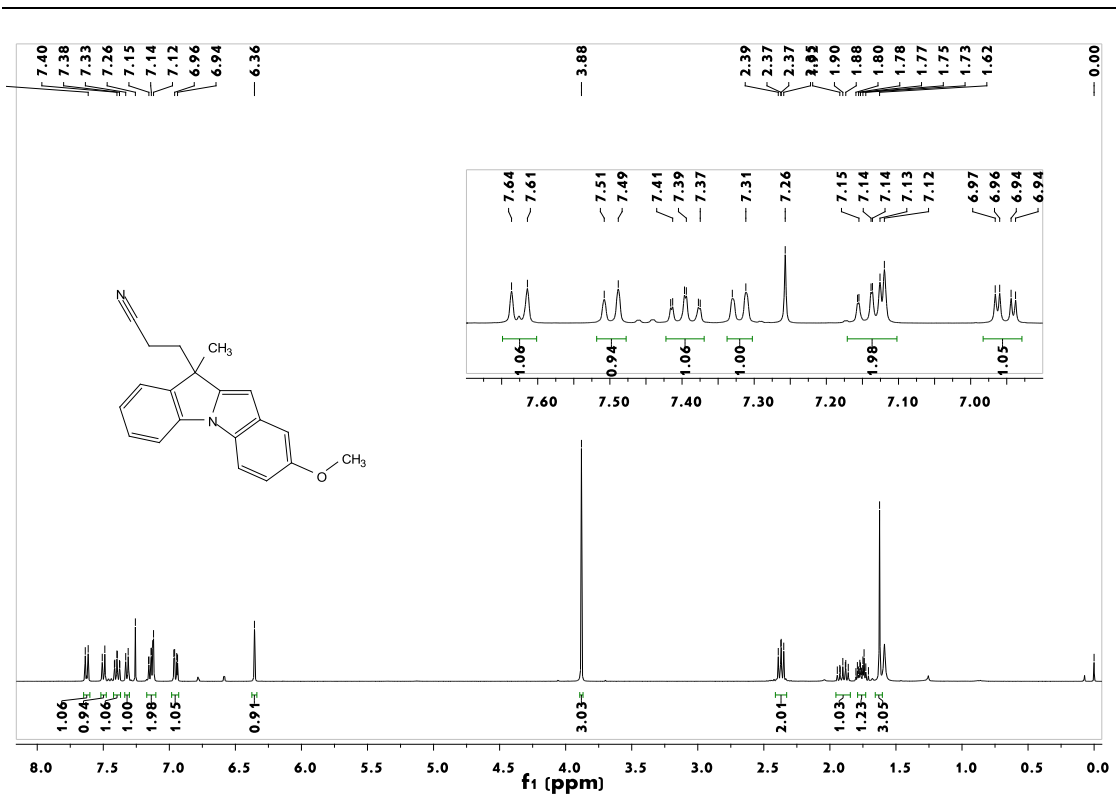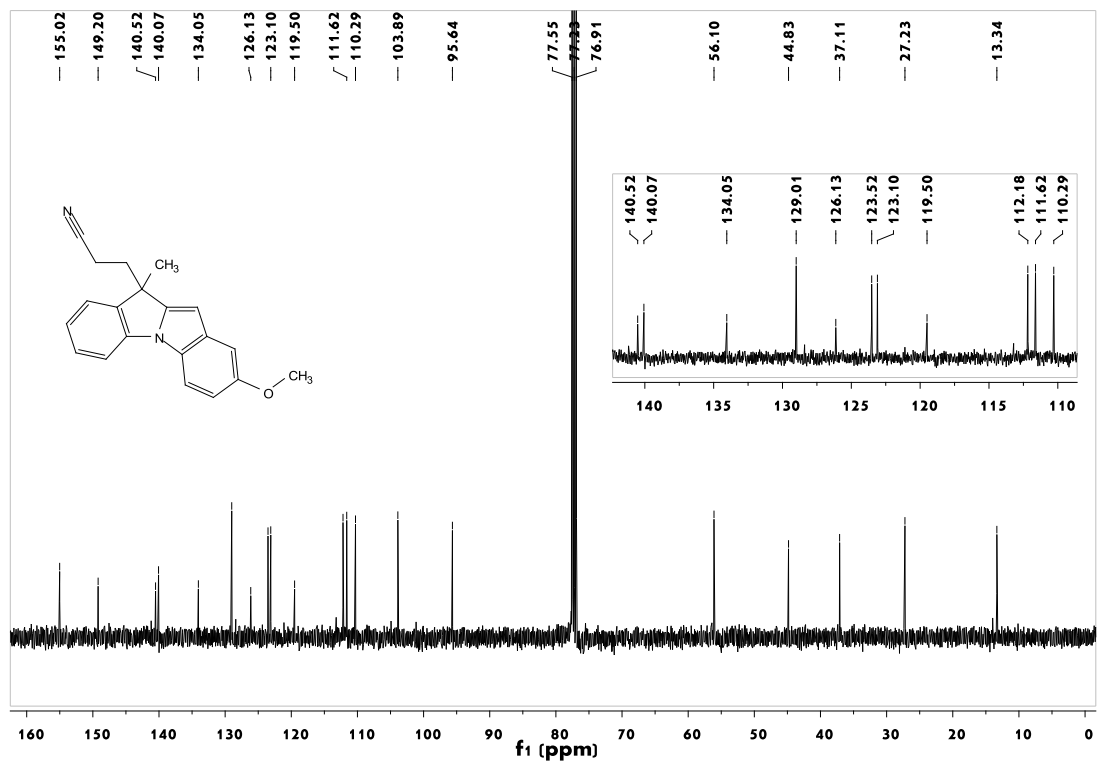

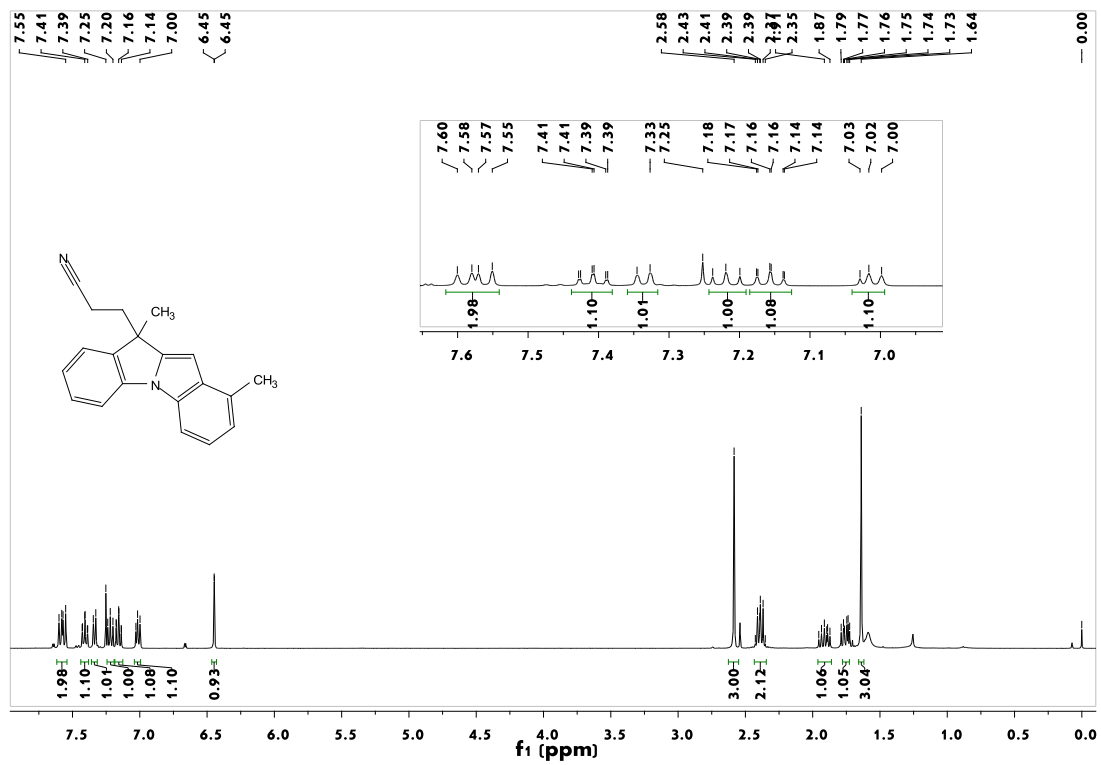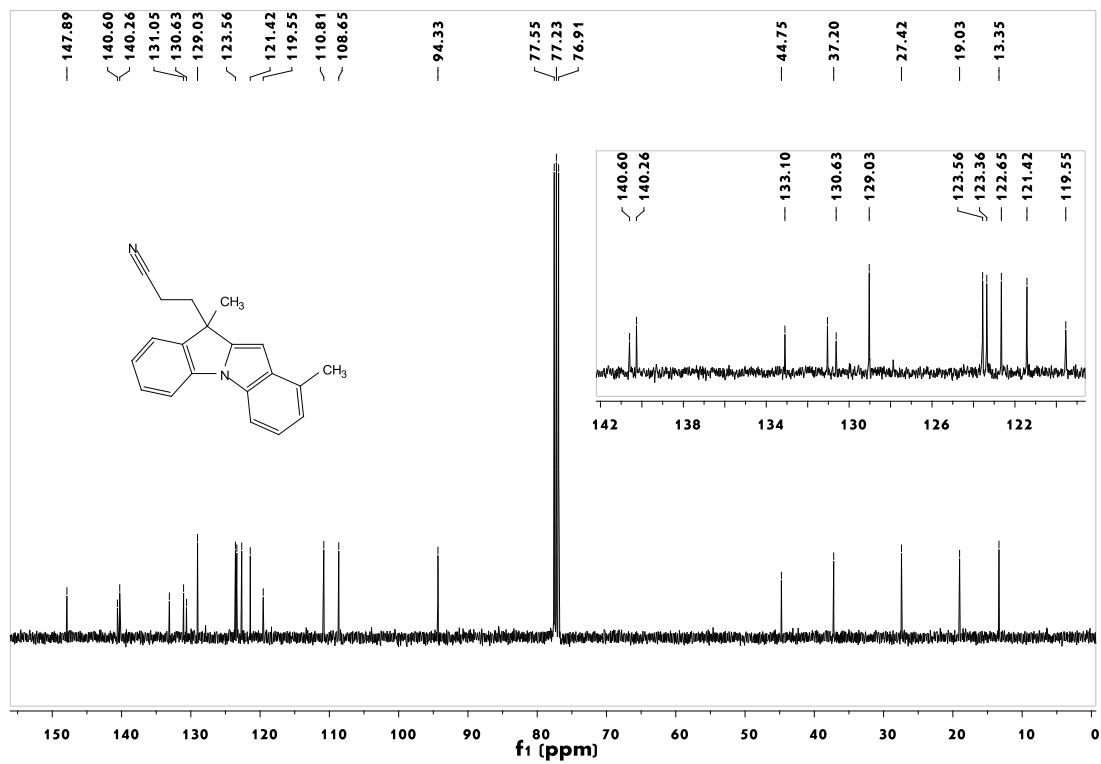

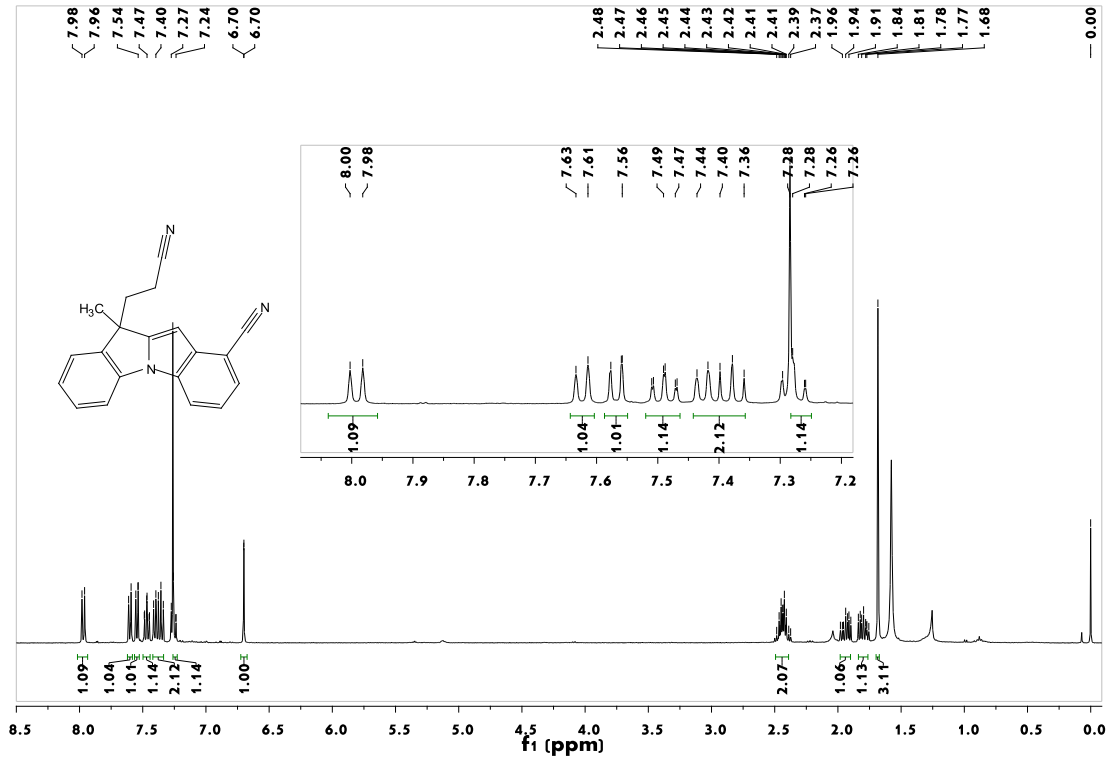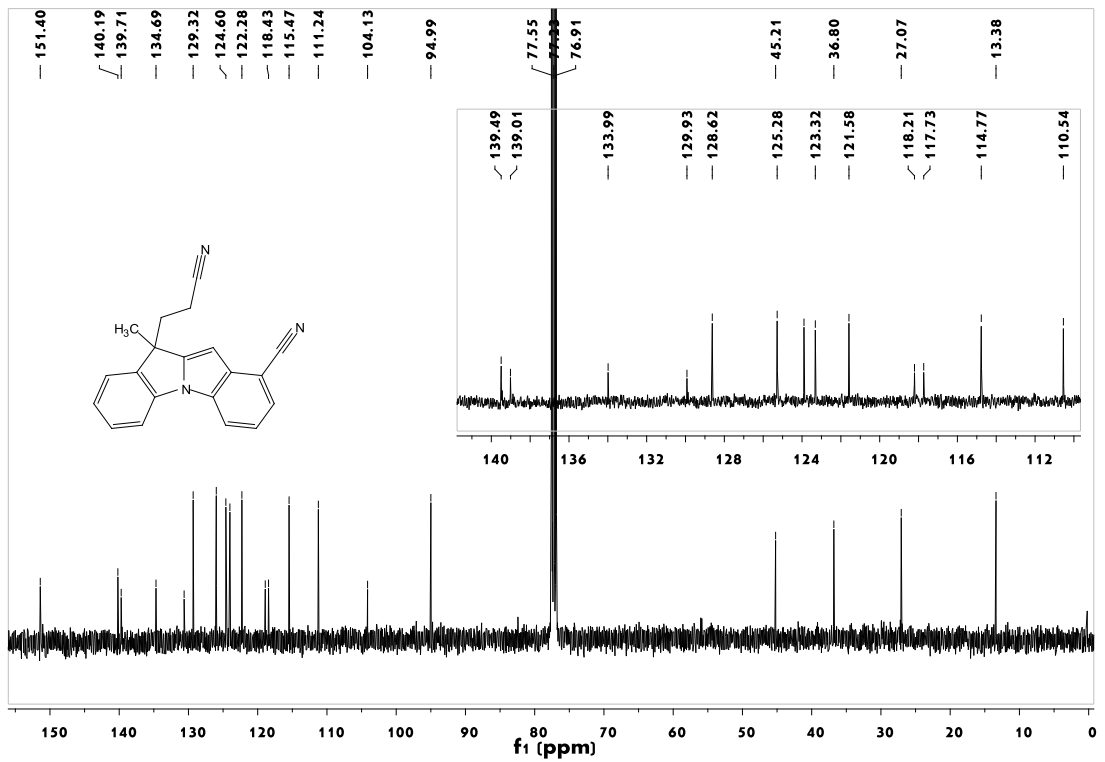

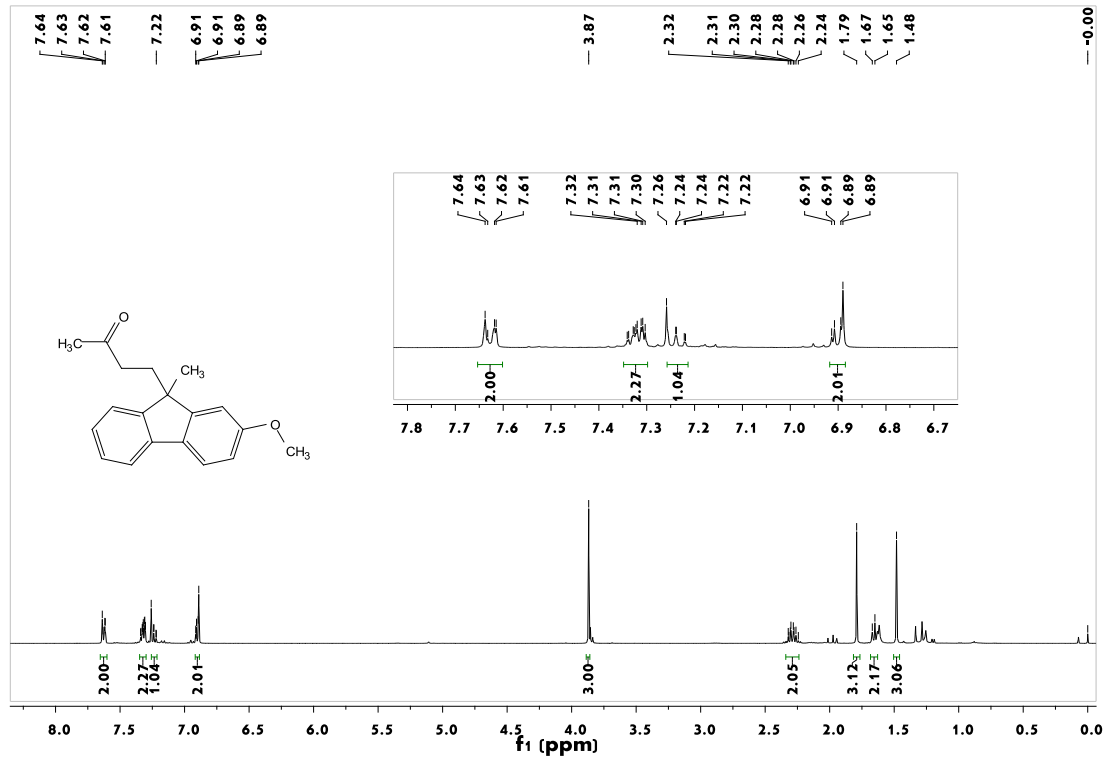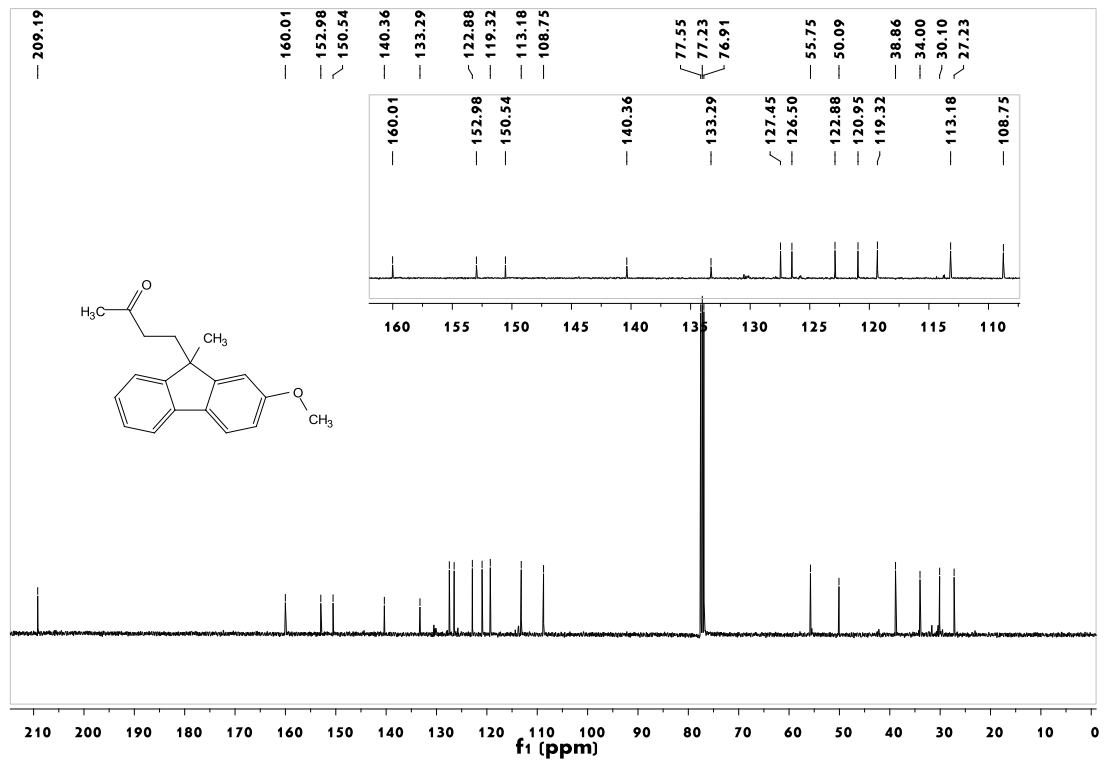



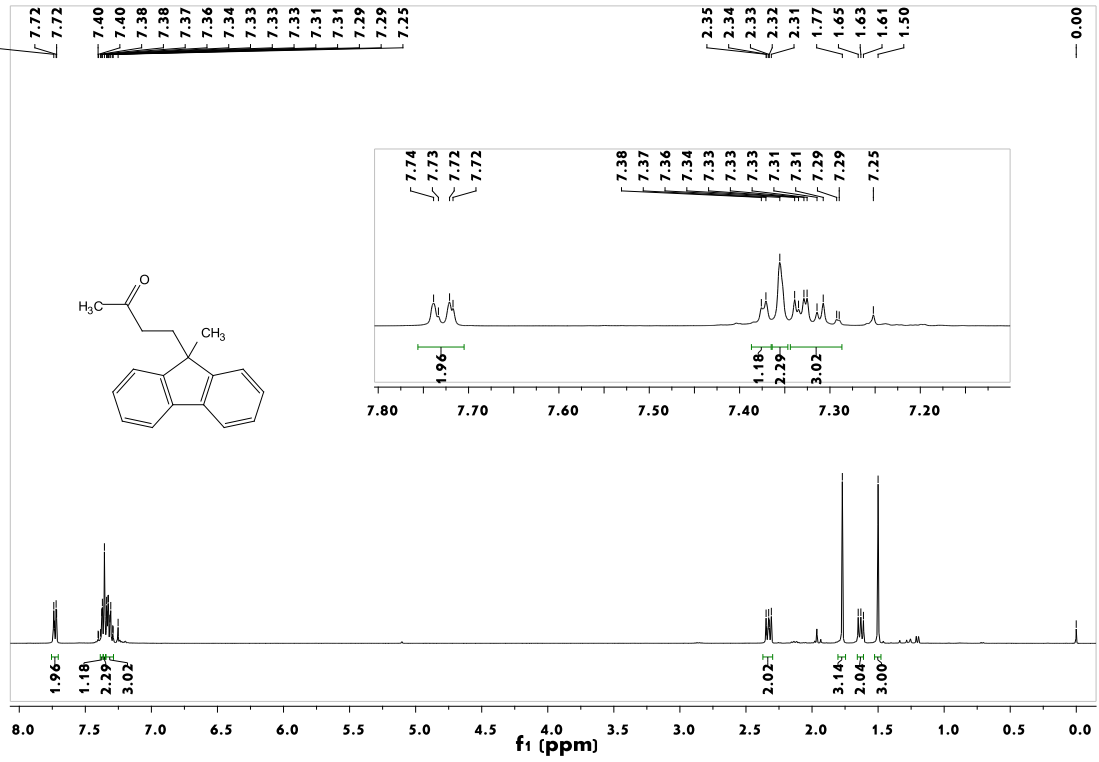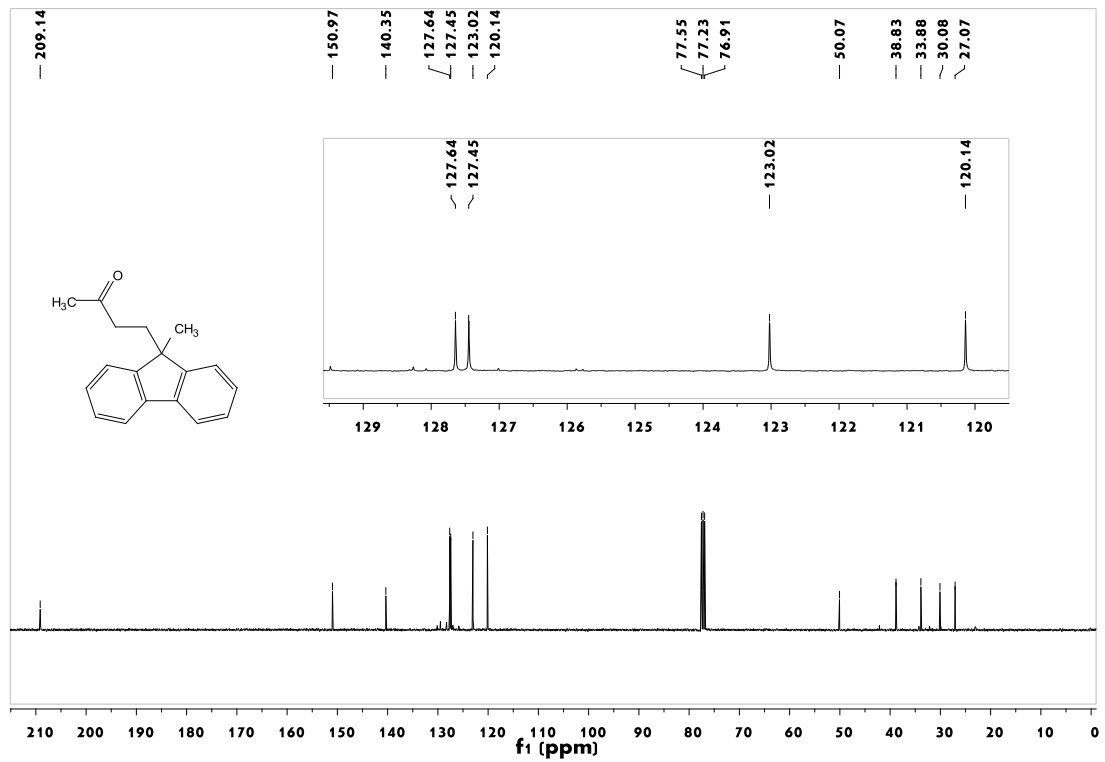

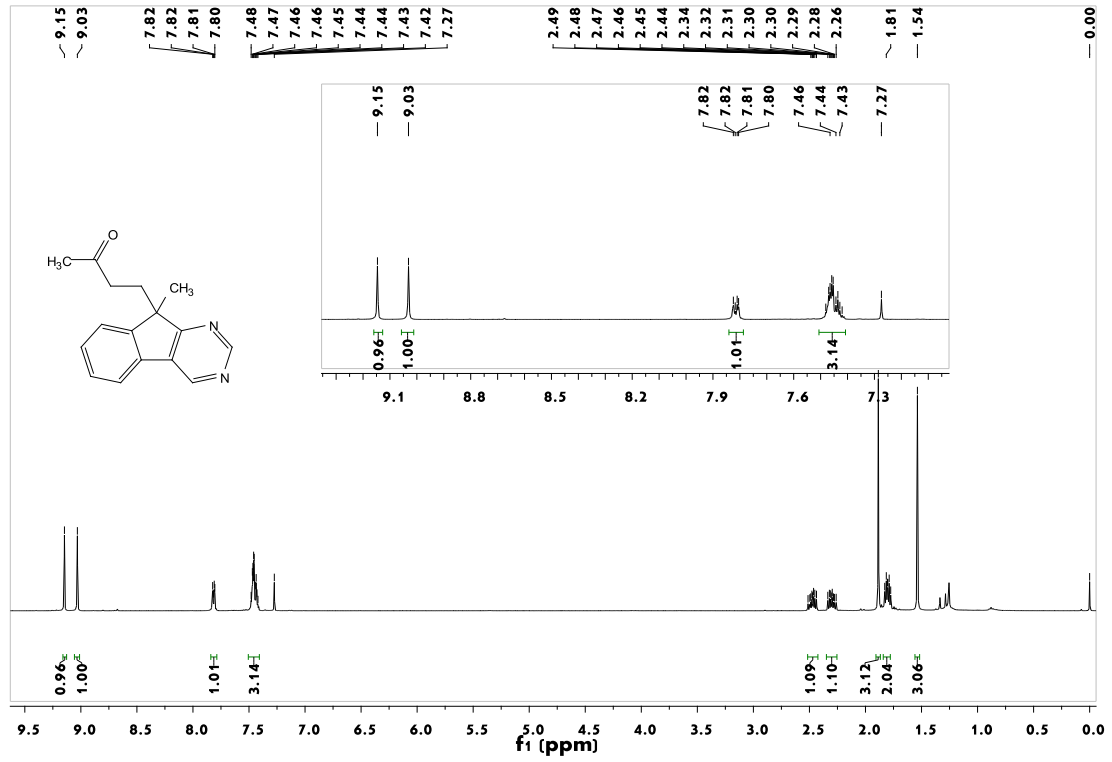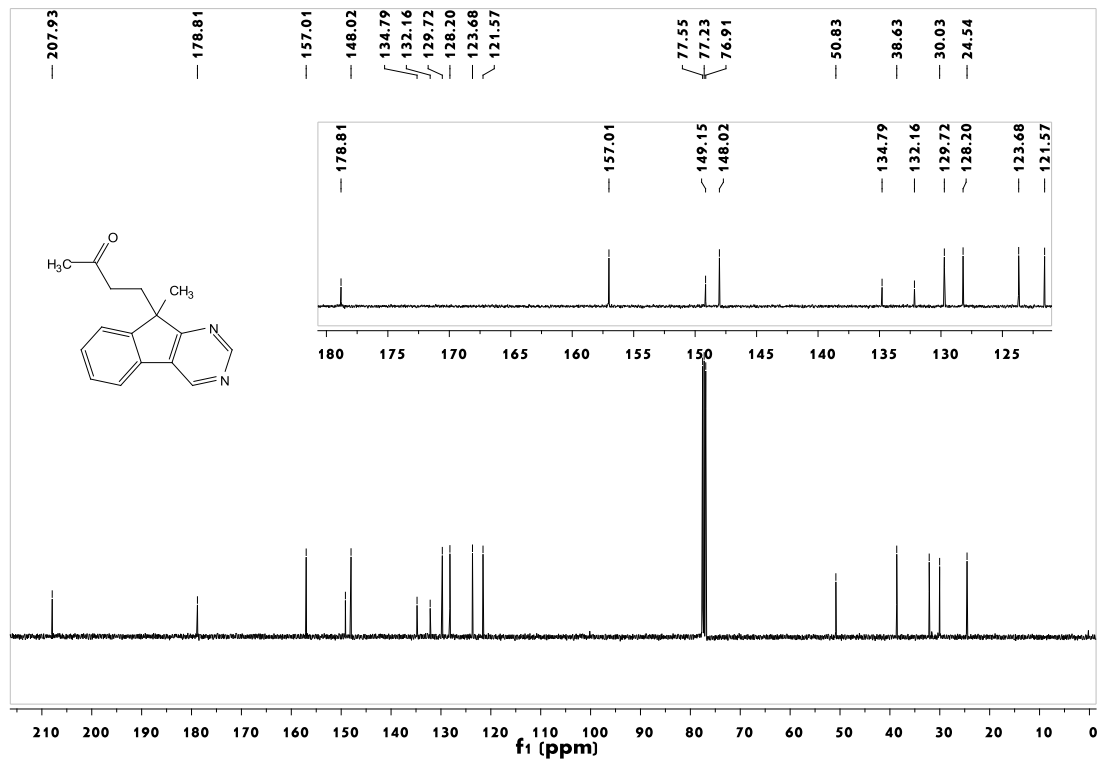

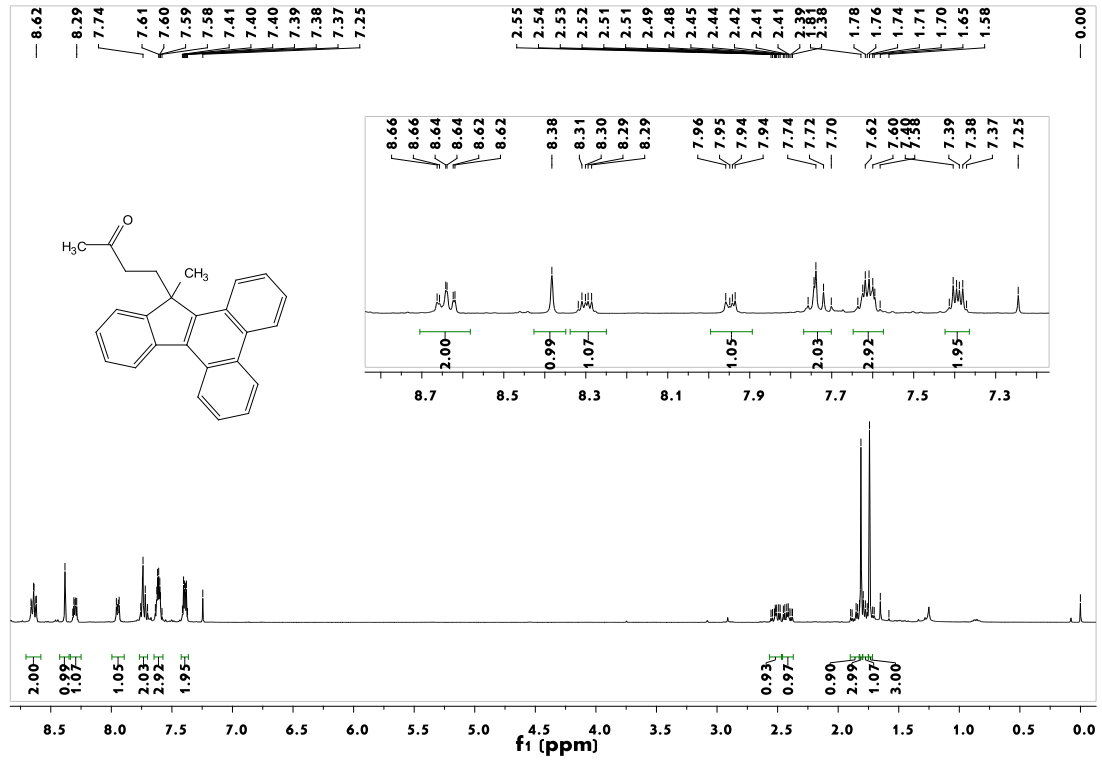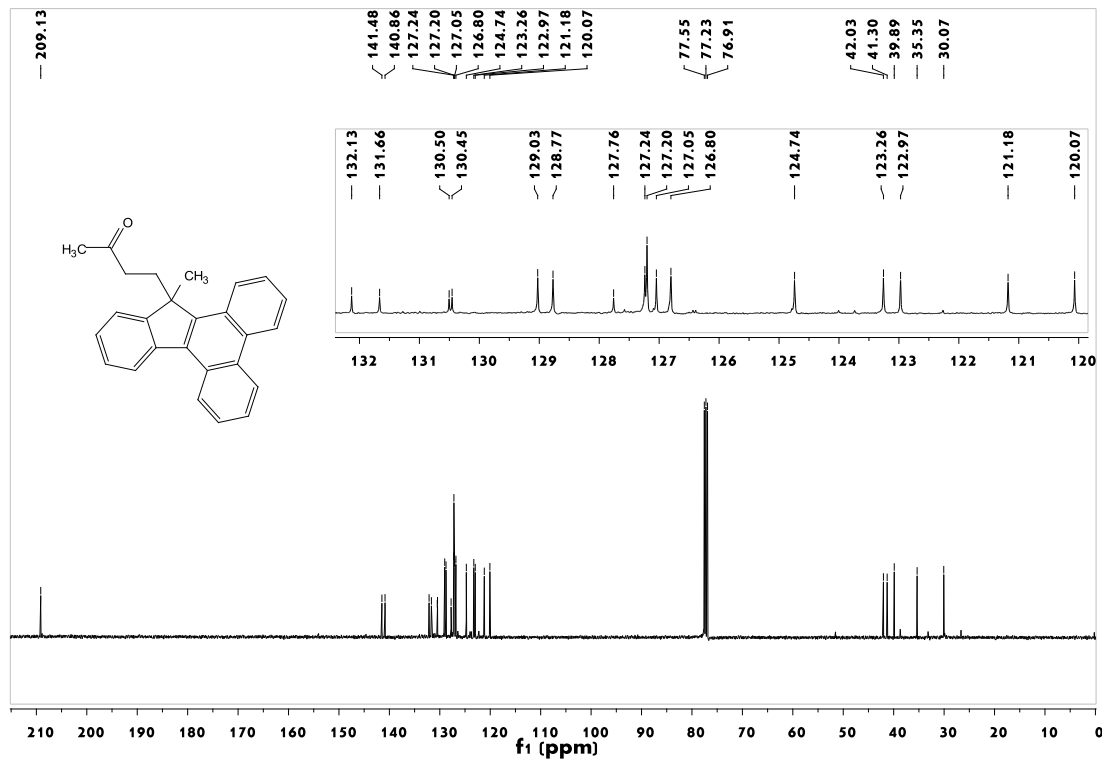

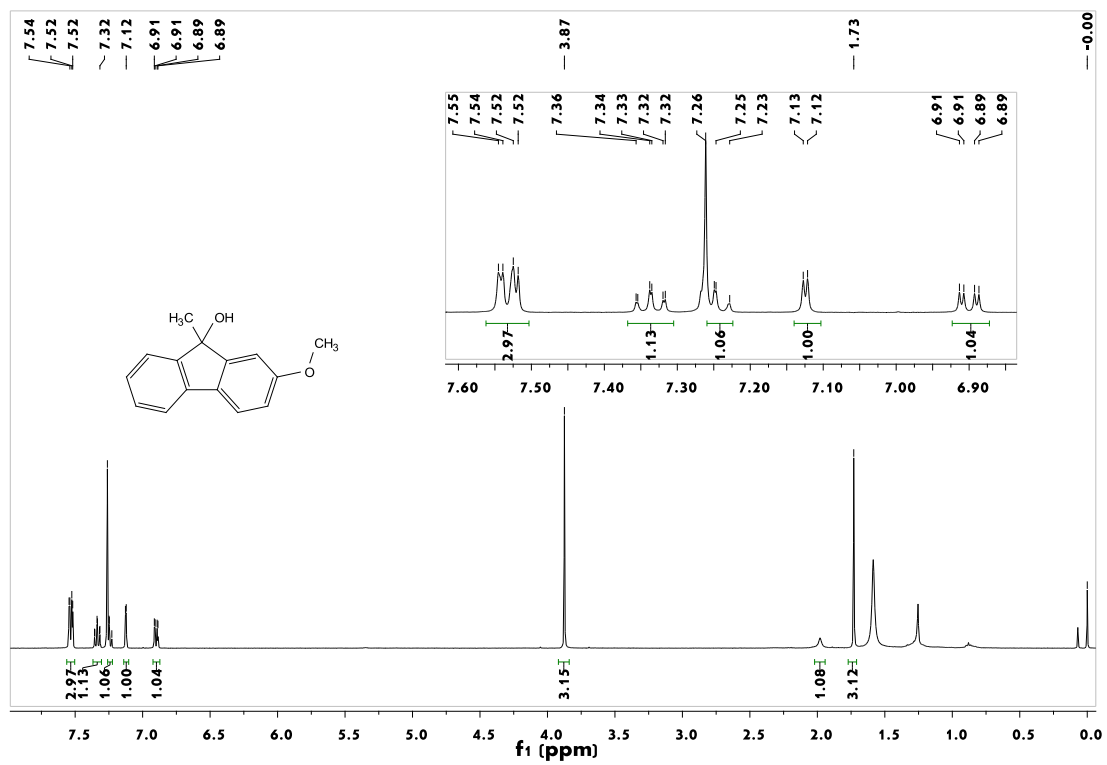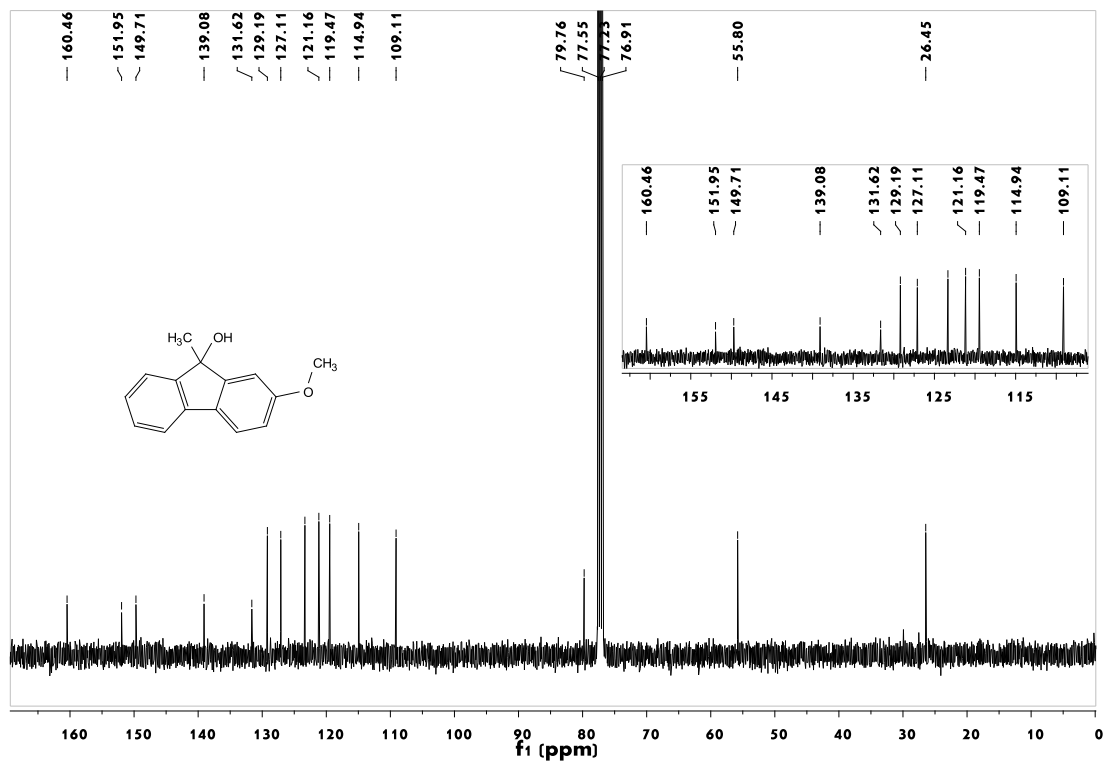

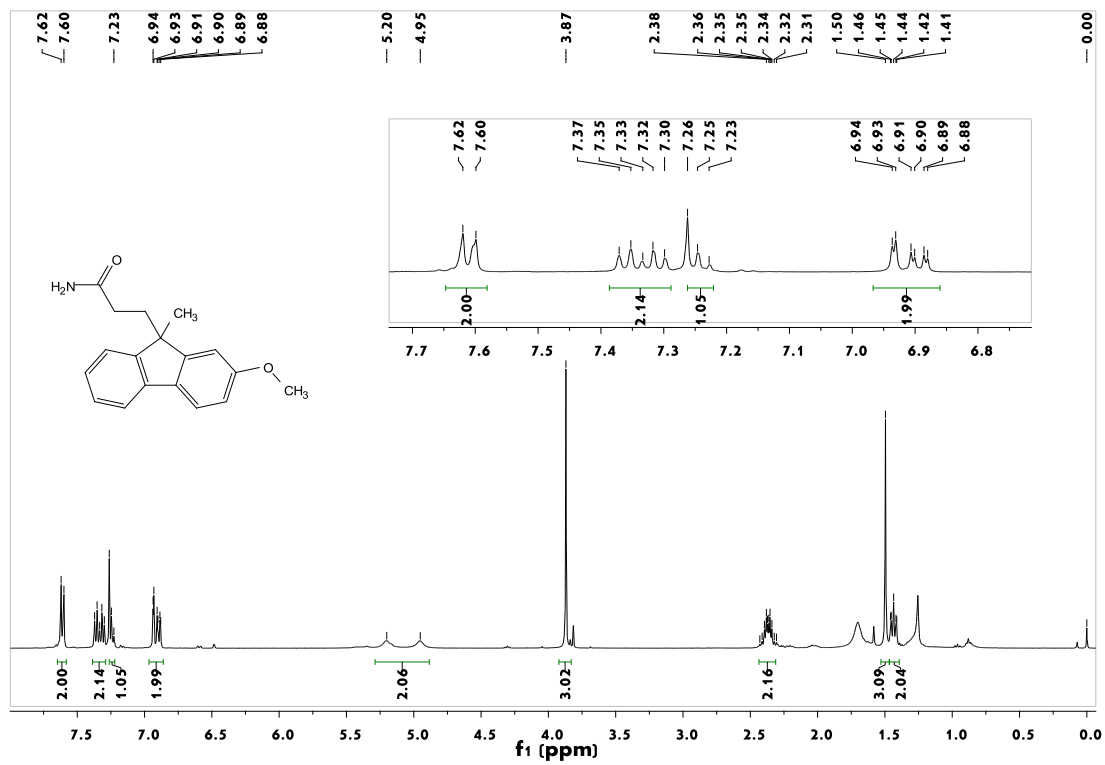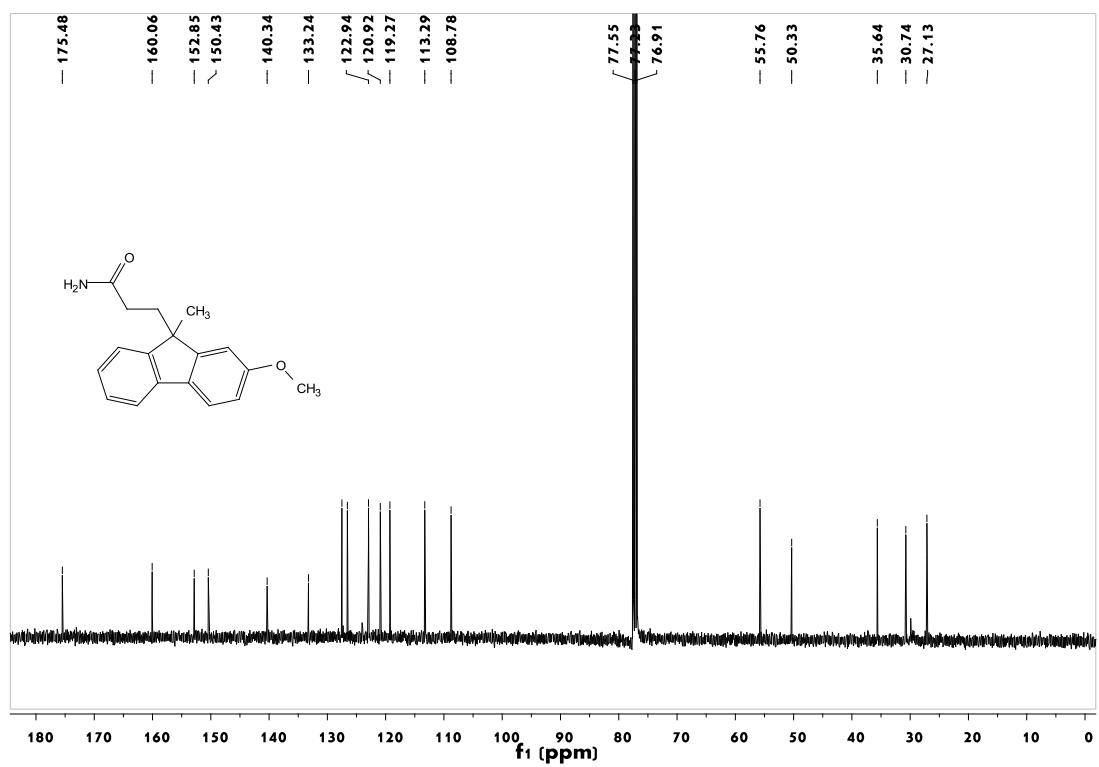

Supplement: c5qo00329f1.pdf [file c5qo00329f1.pdf]
